# Supplementary material for: Tropospheric temperature measurements with the pure rotational Raman lidar technique using nonlinear calibration functions
Source: Copernicus journal article supplement (doi:10.5194/amt-10-315-2017), 2017-01-27
Supplement: Supplementary file 1 [file amt-10-315-2017-supplement.zip]

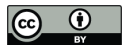

## *Supplement of*

# **Tropospheric temperature measurements with the pure rotational Raman lidar technique using nonlinear calibration functions**

Vladimir V. Zuev et al.

*Correspondence to:* Vladislav V. Gerasimov (gvvsake@mail.ru)

- amt-10-315-2017-supplement-title-page.pdf
- 1 April 2015
  - 01.04.2015. Calculation of calibration coefficients A0 and B0.xlsx
  - 01.04.2015. Calculation of calibration coefficients A1, B1, and C1.xlsx
  - 01.04.2015. Calculation of calibration coefficients A2, B2, and C2.xlsx
  - 01.04.2015. Calculation of calibration coefficients A3, B3, and C3.xlsx
  - 01.04.2015. Calculation of calibration coefficients A4, B4, and C4.xlsx
  - 01.04.2015. Radiosondes data. Novosibirsk and Kolpashevo 00.00 UTC (06.00 LT, Tomsk).xlsx
  - 01.04.2015. Raw lidar and smoothed signals, and their ratios.xlsx
  - 01.04.2015. Temperature profile retrieved using Eq. (11).xlsx
  - 01.04.2015. Temperature profile retrieved using Eq. (13).xlsx
  - 01.04.2015. Temperature profile retrieved using Eq. (15).xlsx
  - 01.04.2015. Temperature profile retrieved using Eq. (18).xlsx
  - 01.04.2015. Temperature profile retrieved using Eq. (20).xlsx
- 2 October 2014
  - 02.10.2014. Calculation of calibration coefficients A0 and B0.xlsx
  - 02.10.2014. Calculation of calibration coefficients A1, B1, and C1.xlsx
  - 02.10.2014. Calculation of calibration coefficients A2, B2, and C2.xlsx
  - 02.10.2014. Calculation of calibration coefficients A3, B3, and C3.xlsx
  - 02.10.2014. Calculation of calibration coefficients A4, B4, and C4.xlsx
  - 02.10.2014. Raw lidar and smoothed signals, and their ratios.xlsx
  - 02.10.2014. Temperature profile retrieved using Eq. (11).xlsx
  - 02.10.2014. Temperature profile retrieved using Eq. (13).xlsx

- 02.10.2014. Temperature profile retrieved using Eq. (15).xlsx
- 02.10.2014. Temperature profile retrieved using Eq. (18).xlsx
- 02.10.2014. Temperature profile retrieved using Eq. (20).xlsx
- 02.10.2014. Temperature profile retrieved using Eqs. (13) and (18).xlsx
- 02.10.2014. Temperature profile retrieved using Eqs. (15) and (20).xlsx
- Constant pressure altitude charts
  - P = 200 hPa.jpg
  - P = 300 hPa.jpg
  - P = 400 hPa.jpg
  - P = 500 hPa.jpg
  - P = 700 hPa.jpg
  - P = 850 hPa.jpg

The copyright of individual parts of the supplement might differ from the CC-BY 3.0 licence.
