# Supplementary material for: Tropospheric temperature measurements with the pure rotational Raman lidar technique using nonlinear calibration functions
Source: Copernicus journal article supplement (doi:10.5194/amt-10-315-2017), 2017-01-27
Supplement: Supplementary file 15 [file 01.04.2015. Temperature profile retrieved using Eq. (11).xlsx]

## Sheet: Лист1
z, km
Altitude	Smoothed signals	Smoothed signals	Smoothed ratio
0.048	1010	96	9.506	240.081	2.76715	0.0115259	A0	0.075	262.05	0.143	264.85	0.82	269.15
0.072	1296.33	125.667	9.29353	242.86	2.02247	0.00832775	0.276342	0.156	264.85	0.196	265.85	1.48	267.15
0.096	1733	179.333	9.14579	244.869	1.72628	0.00704979		0.216	265.85	0.291	267.75	2.99	262.65	3	5.43996
0.12	2039.33	219	9.06602	245.981	1.57915	0.00641979	B0	0.438	269.15	0.493	271.65	5.51	246.65	5.52	3.50723
0.144	2127	244.667	8.98429	247.142	1.51335	0.00612341	474.299	0.551	270.85	0.551	271.35	7.09	235.65	7.08	3.83288
0.168	2101.33	246.333	8.93783	247.812	1.5179	0.00612522		0.826	268.45	0.812	270.25	9.01	219.15	9	0.623706
0.192	1999.33	249.333	8.74533	250.663	1.54882	0.0061789		0.956	267.45	1.212	267.05	11.62	211.65	11.616	1.73601
0.216	1914.33	236	8.57704	253.264	1.62415	0.00641287		1.351	268.25	1.257	266.65
0.24	1882.8	223.4	8.43575	255.53	1.31358	0.00514061		1.463	268.65	1.474	266.45
0.264	1818	220.4	8.34125	257.091	1.34024	0.00521308		1.5	268.45	1.847	265.35
0.288	1776	209.6	8.30479	257.703	1.3789	0.00535074		1.676	267.15	2.977	261.85
0.312	1721	204.8	8.28875	257.974	1.39852	0.00542115		1.895	265.45	3.369	261.05
0.336	1665.8	196.8	8.29572	257.856	1.42481	0.00552559		2.049	265.65	3.553	260.05
0.36	1600.8	197.4	8.30562	257.689	1.42408	0.00552635		2.542	263.25	4.248	256.35
0.384	1578.4	190.8	8.30969	257.62	1.44616	0.00561354		2.945	263.85	4.299	256.05
0.408	1554	187.4	8.32954	257.287	1.45526	0.00565617		3	263.65	5.49	246.85
0.432	1538.8	184.2	8.32789	257.314	1.46758	0.00570344		3.201	263.05	6.549	239.55
0.456	1526.8	188.6	8.32695	257.33	1.45301	0.00564648		3.523	261.45	6.649	238.85
0.48	1502	182.714	8.31697	257.498	1.24822	0.00484749		3.798	260.05	7.07	234.85
0.504	1503.29	177.429	8.33372	257.217	1.26187	0.00490587		4.361	256.05	7.881	228.25
0.528	1486.57	175.571	8.3297	257.284	1.26924	0.00493321		5.252	249.65	8.98	219.25
0.552	1494.14	176.714	8.32041	257.44	1.26675	0.00492057		5.53	247.65	9.088	217.65
0.576	1507.14	179.571	8.30914	257.629	1.25898	0.00488678		5.72	246.45	10.031	211.75
0.6	1531.29	183.286	8.33444	257.205	1.24235	0.00483021		5.991	244.65	10.081	211.45
0.624	1590	191.714	8.35155	256.919	1.21252	0.00471945		6.192	243.05	10.13	211.65
0.648	1672.71	203.286	8.35273	256.899	1.17782	0.00458477		6.903	237.45	10.435	211.95
0.672	1765.57	215.571	8.37047	256.604	1.14143	0.00444822		7.11	235.85	10.54	212.05
0.696	1907	231.714	8.38917	256.295	1.09801	0.00428417		7.771	230.05	11.52	214.65
0.72	2145.56	256.222	8.42053	255.779	0.916323	0.00358248		8.035	228.45	11.713	215.45
0.744	2359.11	280.556	8.45796	255.169	0.871318	0.00341467		9.03	221.65	12.151	215.35
0.768	2637.11	310.778	8.49936	254.5	0.823139	0.00323433		10.19	213.05	12.585	215.25
0.792	2957.67	341.444	8.5524	253.654	0.779249	0.0030721		10.315	212.25	13.051	215.15
0.816	3330.56	384.556	8.59878	252.922	0.730049	0.00288646		10.896	208.45	13.34	215.05
0.84	3758.33	430.111	8.63133	252.414	0.687217	0.00272258		11.175	207.85	15.89	213.45
0.864	4239	483.556	8.64326	252.228	0.647069	0.00256541		11.56	209.25	16.757	212.35
0.888	4755.56	543.556	8.64366	252.222	0.610344	0.00241987		12.042	210.25
0.912	5328.22	604.667	8.62918	252.447	0.579501	0.00229554		12.457	211.05
0.936	5939.44	682.667	8.59296	253.014	0.548199	0.00216668		13.34	212.85
0.96	6680.73	777.909	8.5523	253.655	0.467192	0.00184184		13.551	213.45
0.984	7377.73	867.455	8.49807	254.521	0.445675	0.00175103		14.042	212.95
1.008	8097.18	962.455	8.4361	255.525	0.426697	0.00166988		15.86	211.25
1.032	8841	1061.82	8.36759	256.652	0.410061	0.00159773		15.985	211.05
1.056	9623.55	1164.55	8.28726	257.999	0.395837	0.00153426		15.998	211.05
1.08	10427.5	1269.55	8.20841	259.348	0.383216	0.00147761
1.104	11233.7	1379.82	8.1329	260.665	0.371506	0.00142522
1.128	12053.5	1490.91	8.06077	261.947	0.361061	0.00137837
1.152	12867.5	1609.36	7.99296	263.175	0.351001	0.00133371
1.176	13689.3	1726.64	7.92992	264.337	0.342029	0.00129392
1.2	14465.6	1846.77	7.86698	265.516	0.307145	0.00115679
1.224	15246.9	1965.46	7.80453	266.706	0.300567	0.00112696
1.248	16037.3	2079.62	7.74445	267.87	0.294857	0.00110075
1.272	16832.2	2195.38	7.68471	269.047	0.289601	0.0010764
1.296	17590.2	2304.54	7.62962	270.149	0.285054	0.00105517
1.32	18338.1	2422	7.57982	271.16	0.280274	0.00103361
1.344	19050.5	2531.08	7.53469	272.089	0.276146	0.00101491
1.368	19726.9	2637.08	7.49271	272.964	0.272379	0.000997858
1.392	20398	2746.31	7.45424	273.775	0.26861	0.000981132
1.416	21053.6	2849.15	7.4168	274.573	0.265338	0.000966363
1.44	21620.8	2929.47	7.37997	275.367	0.245034	0.000889846
1.464	22202.9	3026.33	7.34672	276.091	0.242436	0.000878104
1.488	22756.1	3119.13	7.31426	276.804	0.240119	0.00086747
1.512	23293.5	3195.93	7.28341	277.489	0.238405	0.000859154
1.536	23764.9	3275.53	7.25543	278.115	0.23662	0.0008508
1.56	24232.3	3352.67	7.23034	278.681	0.23489	0.000842862
1.584	24647.6	3420.6	7.20422	279.275	0.233581	0.000836385
1.608	25016.9	3489.33	7.18051	279.818	0.232241	0.000829971
1.632	25354.8	3550.47	7.1593	280.307	0.231095	0.000824433
1.656	25660.9	3604.2	7.13749	280.814	0.230238	0.000819895
1.68	25838.9	3632.41	7.11654	281.303	0.216193	0.00076854
1.704	26068.8	3675.24	7.09663	281.771	0.215684	0.000765456
1.728	26294.9	3716.18	7.07915	282.185	0.215155	0.00076246
1.752	26471.7	3748.29	7.06625	282.491	0.214722	0.000760101
1.776	26617.1	3776.24	7.05482	282.764	0.214365	0.000758106
1.8	26724.6	3804.29	7.04647	282.964	0.21392	0.000755998
1.824	26805.8	3824.65	7.03909	283.141	0.213647	0.000754563
1.848	26869.4	3831.18	7.03329	283.28	0.213667	0.00075426
1.872	26895.4	3827.06	7.02832	283.4	0.213935	0.000754888
1.896	26901.9	3834.65	7.02508	283.478	0.213864	0.00075443
1.92	26818.3	3816	7.02426	283.498	0.202795	0.000715333
1.944	26804.1	3811.58	7.02685	283.435	0.202815	0.000715562
1.968	26735.4	3803.42	7.03261	283.296	0.202839	0.000715997
1.992	26657.9	3796.84	7.03825	283.161	0.202835	0.000716326
2.016	26554.3	3779.05	7.04389	283.025	0.203108	0.000717631
2.04	26436.4	3755.42	7.05225	282.825	0.203435	0.000719295
2.064	26298.6	3728.53	7.05967	282.648	0.203886	0.000721344
2.088	26153.1	3698.05	7.0685	282.438	0.204386	0.000723652
2.112	25984.6	3672.53	7.07884	282.192	0.204733	0.00072551
2.136	25817.3	3641.53	7.09194	281.882	0.205126	0.0007277
2.16	25586.9	3600	7.10637	281.542	0.195732	0.000695214
2.184	25375	3569.19	7.12062	281.207	0.196105	0.000697367
2.208	25175.7	3531.24	7.13416	280.891	0.196678	0.000700194
2.232	24946.2	3492.38	7.14789	280.572	0.197297	0.000703196
2.256	24710.8	3448.76	7.16269	280.229	0.198018	0.00070663
2.28	24460.6	3404.19	7.17753	279.887	0.198789	0.00071025
2.304	24214	3364.76	7.19171	279.561	0.199467	0.000713501
2.328	23963.4	3327.19	7.20656	279.221	0.200093	0.000716611
2.352	23698.5	3280.9	7.22237	278.862	0.200945	0.000720592
2.376	23449.8	3239.71	7.2385	278.496	0.201664	0.000724116
2.4	23172.8	3195	7.25509	278.122	0.193496	0.000695722
2.424	22902.5	3153.09	7.27128	277.76	0.194252	0.000699354
2.448	22622.4	3110.57	7.28892	277.366	0.195007	0.000703066
2.472	22342.3	3059.17	7.30714	276.962	0.196015	0.000707734
2.496	22065.8	3014.26	7.32446	276.579	0.196897	0.000711903
2.52	21794	2966.13	7.3425	276.183	0.197876	0.000716468
2.544	21520.8	2922.65	7.36093	275.78	0.198737	0.000720633
2.568	21250.2	2875.39	7.37994	275.367	0.19972	0.000725285
2.592	20973.5	2833.22	7.39916	274.952	0.200575	0.000729489
2.616	20702.4	2792.43	7.41828	274.541	0.201413	0.000733634
2.64	20430.3	2747.24	7.43695	274.143	0.19417	0.000708281
2.664	20155.3	2703.4	7.45443	273.771	0.195179	0.000712927
2.688	19882.9	2660.76	7.47212	273.397	0.196173	0.000717537
2.712	19602.6	2619.2	7.48865	273.049	0.197202	0.000722222
2.736	19332.8	2573	7.5055	272.697	0.198405	0.000727567
2.76	19054.4	2531.88	7.52424	272.306	0.199418	0.000732332
2.784	18794.8	2492.72	7.54272	271.923	0.200392	0.000736944
2.808	18534.3	2452.24	7.56212	271.523	0.201417	0.000741804
2.832	18281.3	2414.28	7.5812	271.132	0.202388	0.000746455
2.856	18021.7	2375	7.60157	270.717	0.203405	0.000751358
2.88	17775.6	2332.78	7.62226	270.298	0.196831	0.000728201
2.904	17522.4	2293.56	7.64279	269.884	0.19787	0.000733166
2.928	17269.5	2251.89	7.66414	269.456	0.199016	0.000738583
2.952	17003.3	2213.22	7.68512	269.038	0.200104	0.000743775
2.976	16747	2172.59	7.70948	268.556	0.201205	0.000749209
3	16503.2	2131.85	7.73319	268.09	0.202364	0.000754836
3.024	16261.4	2097.81	7.75641	267.637	0.203294	0.00075959
3.048	16022.9	2060.89	7.7787	267.204	0.20441	0.000764996
3.072	15791.1	2027.37	7.79948	266.803	0.205453	0.000770055
3.096	15559.3	1984.59	7.81958	266.417	0.206979	0.000776897
3.12	15337.4	1954.07	7.83754	266.074	0.200737	0.000754441
3.144	15103.7	1917.86	7.85449	265.752	0.202095	0.000760464
3.168	14878.4	1886.9	7.87205	265.42	0.203223	0.000765666
3.192	14654.2	1855.55	7.88904	265.1	0.204421	0.000771107
3.216	14426.7	1825.31	7.90715	264.761	0.205571	0.00077644
3.24	14205.7	1796.86	7.92218	264.481	0.20675	0.000781721
3.264	13987.2	1764.34	7.938	264.187	0.208151	0.000787893
3.288	13778.2	1734.24	7.95325	263.904	0.209476	0.000793758
3.312	13564	1703.69	7.96856	263.622	0.21087	0.000799893
3.336	13354.7	1671.79	7.98465	263.327	0.212356	0.000806433
3.36	13161.7	1644.13	8.00124	263.024	0.206611	0.000785522
3.384	12964.4	1615.9	8.01912	262.699	0.207867	0.000791276
3.408	12768.2	1587.48	8.03583	262.396	0.209208	0.000797298
3.432	12574.8	1561.42	8.05074	262.128	0.2105	0.000803044
3.456	12380.4	1533.26	8.06424	261.885	0.212001	0.000809518
3.48	12191.4	1507.68	8.0746	261.7	0.213472	0.000815714
3.504	12005.6	1481.71	8.08578	261.5	0.214982	0.000822112
3.528	11823.6	1457.65	8.09586	261.321	0.216439	0.000828252
3.552	11637.2	1435.13	8.10624	261.136	0.217827	0.00083415
3.576	11455.4	1412.48	8.115	260.981	0.219303	0.000840303
3.6	11288.8	1393.3	8.12316	260.837	0.213786	0.000819618
3.624	11115.6	1367.52	8.13357	260.653	0.215451	0.000826582
3.648	10950.1	1346.24	8.14489	260.454	0.216807	0.00083242
3.672	10789.8	1322.73	8.15613	260.257	0.218361	0.000839019
3.696	10623.6	1303.55	8.16727	260.062	0.219643	0.000844579
3.72	10466.4	1281.97	8.1782	259.872	0.221138	0.00085095
3.744	10306	1256.73	8.19149	259.641	0.222897	0.000858482
3.768	10154.2	1234.24	8.20419	259.421	0.224498	0.000865382
3.792	9999.33	1214.24	8.21546	259.226	0.225988	0.000871779
3.816	9850	1196.64	8.22641	259.037	0.227319	0.000877551
3.84	9718.6	1180.83	8.23849	258.83	0.221846	0.000857113
3.864	9577.34	1161.11	8.25344	258.574	0.223253	0.000863402
3.888	9435.37	1141.2	8.26934	258.303	0.224693	0.000869879
3.912	9297.54	1125.91	8.28312	258.069	0.225818	0.000875029
3.936	9160.57	1106.66	8.29719	257.831	0.227324	0.00088168
3.96	9028	1089.97	8.31253	257.572	0.228591	0.000887483
3.984	8899.6	1068.54	8.32922	257.292	0.230301	0.000895096
4.008	8773.49	1047.51	8.34497	257.029	0.232056	0.000902839
4.032	8647.26	1032.06	8.36049	256.77	0.233312	0.000908642
4.056	8521.94	1015.74	8.3776	256.486	0.234642	0.000914833
4.08	8415.76	1001.86	8.39592	256.184	0.229231	0.00089479
4.104	8293.46	985.676	8.41533	255.864	0.23051	0.000900905
4.128	8174	970.595	8.43462	255.549	0.23171	0.000906714
4.152	8061.62	955.324	8.4523	255.261	0.233003	0.000912804
4.176	7947.19	940.946	8.47353	254.917	0.234133	0.00091847
4.2	7840.08	924.622	8.49632	254.549	0.235462	0.000925014
4.224	7728.95	909.676	8.51885	254.188	0.23669	0.00093116
4.248	7620.11	892.189	8.54408	253.786	0.238177	0.000938495
4.272	7510.78	876.405	8.57039	253.369	0.239481	0.000945185
4.296	7406.46	860	8.59875	252.923	0.240841	0.000952233
4.32	7311.05	846.128	8.62865	252.455	0.235586	0.00093318
4.344	7210.08	833.744	8.65875	251.988	0.236442	0.000938305
4.368	7109.95	818.026	8.68844	251.531	0.237775	0.00094531
4.392	7014.59	805.256	8.7133	251.15	0.238901	0.000951225
4.416	6918.36	790.615	8.73615	250.802	0.240379	0.000958439
4.44	6822.54	777.513	8.75685	250.489	0.241756	0.000965137
4.464	6735.15	764.462	8.77619	250.198	0.243194	0.000972008
4.488	6643.31	752.949	8.79557	249.907	0.244459	0.000978201
4.512	6548.1	742.897	8.81355	249.638	0.245591	0.000983787
4.536	6457.72	732.051	8.83016	249.391	0.246903	0.000990026
4.56	6373.56	721	8.84438	249.18	0.242209	0.000972023
4.584	6287.54	710.195	8.8575	248.986	0.243646	0.000978552
4.608	6197.73	699.439	8.87089	248.789	0.245112	0.000985223
4.632	6115.51	687.951	8.88583	248.57	0.246675	0.000992378
4.656	6026.46	677.61	8.90366	248.309	0.248023	0.000998848
4.68	5945.98	667.561	8.92068	248.061	0.249365	0.00100526
4.704	5863.54	657.415	8.93686	247.826	0.250789	0.00101196
4.728	5785.56	645.878	8.95625	247.545	0.252392	0.00101958
4.752	5706.95	635	8.97644	247.255	0.253905	0.0010269
4.776	5628.02	624.61	8.99356	247.009	0.255467	0.00103424
4.8	5561.02	617.302	9.01067	246.765	0.250434	0.00101487
4.824	5488.14	608.581	9.02711	246.531	0.251732	0.00102109
4.848	5416.95	597.465	9.04422	246.289	0.253495	0.00102926
4.872	5343.81	588.326	9.05941	246.075	0.254989	0.00103623
4.896	5268.7	580.395	9.07339	245.878	0.256322	0.00104248
4.92	5196.95	572.233	9.08509	245.714	0.257794	0.00104916
4.944	5127.67	564.233	9.09963	245.51	0.259177	0.00105567
4.968	5060.02	555.605	9.11476	245.299	0.260705	0.0010628
4.992	4990.63	546.93	9.12563	245.148	0.262416	0.00107044
5.016	4925.79	538.86	9.136	245.004	0.26404	0.0010777
5.04	4867.09	532.556	9.14674	244.856	0.259317	0.00105906
5.064	4799.42	523.467	9.15659	244.72	0.261227	0.00106745
5.088	4739.36	516.022	9.16659	244.582	0.262786	0.00107443
5.112	4676.36	509.067	9.17469	244.471	0.264332	0.00108124
5.136	4612.27	501.489	9.18075	244.388	0.266125	0.00108895
5.16	4552.36	495.044	9.18636	244.311	0.267685	0.00109567
5.184	4490.36	488.6	9.19219	244.231	0.269276	0.00110255
5.208	4432.38	481.889	9.19569	244.183	0.271028	0.00110994
5.232	4373.78	475.6	9.19687	244.167	0.27278	0.00111719
5.256	4320.4	470.044	9.19771	244.155	0.274369	0.00112375
5.28	4271.06	464.106	9.19743	244.159	0.270172	0.00110654
5.304	4215.28	458.021	9.19729	244.161	0.271964	0.00111387
5.328	4163.36	452.191	9.19802	244.151	0.273683	0.00112096
5.352	4107.53	446.596	9.20124	244.107	0.275308	0.00112781
5.376	4051.4	440.596	9.20765	244.02	0.276981	0.00113507
5.4	3998.66	434.915	9.21724	243.889	0.278487	0.00114186
5.424	3948.26	429.426	9.2237	243.801	0.280059	0.00114872
5.448	3900.47	424.043	9.23368	243.666	0.281512	0.00115532
5.472	3855.79	417.596	9.24546	243.506	0.283253	0.00116323
5.496	3805.91	410.702	9.2588	243.326	0.285147	0.00117187
5.52	3762.27	404.673	9.27243	243.143	0.280871	0.00115517
5.544	3714.06	400.49	9.28805	242.933	0.281882	0.00116033
5.568	3667.04	393.755	9.30493	242.707	0.283696	0.00116888
5.592	3622.24	387.959	9.32082	242.496	0.285274	0.00117641
5.616	3577.47	382.857	9.3336	242.326	0.286756	0.00118335
5.64	3534.98	378.265	9.34502	242.175	0.288129	0.00118976
5.664	3494.08	373.061	9.3561	242.028	0.28975	0.00119717
5.688	3452.41	368.061	9.36996	241.845	0.29125	0.00120428
5.712	3410.08	363.816	9.38123	241.697	0.292596	0.00121059
5.736	3371.53	359.673	9.39046	241.576	0.293981	0.00121693
5.76	3333.59	354.922	9.39784	241.48	0.289822	0.00120019
5.784	3295.51	349.882	9.40751	241.353	0.291556	0.00120801
5.808	3252.06	345	9.41736	241.225	0.293289	0.00121583
5.832	3212.27	340.392	9.42621	241.11	0.294969	0.00122338
5.856	3171.59	336.039	9.43635	240.978	0.296548	0.0012306
5.88	3130.31	332.118	9.44768	240.831	0.297949	0.00123717
5.904	3091.04	327.039	9.45975	240.675	0.299825	0.00124576
5.928	3053.9	322.333	9.47517	240.476	0.301472	0.00125365
5.952	3014.92	318.118	9.48914	240.297	0.303006	0.00126096
5.976	2975.73	313.745	9.50507	240.093	0.304581	0.0012686
6	2944	309.943	9.5221	239.875	0.30004	0.00125082
6.024	2909.7	305.472	9.54083	239.637	0.301588	0.00125852
6.048	2877.83	300.132	9.55719	239.43	0.303638	0.00126817
6.072	2843.42	296.811	9.57269	239.234	0.304846	0.00127426
6.096	2809.85	292.321	9.59056	239.009	0.306553	0.0012826
6.12	2779.42	288.755	9.6094	238.773	0.307811	0.00128913
6.144	2745.85	285.094	9.62954	238.522	0.30912	0.00129598
6.168	2711.19	281.491	9.64902	238.28	0.31046	0.00130292
6.192	2678.36	277.698	9.66448	238.088	0.31205	0.00131065
6.216	2648.66	273.792	9.68352	237.853	0.313604	0.00131848
6.24	2621.53	270.491	9.70341	237.609	0.309059	0.00130071
6.264	2592.24	266.691	9.72465	237.349	0.31053	0.00130833
6.288	2561.51	263	9.74697	237.077	0.311956	0.00131584
6.312	2531.93	259.455	9.77305	236.761	0.313215	0.00132292
6.336	2503.22	255.709	9.80039	236.431	0.314576	0.00133052
6.36	2473.47	251.6	9.82484	236.138	0.316286	0.00133942
6.384	2445.07	248	9.84716	235.871	0.317813	0.0013474
6.408	2417.15	244.727	9.86891	235.613	0.319204	0.00135478
6.432	2388.53	240.818	9.89157	235.344	0.32099	0.00136392
6.456	2359.45	237.236	9.91421	235.078	0.322632	0.00137245
6.48	2335.02	234.842	9.93834	234.795	0.31777	0.00135339
6.504	2308.4	232.298	9.9618	234.521	0.318769	0.00135923
6.528	2281.56	229.088	9.98292	234.276	0.320291	0.00136715
6.552	2255.19	225.772	10.0042	234.03	0.321913	0.00137552
6.576	2228.54	222.684	10.022	233.825	0.323543	0.0013837
6.6	2204.28	219.228	10.034	233.687	0.325628	0.00139344
6.624	2179.25	216	10.0467	233.541	0.327594	0.00140273
6.648	2153.21	213.368	10.0579	233.413	0.329243	0.00141056
6.672	2126	210.263	10.0662	233.318	0.331367	0.00142023
6.696	2103.11	207.947	10.0714	233.259	0.333033	0.00142774
6.72	2080.71	206.458	10.0777	233.187	0.328369	0.00140818
6.744	2056.61	203.983	10.0807	233.153	0.330253	0.00141646
6.768	2033.1	202.085	10.0802	233.159	0.33185	0.00142327
6.792	2009.47	199.932	10.0807	233.153	0.333628	0.00143094
6.816	1988.29	197.915	10.0784	233.179	0.335406	0.00143841
6.84	1966.85	195.186	10.0782	233.182	0.337704	0.00144824
6.864	1947.05	193.017	10.0833	233.124	0.33941	0.00145592
6.888	1925.07	190.915	10.0893	233.056	0.341082	0.00146352
6.912	1904.2	188.576	10.0978	232.959	0.342884	0.00147186
6.936	1881.9	186.593	10.1103	232.818	0.344301	0.00147884
6.96	1864.23	184.377	10.1269	232.63	0.340052	0.00146177
6.984	1842.52	181.803	10.1402	232.481	0.341976	0.00147098
7.008	1822.26	179.574	10.1551	232.314	0.343576	0.00147893
7.032	1800.82	177.344	10.1702	232.145	0.345216	0.00148707
7.056	1780.97	174.803	10.1844	231.987	0.347191	0.0014966
7.08	1762.56	172.311	10.1996	231.817	0.34912	0.00150601
7.104	1744.2	170.623	10.2157	231.639	0.350313	0.00151232
7.128	1724.13	168.18	10.2301	231.479	0.352318	0.00152203
7.152	1707.67	166.607	10.2429	231.338	0.353548	0.00152828
7.176	1688.13	164.639	10.2571	231.182	0.355169	0.00153632
7.2	1671.1	162.984	10.2735	231.002	0.350711	0.00151821
7.224	1653.9	160.762	10.2861	230.864	0.35265	0.00152753
7.248	1636.13	158.952	10.3	230.713	0.354181	0.00153516
7.272	1618.6	157.317	10.314	230.56	0.355552	0.00154212
7.296	1601.52	155.333	10.3301	230.386	0.357241	0.00155062
7.32	1585.6	152.921	10.3485	230.187	0.359337	0.00156107
7.344	1568.7	151.302	10.3657	230.001	0.360674	0.00156814
7.368	1549.76	149.381	10.3821	229.825	0.362419	0.00157693
7.392	1534.97	147.508	10.3975	229.66	0.364142	0.00158557
7.416	1518	145.587	10.4167	229.455	0.365848	0.00159442
7.44	1504.51	143.892	10.4353	229.257	0.361623	0.00157737
7.464	1487.34	142.431	10.4503	229.098	0.362989	0.00158443
7.488	1471.2	140.538	10.4688	228.902	0.364762	0.00159352
7.512	1454.91	139.062	10.4852	228.73	0.366151	0.0016008
7.536	1438.6	137	10.5017	228.557	0.368278	0.00161132
7.56	1422.69	135.308	10.5194	228.372	0.369952	0.00161996
7.584	1407.98	133.662	10.5345	228.214	0.37168	0.00162865
7.608	1392.68	131.738	10.5502	228.051	0.373789	0.00163906
7.632	1377.43	130.508	10.5661	227.885	0.37503	0.0016457
7.656	1362.03	128.646	10.5831	227.709	0.377099	0.00165606
7.68	1349.4	127.045	10.5941	227.596	0.373339	0.00164036
7.704	1334.87	125.672	10.605	227.483	0.375	0.00164847
7.728	1319.15	124.269	10.6138	227.393	0.376821	0.00165714
7.752	1305.79	122.687	10.6209	227.32	0.378958	0.00166707
7.776	1292.12	121.328	10.6275	227.253	0.380837	0.00167583
7.8	1278.51	120.373	10.6326	227.2	0.382212	0.00168227
7.824	1265.09	118.955	10.6361	227.164	0.38434	0.00169191
7.848	1251.58	117.731	10.6424	227.1	0.386121	0.00170022
7.872	1238.36	116.284	10.6519	227.003	0.388156	0.00170992
7.896	1225.57	115.328	10.6624	226.897	0.389431	0.00171634
7.92	1214.35	114.087	10.6756	226.762	0.385344	0.00169933
7.944	1201.48	112.71	10.6915	226.6	0.387112	0.00170835
7.968	1189.49	111.261	10.7061	226.453	0.389071	0.00171811
7.992	1177.78	109.87	10.7209	226.304	0.390964	0.00172761
8.016	1166.23	108.406	10.7316	226.196	0.393162	0.00173815
8.04	1153.97	106.899	10.7448	226.064	0.395404	0.00174908
8.064	1141.35	105.71	10.7618	225.893	0.397016	0.00175754
8.088	1130.67	104.739	10.7831	225.681	0.398107	0.00176402
8.112	1119.61	103.725	10.8043	225.47	0.399303	0.00177098
8.136	1108.68	102.971	10.8274	225.241	0.399991	0.00177583
8.16	1100.06	102.127	10.8533	224.986	0.395041	0.00175584
8.184	1089.45	100.577	10.8757	224.767	0.397201	0.00176717
8.208	1078.93	99.0423	10.9009	224.52	0.399294	0.00177843
8.232	1067.04	97.6761	10.9275	224.261	0.401102	0.00178855
8.256	1056.31	96.2535	10.957	223.976	0.402953	0.00179909
8.28	1046.86	94.8028	10.9888	223.669	0.404808	0.00180985
8.304	1035.55	93.7887	11.0229	223.343	0.405805	0.00181696
8.328	1024.62	92.5211	11.0549	223.039	0.407414	0.00182665
8.352	1014.65	91.507	11.0859	222.746	0.408569	0.00183424
8.376	1004.35	90.338	11.1171	222.452	0.410072	0.00184342
8.4	995.548	89.5479	11.148	222.162	0.405141	0.00182362
8.424	984.726	88.3425	11.1732	221.928	0.406992	0.00183389
8.448	974.479	87.137	11.1955	221.721	0.408977	0.00184456
8.472	964.603	85.863	11.2175	221.518	0.41117	0.00185615
8.496	955.658	84.8082	11.2372	221.337	0.412991	0.0018659
8.52	946.671	83.6712	11.2528	221.193	0.415181	0.001877
8.544	936.534	82.7397	11.2693	221.042	0.416934	0.00188622
8.568	927.712	82.1918	11.2824	220.922	0.417915	0.00189168
8.592	918.466	81.1644	11.2919	220.836	0.420179	0.00190268
8.616	909.781	80.4795	11.2985	220.776	0.421752	0.00191032
8.64	901.96	79.8933	11.3005	220.758	0.417567	0.00189152
8.664	892.467	78.9867	11.3032	220.733	0.41985	0.00190207
8.688	882.533	78.16	11.3049	220.718	0.422017	0.00191202
8.712	873.507	77.3867	11.31	220.672	0.423948	0.00192117
8.736	864.733	76.48	11.3145	220.63	0.426266	0.00193203
8.76	856.293	75.84	11.3175	220.604	0.427982	0.00194005
8.784	847.733	74.7333	11.322	220.563	0.430898	0.00195363
8.808	839.293	74.0267	11.3294	220.496	0.432695	0.00196237
8.832	832	73.3467	11.3387	220.411	0.434355	0.00197065
8.856	823.8	72.48	11.3504	220.306	0.436491	0.00198129
8.88	816.545	72.026	11.3612	220.209	0.431804	0.00196088
8.904	809.052	71.3506	11.3744	220.09	0.433371	0.00196906
8.928	802.247	70.4935	11.3846	219.999	0.435573	0.00197989
8.952	794.039	69.6883	11.3955	219.901	0.437673	0.00199031
8.976	786.364	68.8831	11.4027	219.837	0.439931	0.00200117
9	779.455	68.2208	11.4097	219.774	0.441792	0.00201022
9.024	772.169	67.5195	11.4192	219.689	0.443723	0.00201978
9.048	765.558	66.8312	11.426	219.629	0.445727	0.00202946
9.072	757.234	66.0909	11.4301	219.592	0.448064	0.00204043
9.096	750.208	65.6753	11.4363	219.538	0.449309	0.00204662
9.12	744.557	65.0633	11.4432	219.476	0.445383	0.00202931
9.144	738.152	64.519	11.4516	219.402	0.44696	0.00203718
9.168	729.342	63.8987	11.4574	219.35	0.448956	0.00204676
9.192	721.975	63.1899	11.4623	219.307	0.451272	0.00205772
9.216	714.987	62.3797	11.4668	219.267	0.453967	0.00207039
9.24	708.038	61.6076	11.4743	219.2	0.456479	0.00208247
9.264	700.367	60.8101	11.4801	219.149	0.459209	0.00209542
9.288	694.38	60.3797	11.4864	219.094	0.460635	0.00210246
9.312	687.456	59.7342	11.4941	219.026	0.462819	0.00211308
9.336	681.43	59.2152	11.4987	218.986	0.464674	0.00212193
9.36	675.975	58.7531	11.5014	218.962	0.460606	0.00210359
9.384	670.111	58.2346	11.5038	218.941	0.462561	0.00211272
9.408	664.63	57.7407	11.5047	218.933	0.464495	0.00212163
9.432	658.951	57.3086	11.5089	218.896	0.466104	0.00212934
9.456	652.84	56.8889	11.5164	218.83	0.467575	0.00213671
9.48	646.79	56.284	11.5248	218.756	0.469739	0.00214732
9.504	641.506	55.6914	11.5356	218.663	0.471782	0.00215758
9.528	635.136	55.0988	11.5508	218.529	0.473721	0.00216777
9.552	628.951	54.4691	11.5658	218.399	0.47585	0.00217881
9.576	623.358	53.7778	11.5837	218.243	0.478144	0.00219088
9.6	618.169	53.2892	11.6071	218.041	0.473616	0.00217214
9.624	612.675	52.7108	11.632	217.826	0.47523	0.00218169
9.648	607.518	52.0361	11.6542	217.636	0.477384	0.00219349
9.672	601.639	51.5301	11.6792	217.422	0.478779	0.00220207
9.696	595.747	50.9398	11.7037	217.213	0.480588	0.00221251
9.72	590.88	50.3614	11.7245	217.037	0.482493	0.00222309
9.744	585.47	49.759	11.7442	216.871	0.484609	0.00223455
9.768	580.181	49.3253	11.7599	216.738	0.486147	0.00224301
9.792	574.904	48.7108	11.7736	216.623	0.488617	0.00225561
9.816	569.205	48.1687	11.789	216.493	0.490749	0.00226681
9.84	564.859	47.7882	11.7996	216.405	0.486464	0.00224793
9.864	559.4	47.3412	11.8124	216.298	0.488278	0.00225743
9.888	554.271	46.9882	11.8216	216.221	0.489791	0.00226524
9.912	549.706	46.4824	11.8357	216.104	0.491867	0.00227607
9.936	543.894	45.9176	11.8447	216.028	0.494508	0.00228909
9.96	538.329	45.5765	11.8526	215.963	0.49611	0.0022972
9.984	532.918	44.8824	11.8554	215.94	0.499721	0.00231417
10.008	526.929	44.4	11.8588	215.912	0.502308	0.00232645
10.032	522.106	43.8118	11.8636	215.872	0.505403	0.00234121
10.056	517.659	43.4941	11.8675	215.839	0.507116	0.0023495
10.08	513.345	43.1264	11.8691	215.826	0.503321	0.00233207
10.104	509.333	42.977	11.8743	215.784	0.504082	0.00233605
10.128	504.379	42.5517	11.8752	215.776	0.506555	0.0023476
10.152	499.943	42.1954	11.876	215.769	0.508665	0.00235745
10.176	495.529	41.7471	11.8739	215.787	0.511438	0.00237011
10.2	490.862	41.3793	11.8763	215.767	0.513623	0.00238045
10.224	486.195	40.9655	11.8774	215.758	0.516158	0.0023923
10.248	481.368	40.5057	11.8844	215.7	0.518773	0.00240507
10.272	476.989	40.1609	11.8889	215.663	0.52083	0.00241502
10.296	472.437	39.7241	11.8964	215.601	0.523358	0.00242743
10.32	468.427	39.2697	11.904	215.539	0.520066	0.00241287
10.344	464.427	38.9775	11.913	215.464	0.521674	0.00242116
10.368	460.258	38.5843	11.9246	215.369	0.523841	0.00243229
10.392	455.764	38.2921	11.9396	215.247	0.525281	0.00244037
10.416	451.225	37.8202	11.9537	215.131	0.527931	0.002454
10.44	446.584	37.3596	11.9659	215.032	0.530647	0.00246776
10.464	442.461	36.9888	11.9755	214.953	0.532897	0.00247913
10.488	438.18	36.5281	11.9898	214.838	0.535612	0.0024931
10.512	433.888	36.0112	12.005	214.714	0.538732	0.00250906
10.536	430.067	35.7416	12.0215	214.581	0.540116	0.00251707
10.56	426.747	35.4835	12.0386	214.442	0.535406	0.00249673
10.584	422.659	35.1209	12.0518	214.337	0.537618	0.00250829
10.608	418.67	34.6813	12.0647	214.233	0.540425	0.00252261
10.632	414.846	34.2967	12.0795	214.114	0.542806	0.00253512
10.656	411.385	34.044	12.0918	214.016	0.544339	0.00254344
10.68	407.934	33.6593	12.1056	213.906	0.546815	0.00255633
10.704	403.769	33.3736	12.1226	213.771	0.548493	0.0025658
10.728	399.978	33.044	12.1438	213.603	0.550345	0.00257649
10.752	395.604	32.5385	12.1679	213.412	0.553521	0.00259367
10.776	392.022	32.1758	12.194	213.206	0.555514	0.00260552
10.8	388.86	31.914	12.229	212.932	0.550339	0.00258457
10.824	385.71	31.5806	12.2594	212.695	0.551953	0.00259505
10.848	382.011	31.1398	12.2904	212.454	0.554497	0.00260996
10.872	378.731	30.6989	12.3161	212.255	0.557301	0.00262562
10.896	375.097	30.2903	12.3349	212.111	0.560205	0.00264109
10.92	372.043	29.8387	12.3493	212	0.563696	0.00265894
10.944	368.409	29.5806	12.3656	211.875	0.565505	0.00266905
10.968	364.624	29.3118	12.3778	211.782	0.567618	0.0026802
10.992	360.968	29.1398	12.3817	211.753	0.569223	0.00268815
11.016	357.505	28.914	12.3833	211.74	0.571413	0.00269865
11.04	354.674	28.7368	12.3825	211.746	0.567176	0.00267857
11.064	351.147	28.4	12.3705	211.838	0.570986	0.00269539
11.088	347.937	28.1789	12.3612	211.909	0.573635	0.00270699
11.112	344.547	27.9895	12.3542	211.963	0.575933	0.00271714
11.136	341.779	27.6632	12.3516	211.982	0.579347	0.002733
11.16	338.421	27.3474	12.3519	211.98	0.582636	0.00274854
11.184	334.768	27.1368	12.3554	211.954	0.584814	0.00275916
11.208	331.821	26.8632	12.3553	211.955	0.587761	0.00277305
11.232	328.695	26.5895	12.3524	211.976	0.590882	0.00278749
11.256	325.768	26.3579	12.3396	212.075	0.594029	0.00280103
11.28	323.34	26.1443	12.3221	212.21	0.591006	0.00278501
11.304	320.732	25.9072	12.3033	212.355	0.594494	0.00279953
11.328	317.495	25.6804	12.2864	212.486	0.597878	0.00281374
11.352	314.763	25.5567	12.2728	212.591	0.600003	0.00282234
11.376	311.99	25.6392	12.2549	212.73	0.600096	0.00282093
11.4	309.072	25.4124	12.237	212.87	0.603571	0.0028354
11.424	306.588	25.1959	12.2251	212.963	0.606676	0.00284875
11.448	303.515	24.9794	12.2087	213.091	0.610069	0.00286295
11.472	300.67	24.6392	12.1939	213.207	0.614835	0.00288375
11.496	297.722	24.4742	12.1866	213.264	0.617308	0.00289457
11.52	295.465	24.2929	12.1916	213.225	0.613095	0.00287534
11.544	292.323	23.8889	12.1902	213.236	0.618179	0.00289904
11.568	289.333	23.7172	12.1846	213.281	0.620745	0.00291046
11.592	286.414	23.4747	12.1803	213.314	0.624134	0.00292589
11.616	283.657	23.1818	12.1712	213.386	0.62842	0.00294499
11.64	281.263	23.0101	12.1673	213.417	0.630967	0.0029565
11.664	278.889	22.9596	12.1647	213.437	0.631933	0.00296074
11.688	276.475	22.8384	12.1518	213.539	0.634296	0.00297039
11.712	274.111	22.6465	12.1377	213.651	0.637645	0.00298452
11.736	271.758	22.4545	12.1204	213.788	0.641191	0.00299919
11.76	269.683	22.2475	12.1004	213.947	0.638669	0.00298517
11.784	267.307	22.0297	12.0808	214.104	0.642736	0.00300198
11.808	264.762	21.8911	12.066	214.222	0.64556	0.00301351
11.832	262.366	21.7822	12.0492	214.358	0.648092	0.00302341
11.856	259.475	21.604	12.0317	214.499	0.651688	0.00303819
11.88	257.099	21.396	12.0099	214.675	0.65591	0.00305537
11.904	255.01	21.2376	11.9796	214.92	0.659875	0.00307033
11.928	252.505	21.0693	11.9458	215.196	0.664254	0.00308675
11.952	249.97	20.9703	11.9138	215.458	0.667583	0.00309844
11.976	247.426	20.7723	11.8877	215.673	0.672119	0.00311638
12	245.32	20.6796	11.8635	215.873	0.668391	0.00309623
12.024	242.883	20.6019	11.8434	216.04	0.67085	0.00310521
12.048	240.835	20.4757	11.8216	216.221	0.674106	0.00311767
12.072	238.728	20.3301	11.7971	216.426	0.67784	0.00313198
12.096	236.398	20.1068	11.7829	216.545	0.68231	0.0031509
12.12	234.447	19.9612	11.7694	216.658	0.685542	0.00316416
12.144	232.34	19.699	11.7617	216.723	0.690387	0.00318557
12.168	230.214	19.5631	11.7623	216.718	0.692809	0.00319683
12.192	228.165	19.4757	11.7596	216.74	0.694628	0.00320488
12.216	226.369	19.2427	11.7602	216.735	0.698673	0.00322363
12.24	224.943	19.1238	11.7588	216.747	0.694216	0.00320288
12.264	223	18.9333	11.7564	216.768	0.697795	0.00321909
12.288	221.095	18.7429	11.7512	216.811	0.70157	0.00323586
12.312	219.343	18.6952	11.7492	216.828	0.702723	0.00324092
12.336	217.086	18.4762	11.7537	216.791	0.706591	0.00325932
12.36	215.371	18.3429	11.7483	216.836	0.709467	0.00327191
12.384	213.495	18.219	11.7387	216.917	0.712466	0.00328451
12.408	211.171	17.9905	11.7316	216.977	0.717326	0.003306
12.432	209.514	17.8381	11.7183	217.09	0.721115	0.00332173
12.456	207.505	17.6381	11.7119	217.144	0.725506	0.00334113
12.48	205.991	17.5981	11.704	217.211	0.720097	0.0033152
12.504	203.925	17.4953	11.6953	217.285	0.722819	0.0033266
12.528	202.514	17.3084	11.6851	217.372	0.727187	0.00334536
12.552	200.766	17.2336	11.6715	217.488	0.729663	0.00335496
12.576	199.355	17.0935	11.6597	217.589	0.7333	0.00337012
12.6	197.607	16.9439	11.6458	217.708	0.737338	0.00338681
12.624	195.701	16.8037	11.638	217.775	0.740904	0.00340215
12.648	194.15	16.729	11.6355	217.796	0.742804	0.00341054
12.672	192.57	16.6168	11.6226	217.907	0.746108	0.00342397
12.696	190.832	16.4299	11.6118	218	0.750914	0.00344456
12.72	189.404	16.3119	11.6014	218.091	0.747306	0.00342659
12.744	187.936	16.1743	11.5868	218.217	0.751327	0.00344303
12.768	186.385	16.0275	11.577	218.302	0.755324	0.00346
12.792	184.725	15.9817	11.5715	218.349	0.756917	0.00346654
12.816	183.33	15.8991	11.5635	218.419	0.759435	0.00347697
12.84	181.798	15.7431	11.5515	218.524	0.763879	0.00349563
12.864	180.339	15.6789	11.5442	218.587	0.766005	0.00350435
12.888	179	15.5138	11.539	218.633	0.770299	0.00352325
12.912	177.532	15.3761	11.533	218.685	0.774087	0.00353973
12.936	176.101	15.3119	11.5306	218.706	0.775978	0.00354804
12.96	174.919	15.2342	11.5312	218.7	0.770924	0.00352503
12.984	173.288	15.027	11.5325	218.689	0.776006	0.00354845
13.008	171.964	14.8739	11.5301	218.71	0.780062	0.00356665
13.032	170.532	14.7477	11.5268	218.739	0.783594	0.00358232
13.056	169.036	14.6577	11.5182	218.814	0.786622	0.00359493
13.08	167.667	14.5315	11.5091	218.894	0.790589	0.00361174
13.104	166.243	14.3784	11.5	218.974	0.795305	0.00363196
13.128	165	14.3784	11.4812	219.14	0.79675	0.0036358
13.152	163.613	14.2252	11.4606	219.322	0.802282	0.00365802
13.176	162.387	14.1802	11.4447	219.463	0.804731	0.00366682
13.2	161.124	14.1327	11.4281	219.61	0.800133	0.00364342
13.224	159.743	14.0354	11.4079	219.79	0.804274	0.00365928
13.248	158.142	13.9646	11.383	220.013	0.808111	0.00367301
13.272	156.991	13.8496	11.3626	220.196	0.812778	0.00369115
13.296	155.903	13.6903	11.3407	220.393	0.818804	0.00371519
13.32	154.779	13.6372	11.3279	220.51	0.821374	0.00372489
13.344	153.416	13.5575	11.3167	220.611	0.824639	0.00373798
13.368	152.239	13.4867	11.3156	220.621	0.82696	0.00374833
13.392	150.85	13.4071	11.3177	220.602	0.829379	0.00375962
13.416	149.584	13.2832	11.3158	220.619	0.833337	0.00377727
13.44	148.409	13.1217	11.3101	220.671	0.831367	0.00376746
13.464	147.2	13.0522	11.3102	220.67	0.833671	0.00377791
13.488	146.513	12.887	11.315	220.626	0.838389	0.00380005
13.512	145.348	12.8087	11.3158	220.619	0.84096	0.00381182
13.536	144.043	12.7304	11.3138	220.637	0.843776	0.00382427
13.56	142.896	12.6174	11.3084	220.686	0.847895	0.00384208
13.584	141.835	12.4957	11.3004	220.758	0.852495	0.00386166
13.608	140.583	12.3652	11.2951	220.807	0.8573	0.00388258
13.632	139.583	12.3565	11.2817	220.929	0.858775	0.00388711
13.656	138.565	12.3391	11.2717	221.021	0.8603	0.00389239
13.68	137.863	12.3077	11.2684	221.05	0.854321	0.00386482
13.704	136.88	12.1966	11.2636	221.095	0.858479	0.00388286
13.728	135.684	12.094	11.2569	221.156	0.862604	0.00390043
13.752	134.658	12	11.253	221.192	0.866247	0.00391627
13.776	133.598	11.8889	11.2503	221.216	0.870428	0.00393474
13.8	132.846	11.7778	11.2556	221.168	0.874009	0.00395179
13.824	131.701	11.6838	11.2673	221.061	0.876693	0.00396585
13.848	130.598	11.5812	11.2834	220.914	0.879381	0.00398065
13.872	129.53	11.4359	11.3062	220.706	0.883125	0.00400137
13.896	128.462	11.4017	11.3279	220.51	0.883066	0.00400466
13.92	127.58	11.3025	11.3519	220.293	0.877654	0.00398403
13.944	126.437	11.1597	11.3716	220.115	0.881695	0.00400561
13.968	125.496	11.0084	11.3923	219.93	0.886018	0.00402864
13.992	124.538	10.8571	11.4122	219.752	0.890505	0.00405232
14.016	123.647	10.7899	11.4282	219.61	0.892152	0.00406245
14.04	122.84	10.6807	11.4504	219.412	0.894962	0.00407891
14.064	121.924	10.605	11.4719	219.222	0.896601	0.00408993
14.088	120.983	10.521	11.4914	219.05	0.898759	0.00410298
14.112	120.076	10.4454	11.5031	218.947	0.901169	0.00411592
14.136	119.084	10.3529	11.508	218.904	0.904808	0.00413335
14.16	118.157	10.2645	11.5056	218.925	0.901305	0.00411695
14.184	117.248	10.1736	11.5031	218.947	0.905462	0.00413552
14.208	116.298	10.0744	11.5032	218.946	0.909838	0.00415553
14.232	115.289	10	11.5045	218.935	0.913165	0.00417095
14.256	114.289	9.91736	11.5107	218.88	0.916523	0.00418733
14.28	113.289	9.90909	11.5205	218.795	0.91648	0.00418877
14.304	112.273	9.78512	11.5229	218.773	0.921954	0.0042142
14.328	111.372	9.68595	11.5244	218.76	0.92647	0.0042351
14.352	110.57	9.60331	11.5232	218.771	0.930493	0.00425327
14.376	109.711	9.4876	11.531	218.703	0.935403	0.00427705
14.4	109.114	9.39837	11.5318	218.695	0.93195	0.00426141
14.424	108.252	9.38211	11.54	218.624	0.93238	0.00426476
14.448	107.439	9.30894	11.5357	218.661	0.936343	0.00428217
14.472	106.675	9.25203	11.5301	218.71	0.939678	0.00429645
14.496	105.951	9.12195	11.5216	218.785	0.946724	0.00432719
14.52	105.114	9.11382	11.5136	218.855	0.948019	0.00433172
14.544	104.358	9.05691	11.4933	219.033	0.952579	0.00434901
14.568	103.309	9.04065	11.4772	219.175	0.954985	0.00435718
14.592	102.65	8.97561	11.4603	219.325	0.959719	0.00437579
14.616	101.943	8.92683	11.4501	219.415	0.963183	0.00438979
14.64	101.352	8.832	11.4291	219.601	0.962011	0.00438071
14.664	100.568	8.832	11.4117	219.756	0.963671	0.00438518
14.688	99.8	8.784	11.3952	219.904	0.967682	0.00440048
14.712	99.104	8.728	11.3896	219.954	0.971248	0.00441569
14.736	98.472	8.624	11.381	220.031	0.977554	0.0044428
14.76	97.624	8.576	11.3755	220.081	0.980847	0.00445676
14.784	96.816	8.536	11.3583	220.235	0.98467	0.00447099
14.808	95.992	8.464	11.3412	220.389	0.990237	0.00449312
14.832	95.288	8.384	11.33	220.49	0.995772	0.00451618
14.856	94.544	8.336	11.3189	220.591	0.999637	0.00453163
14.88	93.8268	8.25984	11.2961	220.798	0.998097	0.00452042
14.904	93.1339	8.25197	11.2784	220.959	1.0003	0.00452707
14.928	92.3228	8.24409	11.2643	221.088	1.00226	0.00453331
14.952	91.7717	8.16535	11.2507	221.212	1.00807	0.00455701
14.976	91.1811	8.11811	11.2383	221.326	1.01206	0.00457272
15	90.315	8.08661	11.2294	221.408	1.01502	0.00458438
15.024	89.685	8.01575	11.2144	221.547	1.0207	0.00460714
15.048	89.0551	7.96063	11.2079	221.606	1.02478	0.00462433
15.072	88.2992	7.88976	11.211	221.578	1.0291	0.00464439
15.096	87.5354	7.79528	11.2124	221.565	1.03504	0.00467152
	87.0698	7.74419	11.2201
	86.2558	7.70543	11.2316
	85.5504	7.62791	11.2423
	84.8915	7.55814	11.2623
	84.3721	7.49612	11.2776
	83.7752	7.4031	11.2933
	83.2636	7.37209	11.3069
	82.5659	7.30233	11.3292
	81.969	7.18605	11.3499
	81.3721	7.16279	11.373
	80.855	7.0916	11.3994
	80.0992	7.03053	11.418
	79.374	6.93893	11.4391
	78.7939	6.8855	11.4569
	78.2137	6.80916	11.4638
	77.7328	6.73282	11.4752
	77.1298	6.69466	11.4788
	76.5496	6.64122	11.4825
	76.0382	6.61069	11.479
	75.5573	6.58015	11.4796
	75.218	6.54887	11.4739
	74.7594	6.53383	11.4625
	74.0977	6.4812	11.4565
	73.5489	6.45113	11.4431
	73.0902	6.38346	11.4326
	72.5789	6.35338	11.4243
	72.0451	6.30827	11.4148
	71.6541	6.25564	11.4077
	71.0977	6.24812	11.4075
	70.5489	6.19549	11.4102
	70.037	6.14815	11.411
	69.4667	6.1037	11.4129
	68.9407	6.06667	11.4196
	68.4963	5.99259	11.4206
	68.0741	5.95556	11.4194
	67.6519	5.9037	11.4156
	67.1407	5.86667	11.4194
	66.7556	5.80741	11.4212
	66.1556	5.77037	11.4194
	65.5852	5.77037	11.4168
	65.0073	5.72993	11.4144
	64.5109	5.64234	11.4062
	63.9124	5.60584	11.4009
	63.4307	5.59124	11.3908
	63	5.52555	11.3805
	62.5912	5.48905	11.3756
	62.1606	5.46715	11.3677
	61.8321	5.43066	11.3485
	61.3212	5.38686	11.3378
	60.8175	5.35766	11.3247
	60.5468	5.35252	11.3065
	60.0216	5.33094	11.2874
	59.5827	5.30935	11.2688
	59.1727	5.2446	11.2557
	58.9065	5.25899	11.2381
	58.5036	5.22302	11.227
	58.3022	5.20863	11.2189
	57.9928	5.19424	11.2256
	57.5036	5.11511	11.2366
	56.9137	5.08633	11.2378
	56.5461	5.03546	11.2467
	56.1915	5.00709	11.2681
	55.7801	4.92199	11.295
	55.5106	4.89362	11.319
	55.1986	4.88652	11.3461
	54.9716	4.86525	11.3771
	54.6667	4.78014	11.4042
	54.1064	4.70922	11.4348
	53.6596	4.69504	11.4575
	53.1986	4.60993	11.4825
	52.8951	4.58741	11.5067
	52.4755	4.55245	11.527
	52.1399	4.51049	11.5304
	51.7552	4.46853	11.5213
	51.3497	4.41958	11.5269
	50.9371	4.40559	11.5256
	50.6014	4.39161	11.5251
	50.3077	4.38462	11.5248
	49.9371	4.38462	11.5199
	49.5804	4.31469	11.5095
