# Supplementary material for: Tropospheric temperature measurements with the pure rotational Raman lidar technique using nonlinear calibration functions
Source: Copernicus journal article supplement (doi:10.5194/amt-10-315-2017), 2017-01-27
Supplement: Supplementary file 23 [file 01.04.2015. Temperature profile retrieved using Eq. (20).xlsx]

## Sheet: Лист1
z, km
Altitude	Smoothed signals	Smoothed signals	Smoothed ratio
0.048	1010	96	9.506	243.835	2.70914	0.0111105	A4	0.075	262.05	0.143	264.85	0.82	269.15
0.072	1296.33	125.667	9.29353	246.475	1.86247	0.0075564	-0.0260541	0.156	264.85	0.196	265.85	1.48	267.15
0.096	1733	179.333	9.14579	248.283	1.51565	0.00610453		0.216	265.85	0.291	267.75	2.99	262.65	3	0.0442709
0.12	2039.33	219	9.06602	249.246	1.34855	0.0054105	B4	0.438	269.15	0.493	271.65	5.51	246.65	5.52	0.0850673
0.144	2127	244.667	8.98429	250.223	1.25415	0.00501214	0.00769598	0.551	270.85	0.551	271.35	7.09	235.65	7.08	0.589383
0.168	2101.33	246.333	8.93783	250.773	1.2357	0.00492759		0.826	268.45	0.812	270.25	9.01	219.15	9	0.902375
0.192	1999.33	249.333	8.74533	253.004	1.16346	0.00459858	C4	0.956	267.45	1.212	267.05	11.62	211.65	11.616	0.452032
0.216	1914.33	236	8.57704	254.883	1.12589	0.00441729	0.0288796	1.351	268.25	1.257	266.65
0.24	1882.8	223.4	8.43575	256.396	0.843837	0.00329114		1.463	268.65	1.474	266.45
0.264	1818	220.4	8.34125	257.371	0.813933	0.00316248		1.5	268.45	1.847	265.35
0.288	1776	209.6	8.30479	257.739	0.818427	0.00317541		1.676	267.15	2.977	261.85
0.312	1721	204.8	8.28875	257.899	0.821539	0.00318551		1.895	265.45	3.369	261.05
0.336	1665.8	196.8	8.29572	257.829	0.840765	0.00326094		2.049	265.65	3.553	260.05
0.36	1600.8	197.4	8.30562	257.73	0.845691	0.0032813		2.542	263.25	4.248	256.35
0.384	1578.4	190.8	8.30969	257.69	0.861033	0.00334136		2.945	263.85	4.299	256.05
0.408	1554	187.4	8.32954	257.49	0.877371	0.0034074		3	263.65	5.49	246.85
0.432	1538.8	184.2	8.32789	257.507	0.883886	0.00343248		3.201	263.05	6.549	239.55
0.456	1526.8	188.6	8.32695	257.516	0.874597	0.00339628		3.523	261.45	6.649	238.85
0.48	1502	182.714	8.31697	257.617	0.746623	0.00289819		3.798	260.05	7.07	234.85
0.504	1503.29	177.429	8.33372	257.448	0.762764	0.00296279		4.361	256.05	7.881	228.25
0.528	1486.57	175.571	8.3297	257.488	0.765295	0.00297216		5.252	249.65	8.98	219.25
0.552	1494.14	176.714	8.32041	257.582	0.759354	0.00294801		5.53	247.65	9.088	217.65
0.576	1507.14	179.571	8.30914	257.695	0.749323	0.00290779		5.72	246.45	10.031	211.75
0.6	1531.29	183.286	8.33444	257.44	0.751306	0.00291837		5.991	244.65	10.081	211.45
0.624	1590	191.714	8.35155	257.267	0.741057	0.0028805		6.192	243.05	10.13	211.65
0.648	1672.71	203.286	8.35273	257.255	0.720372	0.00280023		6.903	237.45	10.435	211.95
0.672	1765.57	215.571	8.37047	257.073	0.705687	0.00274508		7.11	235.85	10.54	212.05
0.696	1907	231.714	8.38917	256.881	0.686483	0.00267238		7.771	230.05	11.52	214.65
0.72	2145.56	256.222	8.42053	256.556	0.583516	0.00227443		8.035	228.45	11.713	215.45
0.744	2359.11	280.556	8.45796	256.163	0.566803	0.00221267		9.03	221.65	12.151	215.35
0.768	2637.11	310.778	8.49936	255.723	0.547814	0.00214222		10.19	213.05	12.585	215.25
0.792	2957.67	341.444	8.5524	255.151	0.533394	0.0020905		10.315	212.25	13.051	215.15
0.816	3330.56	384.556	8.59878	254.645	0.511666	0.00200933		10.896	208.45	13.34	215.05
0.84	3758.33	430.111	8.63133	254.285	0.489454	0.00192482		11.175	207.85	15.89	213.45
0.864	4239	483.556	8.64326	254.153	0.463538	0.00182385		11.56	209.25	16.757	212.35
0.888	4755.56	543.556	8.64366	254.148	0.437312	0.0017207		12.042	210.25
0.912	5328.22	604.667	8.62918	254.309	0.412303	0.00162127		12.457	211.05
0.936	5939.44	682.667	8.59296	254.708	0.383094	0.00150405		13.34	212.85
0.96	6680.73	777.909	8.5523	255.152	0.319776	0.00125328		13.551	213.45
0.984	7377.73	867.455	8.49807	255.737	0.296397	0.00115899		14.042	212.95
1.008	8097.18	962.455	8.4361	256.393	0.274161	0.0010693		15.86	211.25
1.032	8841	1061.82	8.36759	257.103	0.253078	0.000984345		15.985	211.05
1.056	9623.55	1164.55	8.28726	257.914	0.232305	0.00090071		15.998	211.05
1.08	10427.5	1269.55	8.20841	258.685	0.213266	0.000824425
1.104	11233.7	1379.82	8.1329	259.398	0.195745	0.000754614
1.128	12053.5	1490.91	8.06077	260.055	0.179847	0.000691573
1.152	12867.5	1609.36	7.99296	260.65	0.165182	0.00063373
1.176	13689.3	1726.64	7.92992	261.182	0.152088	0.000582308
1.2	14465.6	1846.77	7.86698	261.691	0.128515	0.000491096
1.224	15246.9	1965.46	7.80453	262.173	0.117835	0.000449454
1.248	16037.3	2079.62	7.74445	262.614	0.108024	0.000411343
1.272	16832.2	2195.38	7.68471	263.03	0.0986201	0.000374939
1.296	17590.2	2304.54	7.62962	263.392	0.0902154	0.000342514
1.32	18338.1	2422	7.57982	263.701	0.0825534	0.000313057
1.344	19050.5	2531.08	7.53469	263.965	0.0758061	0.000287182
1.368	19726.9	2637.08	7.49271	264.197	0.0696627	0.000263677
1.392	20398	2746.31	7.45424	264.398	0.064054	0.000242264
1.416	21053.6	2849.15	7.4168	264.581	0.0587853	0.000222182
1.44	21620.8	2929.47	7.37997	264.751	0.05019	0.000189575
1.464	22202.9	3026.33	7.34672	264.893	0.0459814	0.000173584
1.488	22756.1	3119.13	7.31426	265.023	0.0419738	0.000158378
1.512	23293.5	3195.93	7.28341	265.138	0.0382957	0.000144437
1.536	23764.9	3275.53	7.25543	265.235	0.034959	0.000131804
1.56	24232.3	3352.67	7.23034	265.315	0.0319805	0.000120538
1.584	24647.6	3420.6	7.20422	265.392	0.0289766	0.000109184
1.608	25016.9	3489.33	7.18051	265.457	0.0262553	9.89062e-05
1.632	25354.8	3550.47	7.1593	265.51	0.0238469	8.98155e-05
1.656	25660.9	3604.2	7.13749	265.559	0.02142	8.06599e-05
1.68	25838.9	3632.41	7.11654	265.602	0.0180011	6.77746e-05
1.704	26068.8	3675.24	7.09663	265.639	0.0159527	6.0054e-05
1.728	26294.9	3716.18	7.07915	265.668	0.0141549	5.32804e-05
1.752	26471.7	3748.29	7.06625	265.687	0.0128305	4.82916e-05
1.776	26617.1	3776.24	7.05482	265.703	0.0116613	4.38883e-05
1.8	26724.6	3804.29	7.04647	265.713	0.0108001	4.06456e-05
1.824	26805.8	3824.65	7.03909	265.722	0.0100477	3.78127e-05
1.848	26869.4	3831.18	7.03329	265.728	0.00946771	3.56293e-05
1.872	26895.4	3827.06	7.02832	265.734	0.0089805	3.37951e-05
1.896	26901.9	3834.65	7.02508	265.737	0.00865266	3.2561e-05
1.92	26818.3	3816	7.02426	265.738	0.00812643	3.05807e-05
1.944	26804.1	3811.58	7.02685	265.735	0.00837383	3.15119e-05
1.968	26735.4	3803.42	7.03261	265.729	0.00892321	3.35801e-05
1.992	26657.9	3796.84	7.03825	265.723	0.00945968	3.55998e-05
2.016	26554.3	3779.05	7.04389	265.716	0.010009	3.76681e-05
2.04	26436.4	3755.42	7.05225	265.706	0.0108223	4.07302e-05
2.064	26298.6	3728.53	7.05967	265.696	0.0115547	4.34885e-05
2.088	26153.1	3698.05	7.0685	265.684	0.0124281	4.67777e-05
2.112	25984.6	3672.53	7.07884	265.669	0.0134398	5.05886e-05
2.136	25817.3	3641.53	7.09194	265.647	0.0147219	5.54188e-05
2.16	25586.9	3600	7.10637	265.622	0.0153673	5.78542e-05
2.184	25375	3569.19	7.12062	265.594	0.0167018	6.28846e-05
2.208	25175.7	3531.24	7.13416	265.566	0.0179927	6.77523e-05
2.232	24946.2	3492.38	7.14789	265.536	0.0193116	7.27267e-05
2.256	24710.8	3448.76	7.16269	265.501	0.0207464	7.81403e-05
2.28	24460.6	3404.19	7.17753	265.464	0.0221979	8.36193e-05
2.304	24214	3364.76	7.19171	265.427	0.0235878	8.88674e-05
2.328	23963.4	3327.19	7.20656	265.386	0.0250398	9.43523e-05
2.352	23698.5	3280.9	7.22237	265.339	0.0266184	0.000100318
2.376	23449.8	3239.71	7.2385	265.29	0.0282179	0.000106367
2.4	23172.8	3195	7.25509	265.236	0.0285575	0.000107668
2.424	22902.5	3153.09	7.27128	265.181	0.0301187	0.000113578
2.448	22622.4	3110.57	7.28892	265.118	0.0318189	0.000120018
2.472	22342.3	3059.17	7.30714	265.051	0.033624	0.000126859
2.496	22065.8	3014.26	7.32446	264.983	0.0353396	0.000133365
2.52	21794	2966.13	7.3425	264.911	0.0371488	0.000140231
2.544	21520.8	2922.65	7.36093	264.833	0.0389826	0.000147197
2.568	21250.2	2875.39	7.37994	264.751	0.0409054	0.000154505
2.592	20973.5	2833.22	7.39916	264.664	0.0428327	0.000161838
2.616	20702.4	2792.43	7.41828	264.574	0.0447582	0.00016917
2.64	20430.3	2747.24	7.43695	264.484	0.044788	0.000169341
2.664	20155.3	2703.4	7.45443	264.397	0.0465599	0.000176098
2.688	19882.9	2660.76	7.47212	264.306	0.0483594	0.000182967
2.712	19602.6	2619.2	7.48865	264.219	0.0500764	0.000189526
2.736	19332.8	2573	7.5055	264.128	0.0518795	0.000196418
2.76	19054.4	2531.88	7.52424	264.024	0.0538146	0.000203824
2.784	18794.8	2492.72	7.54272	263.92	0.0557266	0.00021115
2.808	18534.3	2452.24	7.56212	263.807	0.0577473	0.0002189
2.832	18281.3	2414.28	7.5812	263.693	0.0597364	0.000226538
2.856	18021.7	2375	7.60157	263.568	0.0618661	0.000234725
2.88	17775.6	2332.78	7.62226	263.439	0.0616579	0.00023405
2.904	17522.4	2293.56	7.64279	263.308	0.0637644	0.000242167
2.928	17269.5	2251.89	7.66414	263.168	0.0659902	0.000250754
2.952	17003.3	2213.22	7.68512	263.027	0.0681794	0.00025921
2.976	16747	2172.59	7.70948	262.86	0.0706789	0.000268884
3	16503.2	2131.85	7.73319	262.694	0.0731581	0.000278491
3.024	16261.4	2097.81	7.75641	262.528	0.0755226	0.000287674
3.048	16022.9	2060.89	7.7787	262.365	0.0778876	0.000296867
3.072	15791.1	2027.37	7.79948	262.211	0.0801051	0.000305499
3.096	15559.3	1984.59	7.81958	262.059	0.0824662	0.000314686
3.12	15337.4	1954.07	7.83754	261.921	0.0815042	0.000311179
3.144	15103.7	1917.86	7.85449	261.789	0.0834993	0.000318957
3.168	14878.4	1886.9	7.87205	261.65	0.0854647	0.000326637
3.192	14654.2	1855.55	7.88904	261.515	0.0874216	0.000334289
3.216	14426.7	1825.31	7.90715	261.368	0.0894664	0.0003423
3.24	14205.7	1796.86	7.92218	261.245	0.0912707	0.000349367
3.264	13987.2	1764.34	7.938	261.115	0.0932534	0.000357136
3.288	13778.2	1734.24	7.95325	260.987	0.0951662	0.000364639
3.312	13564	1703.69	7.96856	260.858	0.0971276	0.000372338
3.336	13354.7	1671.79	7.98465	260.721	0.0992136	0.000380535
3.36	13161.7	1644.13	8.00124	260.579	0.0979306	0.00037582
3.384	12964.4	1615.9	8.01912	260.424	0.100039	0.00038414
3.408	12768.2	1587.48	8.03583	260.277	0.102102	0.000392281
3.432	12574.8	1561.42	8.05074	260.145	0.104	0.000399778
3.456	12380.4	1533.26	8.06424	260.024	0.105895	0.000407251
3.48	12191.4	1507.68	8.0746	259.931	0.107518	0.000413642
3.504	12005.6	1481.71	8.08578	259.83	0.109242	0.000420437
3.528	11823.6	1457.65	8.09586	259.739	0.110854	0.000426791
3.552	11637.2	1435.13	8.10624	259.644	0.112467	0.000433158
3.576	11455.4	1412.48	8.115	259.564	0.113993	0.000439173
3.6	11288.8	1393.3	8.12316	259.488	0.111819	0.000430921
3.624	11115.6	1367.52	8.13357	259.392	0.113578	0.000437862
3.648	10950.1	1346.24	8.14489	259.287	0.115263	0.000444539
3.672	10789.8	1322.73	8.15613	259.181	0.117056	0.000451638
3.696	10623.6	1303.55	8.16727	259.077	0.118706	0.000458188
3.72	10466.4	1281.97	8.1782	258.973	0.120461	0.000465149
3.744	10306	1256.73	8.19149	258.847	0.122577	0.000473552
3.768	10154.2	1234.24	8.20419	258.725	0.124568	0.00048147
3.792	9999.33	1214.24	8.21546	258.617	0.126385	0.000488696
3.816	9850	1196.64	8.22641	258.511	0.128093	0.000495505
3.84	9718.6	1180.83	8.23849	258.394	0.126046	0.000487807
3.864	9577.34	1161.11	8.25344	258.247	0.12813	0.000496154
3.888	9435.37	1141.2	8.26934	258.091	0.130327	0.000504964
3.912	9297.54	1125.91	8.28312	257.955	0.132169	0.000512371
3.936	9160.57	1106.66	8.29719	257.815	0.134269	0.000520796
3.96	9028	1089.97	8.31253	257.661	0.136347	0.000529172
3.984	8899.6	1068.54	8.32922	257.493	0.13882	0.000539122
4.008	8773.49	1047.51	8.34497	257.334	0.141253	0.00054891
4.032	8647.26	1032.06	8.36049	257.176	0.143375	0.000557498
4.056	8521.94	1015.74	8.3776	257	0.14569	0.000566887
4.08	8415.76	1001.86	8.39592	256.811	0.14389	0.000560296
4.104	8293.46	985.676	8.41533	256.61	0.146347	0.000570311
4.128	8174	970.595	8.43462	256.408	0.148753	0.000580141
4.152	8061.62	955.324	8.4523	256.222	0.151091	0.000589685
4.176	7947.19	940.946	8.47353	255.998	0.153633	0.000600132
4.2	7840.08	924.622	8.49632	255.755	0.156446	0.000611703
4.224	7728.95	909.676	8.51885	255.514	0.159179	0.000622977
4.248	7620.11	892.189	8.54408	255.241	0.162327	0.000635974
4.272	7510.78	876.405	8.57039	254.955	0.16545	0.000648938
4.296	7406.46	860	8.59875	254.645	0.168795	0.000662864
4.32	7311.05	846.128	8.62865	254.315	0.167571	0.000658912
4.344	7210.08	833.744	8.65875	253.98	0.170644	0.000671878
4.368	7109.95	818.026	8.68844	253.648	0.174029	0.000686106
4.392	7014.59	805.256	8.7133	253.368	0.176875	0.000698097
4.416	6918.36	790.615	8.73615	253.109	0.179828	0.000710477
4.44	6822.54	777.513	8.75685	252.873	0.18254	0.000721864
4.464	6735.15	764.462	8.77619	252.652	0.185197	0.00073301
4.488	6643.31	752.949	8.79557	252.43	0.187734	0.000743706
4.512	6548.1	742.897	8.81355	252.223	0.190062	0.000753548
4.536	6457.72	732.051	8.83016	252.031	0.192426	0.000763501
4.56	6373.56	721	8.84438	251.866	0.189894	0.000753947
4.584	6287.54	710.195	8.8575	251.714	0.192062	0.000763016
4.608	6197.73	699.439	8.87089	251.558	0.194283	0.00077232
4.632	6115.51	687.951	8.88583	251.383	0.196712	0.000782517
4.656	6026.46	677.61	8.90366	251.174	0.199209	0.000793109
4.68	5945.98	667.561	8.92068	250.975	0.201644	0.000803443
4.704	5863.54	657.415	8.93686	250.784	0.204087	0.000813795
4.728	5785.56	645.878	8.95625	250.555	0.20694	0.000825927
4.752	5706.95	635	8.97644	250.316	0.209793	0.000838115
4.776	5628.02	624.61	8.99356	250.112	0.212452	0.000849427
4.8	5561.02	617.302	9.01067	249.909	0.209599	0.000838704
4.824	5488.14	608.581	9.02711	249.712	0.211966	0.00084884
4.848	5416.95	597.465	9.04422	249.508	0.214786	0.00086084
4.872	5343.81	588.326	9.05941	249.325	0.217238	0.000871304
4.896	5268.7	580.395	9.07339	249.157	0.219467	0.000880836
4.92	5196.95	572.233	9.08509	249.017	0.221642	0.00089007
4.944	5127.67	564.233	9.09963	248.841	0.223971	0.000900056
4.968	5060.02	555.605	9.11476	248.658	0.226479	0.000910805
4.992	4990.63	546.93	9.12563	248.527	0.228821	0.000920707
5.016	4925.79	538.86	9.136	248.401	0.231055	0.000930167
5.04	4867.09	532.556	9.14674	248.271	0.227751	0.000917347
5.064	4799.42	523.467	9.15659	248.151	0.230192	0.000927626
5.088	4739.36	516.022	9.16659	248.03	0.232343	0.000936755
5.112	4676.36	509.067	9.17469	247.931	0.234342	0.000945188
5.136	4612.27	501.489	9.18075	247.857	0.236406	0.000953797
5.16	4552.36	495.044	9.18636	247.789	0.238232	0.000961431
5.184	4490.36	488.6	9.19219	247.718	0.240109	0.000969283
5.208	4432.38	481.889	9.19569	247.675	0.241948	0.000976877
5.232	4373.78	475.6	9.19687	247.661	0.243607	0.000983631
5.256	4320.4	470.044	9.19771	247.651	0.245093	0.000989671
5.28	4271.06	464.106	9.19743	247.654	0.241322	0.000974431
5.304	4215.28	458.021	9.19729	247.656	0.242911	0.000980842
5.328	4163.36	452.191	9.19802	247.647	0.244506	0.000987316
5.352	4107.53	446.596	9.20124	247.608	0.246216	0.000994378
5.376	4051.4	440.596	9.20765	247.529	0.24823	0.00100283
5.4	3998.66	434.915	9.21724	247.412	0.250357	0.0010119
5.424	3948.26	429.426	9.2237	247.333	0.252296	0.00102007
5.448	3900.47	424.043	9.23368	247.211	0.254418	0.00102915
5.472	3855.79	417.596	9.24546	247.066	0.256954	0.00104002
5.496	3805.91	410.702	9.2588	246.903	0.259765	0.00105209
5.52	3762.27	404.673	9.27243	246.735	0.256965	0.00104146
5.544	3714.06	400.49	9.28805	246.543	0.259143	0.00105111
5.568	3667.04	393.755	9.30493	246.335	0.262167	0.00106427
5.592	3622.24	387.959	9.32082	246.139	0.264902	0.00107623
5.616	3577.47	382.857	9.3336	245.981	0.267305	0.00108669
5.64	3534.98	378.265	9.34502	245.839	0.269504	0.00109626
5.664	3494.08	373.061	9.3561	245.702	0.271913	0.00110668
5.688	3452.41	368.061	9.36996	245.53	0.274439	0.00111774
5.712	3410.08	363.816	9.38123	245.391	0.276617	0.00112725
5.736	3371.53	359.673	9.39046	245.276	0.278672	0.00113615
5.76	3333.59	354.922	9.39784	245.184	0.275315	0.00112289
5.784	3295.51	349.882	9.40751	245.064	0.277734	0.00113331
5.808	3252.06	345	9.41736	244.942	0.280172	0.00114383
5.832	3212.27	340.392	9.42621	244.831	0.282486	0.0011538
5.856	3171.59	336.039	9.43635	244.705	0.284812	0.0011639
5.88	3130.31	332.118	9.44768	244.564	0.287069	0.0011738
5.904	3091.04	327.039	9.45975	244.413	0.289849	0.0011859
5.928	3053.9	322.333	9.47517	244.221	0.292685	0.00119845
5.952	3014.92	318.118	9.48914	244.046	0.295301	0.00121002
5.976	2975.73	313.745	9.50507	243.847	0.298121	0.00122257
6	2944	309.943	9.5221	243.634	0.295023	0.00121093
6.024	2909.7	305.472	9.54083	243.399	0.298024	0.00122443
6.048	2877.83	300.132	9.55719	243.194	0.301342	0.0012391
6.072	2843.42	296.811	9.57269	242.999	0.303764	0.00125006
6.096	2809.85	292.321	9.59056	242.774	0.306874	0.00126403
6.12	2779.42	288.755	9.6094	242.537	0.309617	0.00127657
6.144	2745.85	285.094	9.62954	242.284	0.312515	0.00128987
6.168	2711.19	281.491	9.64902	242.039	0.315396	0.00130308
6.192	2678.36	277.698	9.66448	241.844	0.318222	0.00131582
6.216	2648.66	273.792	9.68352	241.603	0.321295	0.00132984
6.24	2621.53	270.491	9.70341	241.352	0.318161	0.00131824
6.264	2592.24	266.691	9.72465	241.084	0.321297	0.00133272
6.288	2561.51	263	9.74697	240.802	0.324471	0.00134746
6.312	2531.93	259.455	9.77305	240.472	0.327757	0.00136297
6.336	2503.22	255.709	9.80039	240.126	0.331243	0.00137946
6.36	2473.47	251.6	9.82484	239.816	0.33488	0.0013964
6.384	2445.07	248	9.84716	239.533	0.338168	0.00141178
6.408	2417.15	244.727	9.86891	239.258	0.341271	0.00142638
6.432	2388.53	240.818	9.89157	238.97	0.344868	0.00144314
6.456	2359.45	237.236	9.91421	238.683	0.348312	0.00145931
6.48	2335.02	234.842	9.93834	238.377	0.344813	0.0014465
6.504	2308.4	232.298	9.9618	238.079	0.347589	0.00145997
6.528	2281.56	229.088	9.98292	237.811	0.350767	0.00147498
6.552	2255.19	225.772	10.0042	237.541	0.35407	0.00149057
6.576	2228.54	222.684	10.022	237.315	0.357133	0.00150489
6.6	2204.28	219.228	10.034	237.162	0.360298	0.00151921
6.624	2179.25	216	10.0467	237.001	0.363383	0.00153325
6.648	2153.21	213.368	10.0579	236.859	0.366017	0.00154529
6.672	2126	210.263	10.0662	236.753	0.368976	0.00155848
6.696	2103.11	207.947	10.0714	236.687	0.371208	0.00156835
6.72	2080.71	206.458	10.0777	236.607	0.366456	0.00154879
6.744	2056.61	203.983	10.0807	236.57	0.368771	0.00155883
6.768	2033.1	202.085	10.0802	236.576	0.370516	0.00156616
6.792	2009.47	199.932	10.0807	236.569	0.372542	0.00157477
6.816	1988.29	197.915	10.0784	236.599	0.37436	0.00158226
6.84	1966.85	195.186	10.0782	236.602	0.376907	0.001593
6.864	1947.05	193.017	10.0833	236.536	0.379188	0.00160309
6.888	1925.07	190.915	10.0893	236.461	0.381493	0.00161334
6.912	1904.2	188.576	10.0978	236.353	0.384136	0.00162527
6.936	1881.9	186.593	10.1103	236.194	0.386646	0.00163698
6.96	1864.23	184.377	10.1269	235.983	0.383076	0.00162332
6.984	1842.52	181.803	10.1402	235.815	0.386203	0.00163774
7.008	1822.26	179.574	10.1551	235.625	0.389091	0.00165131
7.032	1800.82	177.344	10.1702	235.433	0.392042	0.00166519
7.056	1780.97	174.803	10.1844	235.254	0.395309	0.00168035
7.08	1762.56	172.311	10.1996	235.061	0.398607	0.00169576
7.104	1744.2	170.623	10.2157	234.857	0.401131	0.00170798
7.128	1724.13	168.18	10.2301	234.674	0.404467	0.00172353
7.152	1707.67	166.607	10.2429	234.511	0.406804	0.00173469
7.176	1688.13	164.639	10.2571	234.332	0.409691	0.00174834
7.2	1671.1	162.984	10.2735	234.124	0.405708	0.00173288
7.224	1653.9	160.762	10.2861	233.964	0.408847	0.00174748
7.248	1636.13	158.952	10.3	233.789	0.411599	0.00176056
7.272	1618.6	157.317	10.314	233.611	0.414184	0.00177296
7.296	1601.52	155.333	10.3301	233.408	0.417287	0.0017878
7.32	1585.6	152.921	10.3485	233.175	0.421033	0.00180565
7.344	1568.7	151.302	10.3657	232.957	0.42381	0.00181926
7.368	1549.76	149.381	10.3821	232.75	0.427013	0.00183464
7.392	1534.97	147.508	10.3975	232.556	0.430121	0.00184954
7.416	1518	145.587	10.4167	232.312	0.433486	0.00186596
7.44	1504.51	143.892	10.4353	232.078	0.429756	0.00185178
7.464	1487.34	142.431	10.4503	231.888	0.432409	0.00186473
7.488	1471.2	140.538	10.4688	231.655	0.435787	0.00188119
7.512	1454.91	139.062	10.4852	231.449	0.438564	0.00189486
7.536	1438.6	137	10.5017	231.241	0.442237	0.00191245
7.56	1422.69	135.308	10.5194	231.018	0.445453	0.00192822
7.584	1407.98	133.662	10.5345	230.828	0.448561	0.00194327
7.608	1392.68	131.738	10.5502	230.631	0.452174	0.0019606
7.632	1377.43	130.508	10.5661	230.431	0.454755	0.0019735
7.656	1362.03	128.646	10.5831	230.217	0.458418	0.00199125
7.68	1349.4	127.045	10.5941	230.079	0.454578	0.00197575
7.704	1334.87	125.672	10.605	229.942	0.457333	0.00198891
7.728	1319.15	124.269	10.6138	229.831	0.460142	0.00200209
7.752	1305.79	122.687	10.6209	229.742	0.463226	0.00201628
7.776	1292.12	121.328	10.6275	229.66	0.465965	0.00202893
7.8	1278.51	120.373	10.6326	229.595	0.467993	0.00203834
7.824	1265.09	118.955	10.6361	229.552	0.470836	0.00205111
7.848	1251.58	117.731	10.6424	229.473	0.473443	0.00206317
7.872	1238.36	116.284	10.6519	229.354	0.476583	0.00207794
7.896	1225.57	115.328	10.6624	229.223	0.478856	0.00208904
7.92	1214.35	114.087	10.6756	229.058	0.474713	0.00207246
7.944	1201.48	112.71	10.6915	228.858	0.477958	0.00208844
7.968	1189.49	111.261	10.7061	228.676	0.481347	0.00210492
7.992	1177.78	109.87	10.7209	228.491	0.484678	0.00212121
8.016	1166.23	108.406	10.7316	228.358	0.488115	0.0021375
8.04	1153.97	106.899	10.7448	228.194	0.491777	0.00215509
8.064	1141.35	105.71	10.7618	227.981	0.49492	0.00217089
8.088	1130.67	104.739	10.7831	227.716	0.49769	0.00218557
8.112	1119.61	103.725	10.8043	227.452	0.500586	0.00220084
8.136	1108.68	102.971	10.8274	227.165	0.502964	0.0022141
8.16	1100.06	102.127	10.8533	226.844	0.498399	0.0021971
8.184	1089.45	100.577	10.8757	226.566	0.502554	0.00221813
8.208	1078.93	99.0423	10.9009	226.254	0.506808	0.00224
8.232	1067.04	97.6761	10.9275	225.924	0.510789	0.00226089
8.256	1056.31	96.2535	10.957	225.561	0.514996	0.00228318
8.28	1046.86	94.8028	10.9888	225.168	0.519357	0.00230653
8.304	1035.55	93.7887	11.0229	224.748	0.522744	0.00232591
8.328	1024.62	92.5211	11.0549	224.356	0.526772	0.00234793
8.352	1014.65	91.507	11.0859	223.977	0.530142	0.00236695
8.376	1004.35	90.338	11.1171	223.594	0.533975	0.00238814
8.4	995.548	89.5479	11.148	223.217	0.529367	0.00237154
8.424	984.726	88.3425	11.1732	222.91	0.533251	0.00239222
8.448	974.479	87.137	11.1955	222.638	0.53715	0.00241266
8.472	964.603	85.863	11.2175	222.371	0.5413	0.00243421
8.496	955.658	84.8082	11.2372	222.133	0.544831	0.00245273
8.52	946.671	83.6712	11.2528	221.943	0.548618	0.00247188
8.544	936.534	82.7397	11.2693	221.744	0.551882	0.00248883
8.568	927.712	82.1918	11.2824	221.585	0.553932	0.00249987
8.592	918.466	81.1644	11.2919	221.47	0.557476	0.00251716
8.616	909.781	80.4795	11.2985	221.391	0.55994	0.00252919
8.64	901.96	79.8933	11.3005	221.366	0.554498	0.00250489
8.664	892.467	78.9867	11.3032	221.334	0.557682	0.00251964
8.688	882.533	78.16	11.3049	221.313	0.560657	0.00253332
8.712	873.507	77.3867	11.31	221.252	0.563515	0.00254694
8.736	864.733	76.48	11.3145	221.197	0.566855	0.00256267
8.76	856.293	75.84	11.3175	221.162	0.569307	0.00257416
8.784	847.733	74.7333	11.322	221.107	0.573447	0.00259352
8.808	839.293	74.0267	11.3294	221.018	0.576269	0.00260734
8.832	832	73.3467	11.3387	220.906	0.579021	0.00262113
8.856	823.8	72.48	11.3504	220.765	0.582548	0.00263877
8.88	816.545	72.026	11.3612	220.635	0.57691	0.00261477
8.904	809.052	71.3506	11.3744	220.476	0.579759	0.00262958
8.928	802.247	70.4935	11.3846	220.354	0.583286	0.00264703
8.952	794.039	69.6883	11.3955	220.224	0.58672	0.0026642
8.976	786.364	68.8831	11.4027	220.137	0.590161	0.00268088
9	779.455	68.2208	11.4097	220.052	0.593064	0.00269511
9.024	772.169	67.5195	11.4192	219.939	0.5962	0.00271075
9.048	765.558	66.8312	11.426	219.858	0.599283	0.00272578
9.072	757.234	66.0909	11.4301	219.809	0.602661	0.00274175
9.096	750.208	65.6753	11.4363	219.735	0.604692	0.00275192
9.12	744.557	65.0633	11.4432	219.651	0.599806	0.00273072
9.144	738.152	64.519	11.4516	219.552	0.602407	0.0027438
9.168	729.342	63.8987	11.4574	219.482	0.605429	0.00275844
9.192	721.975	63.1899	11.4623	219.424	0.608831	0.00277467
9.216	714.987	62.3797	11.4668	219.37	0.612731	0.00279314
9.24	708.038	61.6076	11.4743	219.28	0.616553	0.00281171
9.264	700.367	60.8101	11.4801	219.212	0.620576	0.00283094
9.288	694.38	60.3797	11.4864	219.136	0.62287	0.00284239
9.312	687.456	59.7342	11.4941	219.045	0.626268	0.00285909
9.336	681.43	59.2152	11.4987	218.99	0.629044	0.00287247
9.36	675.975	58.7531	11.5014	218.958	0.623693	0.00284845
9.384	670.111	58.2346	11.5038	218.93	0.626478	0.00286154
9.408	664.63	57.7407	11.5047	218.919	0.62915	0.00287389
9.432	658.951	57.3086	11.5089	218.869	0.631576	0.00288564
9.456	652.84	56.8889	11.5164	218.779	0.634007	0.00289793
9.48	646.79	56.284	11.5248	218.679	0.637431	0.00291491
9.504	641.506	55.6914	11.5356	218.552	0.640828	0.00293215
9.528	635.136	55.0988	11.5508	218.371	0.64435	0.00295071
9.552	628.951	54.4691	11.5658	218.193	0.648116	0.00297038
9.576	623.358	53.7778	11.5837	217.981	0.65228	0.00299236
9.6	618.169	53.2892	11.6071	217.705	0.647433	0.0029739
9.624	612.675	52.7108	11.632	217.411	0.651053	0.00299457
9.648	607.518	52.0361	11.6542	217.15	0.655249	0.00301749
9.672	601.639	51.5301	11.6792	216.857	0.658563	0.00303686
9.696	595.747	50.9398	11.7037	216.569	0.662415	0.00305868
9.72	590.88	50.3614	11.7245	216.325	0.666192	0.00307958
9.744	585.47	49.759	11.7442	216.096	0.670194	0.00310137
9.768	580.181	49.3253	11.7599	215.913	0.673182	0.00311784
9.792	574.904	48.7108	11.7736	215.752	0.677355	0.0031395
9.816	569.205	48.1687	11.789	215.573	0.681153	0.00315973
9.84	564.859	47.7882	11.7996	215.45	0.675776	0.00313658
9.864	559.4	47.3412	11.8124	215.301	0.678986	0.00315366
9.888	554.271	46.9882	11.8216	215.194	0.681588	0.00316732
9.912	549.706	46.4824	11.8357	215.031	0.685233	0.00318667
9.936	543.894	45.9176	11.8447	214.926	0.689397	0.0032076
9.96	538.329	45.5765	11.8526	214.835	0.692054	0.00322132
9.984	532.918	44.8824	11.8554	214.802	0.697243	0.00324598
10.008	526.929	44.4	11.8588	214.763	0.701035	0.00326422
10.032	522.106	43.8118	11.8636	214.708	0.705614	0.00328638
10.056	517.659	43.4941	11.8675	214.663	0.708222	0.00329924
10.08	513.345	43.1264	11.8691	214.644	0.703009	0.00327523
10.104	509.333	42.977	11.8743	214.584	0.704351	0.00328239
10.128	504.379	42.5517	11.8752	214.574	0.707857	0.0032989
10.152	499.943	42.1954	11.876	214.564	0.710851	0.003313
10.176	495.529	41.7471	11.8739	214.589	0.714607	0.00333012
10.2	490.862	41.3793	11.8763	214.561	0.717793	0.0033454
10.224	486.195	40.9655	11.8774	214.549	0.721396	0.00336239
10.248	481.368	40.5057	11.8844	214.468	0.725441	0.00338252
10.272	476.989	40.1609	11.8889	214.416	0.728565	0.0033979
10.296	472.437	39.7241	11.8964	214.33	0.732519	0.00341772
10.32	468.427	39.2697	11.904	214.242	0.728333	0.00339958
10.344	464.427	38.9775	11.913	214.137	0.731083	0.00341408
10.368	460.258	38.5843	11.9246	214.004	0.734757	0.00343338
10.392	455.764	38.2921	11.9396	213.832	0.737601	0.00344944
10.416	451.225	37.8202	11.9537	213.67	0.7421	0.00347312
10.44	446.584	37.3596	11.9659	213.53	0.746585	0.00349639
10.464	442.461	36.9888	11.9755	213.42	0.750279	0.00351551
10.488	438.18	36.5281	11.9898	213.257	0.754883	0.00353978
10.512	433.888	36.0112	12.005	213.083	0.760115	0.00356722
10.536	430.067	35.7416	12.0215	212.895	0.762969	0.00358379
10.56	426.747	35.4835	12.0386	212.699	0.757238	0.00356014
10.584	422.659	35.1209	12.0518	212.549	0.761074	0.00358069
10.608	418.67	34.6813	12.0647	212.402	0.765742	0.00360515
10.632	414.846	34.2967	12.0795	212.234	0.769907	0.00362762
10.656	411.385	34.044	12.0918	212.095	0.772736	0.00364335
10.68	407.934	33.6593	12.1056	211.939	0.776988	0.0036661
10.704	403.769	33.3736	12.1226	211.746	0.780276	0.00368496
10.728	399.978	33.044	12.1438	211.507	0.784032	0.00370689
10.752	395.604	32.5385	12.1679	211.235	0.789828	0.00373909
10.776	392.022	32.1758	12.194	210.941	0.79404	0.00376427
10.8	388.86	31.914	12.229	210.549	0.788432	0.00374465
10.824	385.71	31.5806	12.2594	210.209	0.792286	0.00376905
10.848	382.011	31.1398	12.2904	209.863	0.797494	0.00380007
10.872	378.731	30.6989	12.3161	209.577	0.80281	0.00383063
10.896	375.097	30.2903	12.3349	209.368	0.807924	0.00385886
10.92	372.043	29.8387	12.3493	209.209	0.813673	0.00388929
10.944	368.409	29.5806	12.3656	209.028	0.817091	0.003909
10.968	364.624	29.3118	12.3778	208.894	0.820745	0.00392901
10.992	360.968	29.1398	12.3817	208.851	0.823254	0.00394182
11.016	357.505	28.914	12.3833	208.833	0.826503	0.00395772
11.04	354.674	28.7368	12.3825	208.841	0.820336	0.00392803
11.064	351.147	28.4	12.3705	208.974	0.825252	0.00394906
11.088	347.937	28.1789	12.3612	209.077	0.828618	0.00396322
11.112	344.547	27.9895	12.3542	209.155	0.831582	0.00397591
11.136	341.779	27.6632	12.3516	209.183	0.836383	0.00399833
11.16	338.421	27.3474	12.3519	209.18	0.841144	0.00402115
11.184	334.768	27.1368	12.3554	209.142	0.844465	0.00403776
11.208	331.821	26.8632	12.3553	209.143	0.848716	0.00405807
11.232	328.695	26.5895	12.3524	209.174	0.853076	0.0040783
11.256	325.768	26.3579	12.3396	209.317	0.85695	0.00409403
11.28	323.34	26.1443	12.3221	209.511	0.851673	0.00406505
11.304	320.732	25.9072	12.3033	209.72	0.855704	0.00408022
11.328	317.495	25.6804	12.2864	209.908	0.859669	0.00409546
11.352	314.763	25.5567	12.2728	210.059	0.861989	0.00410355
11.376	311.99	25.6392	12.2549	210.259	0.861144	0.00409563
11.4	309.072	25.4124	12.237	210.459	0.86514	0.00411072
11.424	306.588	25.1959	12.2251	210.592	0.868927	0.0041261
11.448	303.515	24.9794	12.2087	210.777	0.872856	0.00414114
11.472	300.67	24.6392	12.1939	210.942	0.878827	0.00416619
11.496	297.722	24.4742	12.1866	211.024	0.88194	0.00417933
11.52	295.465	24.2929	12.1916	210.968	0.876208	0.00415327
11.544	292.323	23.8889	12.1902	210.984	0.883393	0.00418702
11.568	289.333	23.7172	12.1846	211.048	0.886729	0.00420156
11.592	286.414	23.4747	12.1803	211.095	0.891321	0.00422236
11.616	283.657	23.1818	12.1712	211.198	0.8969	0.00424673
11.64	281.263	23.0101	12.1673	211.242	0.900302	0.00426195
11.664	278.889	22.9596	12.1647	211.271	0.901524	0.00426714
11.688	276.475	22.8384	12.1518	211.417	0.904116	0.00427646
11.712	274.111	22.6465	12.1377	211.575	0.908033	0.00429178
11.736	271.758	22.4545	12.1204	211.771	0.912013	0.00430661
11.76	269.683	22.2475	12.1004	211.997	0.907186	0.00427924
11.784	267.307	22.0297	12.0808	212.22	0.911727	0.00429615
11.808	264.762	21.8911	12.066	212.387	0.914793	0.00430719
11.832	262.366	21.7822	12.0492	212.579	0.917296	0.00431508
11.856	259.475	21.604	12.0317	212.779	0.921243	0.00432959
11.88	257.099	21.396	12.0099	213.027	0.92577	0.00434579
11.904	255.01	21.2376	11.9796	213.373	0.929332	0.00435544
11.928	252.505	21.0693	11.9458	213.761	0.93318	0.00436554
11.952	249.97	20.9703	11.9138	214.128	0.935617	0.00436942
11.976	247.426	20.7723	11.8877	214.43	0.940109	0.00438422
12	245.32	20.6796	11.8635	214.709	0.933166	0.0043462
12.024	242.883	20.6019	11.8434	214.942	0.935137	0.00435065
12.048	240.835	20.4757	11.8216	215.195	0.938073	0.00435919
12.072	238.728	20.3301	11.7971	215.479	0.941442	0.00436907
12.096	236.398	20.1068	11.7829	215.644	0.946575	0.00438952
12.12	234.447	19.9612	11.7694	215.802	0.950021	0.00440229
12.144	232.34	19.699	11.7617	215.892	0.95614	0.0044288
12.168	230.214	19.5631	11.7623	215.884	0.959543	0.00444471
12.192	228.165	19.4757	11.7596	215.915	0.961853	0.00445476
12.216	226.369	19.2427	11.7602	215.908	0.967504	0.00448109
12.24	224.943	19.1238	11.7588	215.925	0.961219	0.00445164
12.264	223	18.9333	11.7564	215.953	0.965984	0.00447311
12.288	221.095	18.7429	11.7512	216.013	0.970803	0.00449418
12.312	219.343	18.6952	11.7492	216.037	0.972237	0.00450033
12.336	217.086	18.4762	11.7537	215.985	0.977945	0.00452784
12.36	215.371	18.3429	11.7483	216.047	0.981499	0.00454299
12.384	213.495	18.219	11.7387	216.16	0.984867	0.00455619
12.408	211.171	17.9905	11.7316	216.243	0.991009	0.00458285
12.432	209.514	17.8381	11.7183	216.399	0.995148	0.00459868
12.456	207.505	17.6381	11.7119	216.473	1.00068	0.00462265
12.48	205.991	17.5981	11.704	216.566	0.992564	0.0045832
12.504	203.925	17.4953	11.6953	216.667	0.995596	0.00459505
12.528	202.514	17.3084	11.6851	216.787	1.00075	0.00461628
12.552	200.766	17.2336	11.6715	216.946	1.00301	0.0046233
12.576	199.355	17.0935	11.6597	217.086	1.00699	0.00463868
12.6	197.607	16.9439	11.6458	217.249	1.01133	0.00465515
12.624	195.701	16.8037	11.638	217.341	1.01554	0.00467254
12.648	194.15	16.729	11.6355	217.37	1.01793	0.00468292
12.672	192.57	16.6168	11.6226	217.522	1.02131	0.00469522
12.696	190.832	16.4299	11.6118	217.649	1.02693	0.00471826
12.72	189.404	16.3119	11.6014	217.773	1.02106	0.00468864
12.744	187.936	16.1743	11.5868	217.945	1.02523	0.00470409
12.768	186.385	16.0275	11.577	218.061	1.02979	0.00472248
12.792	184.725	15.9817	11.5715	218.125	1.03146	0.00472876
12.816	183.33	15.8991	11.5635	218.22	1.03416	0.00473905
12.84	181.798	15.7431	11.5515	218.363	1.03908	0.00475848
12.864	180.339	15.6789	11.5442	218.449	1.04129	0.00476674
12.888	179	15.5138	11.539	218.512	1.04663	0.00478981
12.912	177.532	15.3761	11.533	218.583	1.05121	0.00480919
12.936	176.101	15.3119	11.5306	218.611	1.05355	0.00481927
12.96	174.919	15.2342	11.5312	218.603	1.04675	0.00478834
12.984	173.288	15.027	11.5325	218.588	1.05377	0.00482081
13.008	171.964	14.8739	11.5301	218.616	1.05905	0.00484431
13.032	170.532	14.7477	11.5268	218.656	1.06352	0.00486389
13.056	169.036	14.6577	11.5182	218.758	1.06679	0.0048766
13.08	167.667	14.5315	11.5091	218.866	1.07128	0.00489468
13.104	166.243	14.3784	11.5	218.975	1.07676	0.00491729
13.128	165	14.3784	11.4812	219.199	1.07683	0.00491258
13.152	163.613	14.2252	11.4606	219.444	1.08222	0.00493166
13.176	162.387	14.1802	11.4447	219.635	1.08389	0.00493498
13.2	161.124	14.1327	11.4281	219.833	1.076	0.00489461
13.224	159.743	14.0354	11.4079	220.075	1.07947	0.00490499
13.248	158.142	13.9646	11.383	220.374	1.08199	0.0049098
13.272	156.991	13.8496	11.3626	220.618	1.08606	0.0049228
13.296	155.903	13.6903	11.3407	220.881	1.09174	0.00494263
13.32	154.779	13.6372	11.3279	221.036	1.09375	0.00494828
13.344	153.416	13.5575	11.3167	221.171	1.09686	0.00495933
13.368	152.239	13.4867	11.3156	221.185	1.09982	0.00497241
13.392	150.85	13.4071	11.3177	221.159	1.10327	0.00498859
13.416	149.584	13.2832	11.3158	221.182	1.10833	0.00501094
13.44	148.409	13.1217	11.3101	221.25	1.10507	0.00499466
13.464	147.2	13.0522	11.3102	221.249	1.10814	0.00500857
13.488	146.513	12.887	11.315	221.191	1.11496	0.00504072
13.512	145.348	12.8087	11.3158	221.182	1.11846	0.00505676
13.536	144.043	12.7304	11.3138	221.206	1.12199	0.00507214
13.56	142.896	12.6174	11.3084	221.271	1.12684	0.00509258
13.584	141.835	12.4957	11.3004	221.367	1.13204	0.00511385
13.608	140.583	12.3652	11.2951	221.432	1.1378	0.00513838
13.632	139.583	12.3565	11.2817	221.594	1.13819	0.00513637
13.656	138.565	12.3391	11.2717	221.715	1.13903	0.00513735
13.68	137.863	12.3077	11.2684	221.754	1.13073	0.00509904
13.704	136.88	12.1966	11.2636	221.813	1.13567	0.00511994
13.728	135.684	12.094	11.2569	221.894	1.14033	0.00513905
13.752	134.658	12	11.253	221.941	1.14468	0.00515758
13.776	133.598	11.8889	11.2503	221.973	1.14988	0.00518027
13.8	132.846	11.7778	11.2556	221.909	1.15525	0.00520595
13.824	131.701	11.6838	11.2673	221.768	1.16021	0.00523162
13.848	130.598	11.5812	11.2834	221.573	1.1657	0.00526102
13.872	129.53	11.4359	11.3062	221.297	1.17341	0.0053024
13.896	128.462	11.4017	11.3279	221.036	1.1759	0.00531994
13.92	127.58	11.3025	11.3519	220.747	1.1715	0.00530698
13.944	126.437	11.1597	11.3716	220.51	1.1792	0.00534761
13.968	125.496	11.0084	11.3923	220.262	1.18738	0.00539077
13.992	124.538	10.8571	11.4122	220.023	1.1957	0.00543442
14.016	123.647	10.7899	11.4282	219.832	1.19975	0.00545758
14.04	122.84	10.6807	11.4504	219.566	1.20608	0.005493
14.064	121.924	10.605	11.4719	219.309	1.21074	0.00552071
14.088	120.983	10.521	11.4914	219.077	1.21586	0.00554991
14.112	120.076	10.4454	11.5031	218.938	1.22044	0.00557438
14.136	119.084	10.3529	11.508	218.88	1.22592	0.00560088
14.16	118.157	10.2645	11.5056	218.909	1.2209	0.00557722
14.184	117.248	10.1736	11.5031	218.938	1.22625	0.0056009
14.208	116.298	10.0744	11.5032	218.937	1.23219	0.00562808
14.232	115.289	10	11.5045	218.921	1.23685	0.00564976
14.256	114.289	9.91736	11.5107	218.847	1.2421	0.00567566
14.28	113.289	9.90909	11.5205	218.731	1.24316	0.0056835
14.304	112.273	9.78512	11.5229	218.702	1.25086	0.00571948
14.328	111.372	9.68595	11.5244	218.684	1.25716	0.00574877
14.352	110.57	9.60331	11.5232	218.699	1.26248	0.00577266
14.376	109.711	9.4876	11.531	218.606	1.27004	0.00580972
14.4	109.114	9.39837	11.5318	218.596	1.26545	0.00578899
14.424	108.252	9.38211	11.54	218.5	1.26697	0.0057985
14.448	107.439	9.30894	11.5357	218.55	1.27187	0.00581957
14.472	106.675	9.25203	11.5301	218.617	1.27575	0.00583554
14.496	105.951	9.12195	11.5216	218.718	1.28431	0.005872
14.52	105.114	9.11382	11.5136	218.813	1.28513	0.00587317
14.544	104.358	9.05691	11.4933	219.054	1.2889	0.00588391
14.568	103.309	9.04065	11.4772	219.246	1.29022	0.00588483
14.592	102.65	8.97561	11.4603	219.448	1.29456	0.00589914
14.616	101.943	8.92683	11.4501	219.569	1.29798	0.0059115
14.64	101.352	8.832	11.4291	219.821	1.29381	0.00588575
14.664	100.568	8.832	11.4117	220.029	1.29388	0.00588048
14.688	99.8	8.784	11.3952	220.227	1.29719	0.00589025
14.712	99.104	8.728	11.3896	220.294	1.30126	0.00590692
14.736	98.472	8.624	11.381	220.398	1.3086	0.00593746
14.76	97.624	8.576	11.3755	220.464	1.3123	0.00595247
14.784	96.816	8.536	11.3583	220.67	1.31518	0.00595994
14.808	95.992	8.464	11.3412	220.876	1.32037	0.00597787
14.832	95.288	8.384	11.33	221.01	1.32627	0.00600094
14.856	94.544	8.336	11.3189	221.145	1.32992	0.00601378
14.88	93.8268	8.25984	11.2961	221.419	1.3248	0.00598324
14.904	93.1339	8.25197	11.2784	221.633	1.32531	0.00597975
14.928	92.3228	8.24409	11.2643	221.804	1.32597	0.00597814
14.952	91.7717	8.16535	11.2507	221.968	1.33177	0.00599981
14.976	91.1811	8.11811	11.2383	222.118	1.33531	0.0060117
15	90.315	8.08661	11.2294	222.227	1.33795	0.00602064
15.024	89.685	8.01575	11.2144	222.409	1.34329	0.00603971
15.048	89.0551	7.96063	11.2079	222.487	1.34774	0.00605758
15.072	88.2992	7.88976	11.211	222.451	1.35385	0.00608605
15.096	87.5354	7.79528	11.2124	222.433	1.36189	0.00612269
	87.0698	7.74419	11.2201
	86.2558	7.70543	11.2316
	85.5504	7.62791	11.2423
	84.8915	7.55814	11.2623
	84.3721	7.49612	11.2776
	83.7752	7.4031	11.2933
	83.2636	7.37209	11.3069
	82.5659	7.30233	11.3292
	81.969	7.18605	11.3499
	81.3721	7.16279	11.373
	80.855	7.0916	11.3994
	80.0992	7.03053	11.418
	79.374	6.93893	11.4391
	78.7939	6.8855	11.4569
	78.2137	6.80916	11.4638
	77.7328	6.73282	11.4752
	77.1298	6.69466	11.4788
	76.5496	6.64122	11.4825
	76.0382	6.61069	11.479
	75.5573	6.58015	11.4796
	75.218	6.54887	11.4739
	74.7594	6.53383	11.4625
	74.0977	6.4812	11.4565
	73.5489	6.45113	11.4431
	73.0902	6.38346	11.4326
	72.5789	6.35338	11.4243
	72.0451	6.30827	11.4148
	71.6541	6.25564	11.4077
	71.0977	6.24812	11.4075
	70.5489	6.19549	11.4102
	70.037	6.14815	11.411
	69.4667	6.1037	11.4129
	68.9407	6.06667	11.4196
	68.4963	5.99259	11.4206
	68.0741	5.95556	11.4194
	67.6519	5.9037	11.4156
	67.1407	5.86667	11.4194
	66.7556	5.80741	11.4212
	66.1556	5.77037	11.4194
	65.5852	5.77037	11.4168
	65.0073	5.72993	11.4144
	64.5109	5.64234	11.4062
	63.9124	5.60584	11.4009
	63.4307	5.59124	11.3908
	63	5.52555	11.3805
	62.5912	5.48905	11.3756
	62.1606	5.46715	11.3677
	61.8321	5.43066	11.3485
	61.3212	5.38686	11.3378
	60.8175	5.35766	11.3247
	60.5468	5.35252	11.3065
	60.0216	5.33094	11.2874
	59.5827	5.30935	11.2688
	59.1727	5.2446	11.2557
	58.9065	5.25899	11.2381
	58.5036	5.22302	11.227
	58.3022	5.20863	11.2189
	57.9928	5.19424	11.2256
	57.5036	5.11511	11.2366
	56.9137	5.08633	11.2378
	56.5461	5.03546	11.2467
	56.1915	5.00709	11.2681
	55.7801	4.92199	11.295
	55.5106	4.89362	11.319
	55.1986	4.88652	11.3461
	54.9716	4.86525	11.3771
	54.6667	4.78014	11.4042
	54.1064	4.70922	11.4348
	53.6596	4.69504	11.4575
	53.1986	4.60993	11.4825
	52.8951	4.58741	11.5067
	52.4755	4.55245	11.527
	52.1399	4.51049	11.5304
	51.7552	4.46853	11.5213
	51.3497	4.41958	11.5269
	50.9371	4.40559	11.5256
	50.6014	4.39161	11.5251
	50.3077	4.38462	11.5248
	49.9371	4.38462	11.5199
	49.5804	4.31469	11.5095
