# Supplementary material for: Tropospheric temperature measurements with the pure rotational Raman lidar technique using nonlinear calibration functions
Source: Copernicus journal article supplement (doi:10.5194/amt-10-315-2017), 2017-01-27
Supplement: Supplementary file 37 [file 02.10.2014. Temperature profile retrieved using Eq. (11).xlsx]

## Sheet: Лист1
z, km
Altitude	Smoothed signals	Smoothed signals	Smoothed ratio
0.048	573	65.5	8.59143	248.597	4.32126	0.0173826	A0	0.075	282.75	0.143	286.15	0.83	277.15
0.072	743	82	8.45197	251.167	3.21321	0.0127931	0.550998	0.182	283.75	0.188	285.55	1.51	274.35
0.096	995.333	113	8.38058	252.52	2.77071	0.0109723		0.199	283.55	0.484	282.75	3.05	266.15	3.048	6.14059
0.12	1177.67	135	8.307	253.942	2.56482	0.0101	B0	0.24	283.25	0.737	280.25	5.61	250.65	5.616	3.44884
0.144	1215.67	150.333	8.2572	254.92	2.45917	0.00964683	397.698	0.647	280.35	0.835	279.35	7.21	238.15	7.2	4.42799
0.168	1204.67	148.333	8.21704	255.719	2.49065	0.00973979		0.821	277.75	1.517	273.55	9.14	224.15	9.144	0.333978
0.192	1167.67	153.333	8.11769	257.735	2.49754	0.00969031		1.186	273.95	1.555	273.25	12	210.65	12	1.96366
0.216	1124.33	142.667	8.00646	260.061	2.63099	0.0101168		1.341	274.55	2.11	268.65
0.24	1085.2	140.6	7.94315	261.418	2.07681	0.00794443		1.5	275.35	2.702	268.65
0.264	1046.4	134	7.84723	263.522	2.1603	0.00819777		1.548	275.15	3.053	266.65
0.288	1008.2	129	7.81317	264.284	2.21441	0.00837889		1.605	274.75	3.943	262.05
0.312	976.8	127.6	7.78997	264.807	2.238	0.00845143		2.242	269.65	4.143	262.05
0.336	954.6	121.8	7.79515	264.69	2.28556	0.00863487		2.449	270.05	4.257	262.05
0.36	928	114.4	7.78307	264.964	2.35867	0.00890188		2.661	268.55	5.195	255.85
0.384	901.8	117.6	7.76429	265.391	2.34126	0.00882195		2.879	267.05	5.59	253.25
0.408	888.4	115.2	7.73749	266.005	2.37571	0.00893109		3.046	265.85	5.62	252.65
0.432	870	110.6	7.70801	266.686	2.4343	0.00912796		3.192	264.45	6.572	244.15
0.456	842.4	109.8	7.69118	267.077	2.45381	0.00918767		3.397	264.45	7.03	240.05
0.48	834.571	107.714	7.66519	267.685	2.1022	0.00785324		3.502	263.55	7.22	239.65
0.504	819.857	109.143	7.60088	269.212	2.11608	0.00786027		3.763	261.45	8.3	232.65
0.528	801.857	106.714	7.59068	269.457	2.14388	0.00795629		3.983	262.45	8.402	232.05
0.552	793	105.857	7.59838	269.272	2.14997	0.00798438		4.168	261.15	9.18	225.45
0.576	785.429	105.143	7.5932	269.397	2.15962	0.00801649		5.002	255.25	10.36	215.85
0.6	784.286	103.857	7.61335	268.914	2.16378	0.00804638		5.497	251.45	10.827	211.45
0.624	774.286	104.571	7.61857	268.789	2.15688	0.00802445		5.6	250.65	11.324	210.05
0.648	768.571	101.714	7.63633	268.367	2.17749	0.00811387		5.718	249.65	11.382	209.85
0.672	771.857	99	7.64876	268.073	2.19834	0.00820052		5.763	249.25	11.74	210.45
0.696	777.571	99.5714	7.66158	267.77	2.18687	0.00816698		5.99	248.05	12.161	211.55
0.72	768.333	97.3333	7.6564	267.892	1.95128	0.00728382		6.036	247.65	13.54	215.25
0.744	771	98.7778	7.63705	268.35	1.94482	0.00724732		6.903	240.35	13.753	216.05
0.768	775	100.556	7.63752	268.339	1.92878	0.00718787		7.2	237.85	15.715	214.55
0.792	781.222	102.111	7.62574	268.618	1.91884	0.00714337		8.398	227.85	16.08	214.25
0.816	798	104.556	7.60098	269.21	1.9049	0.0070759		9.12	222.85
0.84	819.556	110.556	7.59542	269.343	1.8575	0.00689641		10.149	215.05
0.864	852.111	116.111	7.58929	269.49	1.81559	0.00673713		10.3	214.45
0.888	892.444	120.444	7.60136	269.201	1.77778	0.00660392		11.123	209.25
0.912	955.556	128.667	7.6145	268.886	1.71579	0.0063811		11.179	209.05
0.936	1040	138.222	7.64123	268.251	1.64634	0.00613731		11.589	209.35
0.96	1185.45	153	7.67286	267.505	1.40518	0.00525291		11.68	209.45
0.984	1307.73	167.091	7.72722	266.241	1.33119	0.00499992		11.899	209.05
1.008	1458.45	183.727	7.80198	264.536	1.25228	0.00473386		12.061	210.15
1.032	1631.73	207.818	7.87218	262.969	1.16427	0.0044274		12.469	212.75
1.056	1817.18	228.727	7.94085	261.468	1.09641	0.00419331		12.576	213.45
1.08	2019.73	253.091	7.99554	260.293	1.03271	0.00396747		13.47	214.25
1.104	2254	281.364	8.02276	259.715	0.974896	0.00375371		14.322	217.05
1.128	2522.55	309.091	8.04175	259.315	0.926328	0.00357221		15.201	216.75
1.152	2812.27	343.727	8.04945	259.153	0.877202	0.00338488		16.03	216.45
1.176	3118.09	381.091	8.06217	258.887	0.831378	0.00321136
1.2	3465.31	426.462	8.06852	258.754	0.722464	0.00279209
1.224	3794.08	471.462	8.06644	258.798	0.687717	0.00265736
1.248	4127.69	513.692	8.06082	258.915	0.659496	0.00254715
1.272	4477.38	558.077	8.03633	259.429	0.635295	0.00244882
1.296	4813.38	602.308	8.00463	260.1	0.614823	0.0023638
1.32	5162.62	644.154	7.97032	260.832	0.597777	0.0022918
1.344	5532.23	695.231	7.93733	261.544	0.578773	0.00221291
1.368	5917.23	744.385	7.90261	262.3	0.562609	0.00214491
1.392	6292.23	797.308	7.8627	263.179	0.547487	0.00208029
1.416	6655.62	849.692	7.81939	264.144	0.534467	0.00202339
1.44	6988.73	895.467	7.77674	265.107	0.488319	0.00184197
1.464	7337.4	945.2	7.72794	266.225	0.479459	0.00180096
1.488	7669.73	1000.53	7.67931	267.354	0.470316	0.00175915
1.512	8015.13	1055.13	7.62836	268.556	0.462355	0.00172163
1.536	8346.33	1106	7.57969	269.722	0.455702	0.00168953
1.56	8686.87	1154.8	7.5365	270.771	0.44953	0.00166018
1.584	9007.73	1204.6	7.49374	271.824	0.443725	0.0016324
1.608	9319.67	1255.6	7.45458	272.801	0.437942	0.00160535
1.632	9642.33	1305	7.42306	273.596	0.432198	0.00157969
1.656	9957.27	1353.53	7.39608	274.283	0.426625	0.00155542
1.68	10249.9	1393.06	7.3723	274.894	0.396774	0.00144337
1.704	10534.1	1436.29	7.34898	275.497	0.39255	0.00142488
1.728	10808.7	1474.18	7.32743	276.059	0.389061	0.00140934
1.752	11076.6	1513.41	7.31191	276.466	0.385159	0.00139315
1.776	11340.5	1553.59	7.29939	276.796	0.381115	0.00137688
1.8	11591.8	1591.24	7.28651	277.136	0.377553	0.00136234
1.824	11843.9	1630.06	7.27253	277.508	0.374089	0.00134803
1.848	12066.1	1666.41	7.26044	277.83	0.370924	0.00133507
1.872	12279.4	1693.29	7.24654	278.203	0.368921	0.00132609
1.896	12463.6	1718.88	7.23295	278.568	0.367131	0.00131792
1.92	12597.4	1746.05	7.22249	278.851	0.345363	0.00123852
1.944	12763.7	1771.74	7.21348	279.096	0.343483	0.0012307
1.968	12898.6	1791.16	7.20491	279.328	0.342194	0.00122506
1.992	13030.4	1815.05	7.19718	279.539	0.340511	0.00121812
2.016	13146.2	1833.63	7.18733	279.809	0.339463	0.0012132
2.04	13264.1	1846.21	7.17884	280.041	0.338825	0.00120991
2.064	13352.4	1858.21	7.17255	280.214	0.338143	0.00120673
2.088	13425.9	1872.05	7.16648	280.382	0.337333	0.00120312
2.112	13469.7	1882.37	7.15994	280.562	0.336887	0.00120076
2.136	13524.2	1893.26	7.15648	280.658	0.336181	0.00119783
2.16	13515.3	1888.24	7.1538	280.732	0.320327	0.00114104
2.184	13544.4	1895.48	7.15064	280.82	0.319947	0.00113933
2.208	13546.8	1898.05	7.14904	280.864	0.319855	0.00113882
2.232	13537.6	1898.86	7.14829	280.885	0.319856	0.00113874
2.256	13535	1895.38	7.15136	280.8	0.319923	0.00113933
2.28	13516.4	1893.05	7.15745	280.631	0.319738	0.00113935
2.304	13486.1	1886.24	7.16354	280.463	0.319904	0.00114063
2.328	13454.2	1877	7.17178	280.236	0.320121	0.00114233
2.352	13417	1872.95	7.1809	279.985	0.319906	0.00114258
2.376	13357.1	1857.86	7.19185	279.685	0.320444	0.00114573
2.4	13271.4	1840.61	7.20453	279.339	0.306811	0.00109835
2.424	13195.2	1826.43	7.21535	279.045	0.307314	0.00110131
2.448	13115.4	1812.43	7.22483	278.788	0.3079	0.00110443
2.472	13040.4	1801.78	7.2336	278.551	0.308281	0.00110673
2.496	12946.2	1785.74	7.24314	278.294	0.309061	0.00111055
2.52	12865	1767.04	7.25056	278.095	0.310167	0.00111533
2.544	12755.1	1757.13	7.25733	277.913	0.310691	0.00111794
2.568	12648.6	1743.65	7.26287	277.765	0.31157	0.0011217
2.592	12533.1	1725.26	7.26809	277.626	0.312885	0.001127
2.616	12423.7	1709.26	7.27497	277.443	0.313921	0.00113148
2.64	12276	1688.32	7.2824	277.245	0.302526	0.00109119
2.664	12140.9	1666.6	7.28902	277.07	0.304071	0.00109745
2.688	12015.2	1649.2	7.29726	276.852	0.305188	0.00110235
2.712	11874.9	1628.08	7.3064	276.611	0.306606	0.00110844
2.736	11733.8	1604.48	7.31615	276.355	0.308231	0.00111535
2.76	11600.5	1582.28	7.32757	276.055	0.309668	0.00112176
2.784	11458	1558.2	7.33837	275.773	0.311359	0.00112904
2.808	11312.2	1539.12	7.3513	275.437	0.312528	0.00113466
2.832	11159	1517.28	7.36373	275.115	0.314022	0.00114142
2.856	11014.4	1494.16	7.37587	274.802	0.315678	0.00114875
2.88	10872.8	1470.48	7.3875	274.503	0.305477	0.00111283
2.904	10724.4	1451.22	7.39907	274.207	0.306844	0.00111902
2.928	10578.1	1424.26	7.40919	273.949	0.30906	0.00112817
2.952	10440.3	1406.63	7.42082	273.653	0.310332	0.00113403
2.976	10296.6	1386.3	7.43357	273.33	0.311849	0.00114092
3	10153	1364.44	7.44676	272.998	0.313538	0.0011485
3.024	10016.4	1342.93	7.45958	272.676	0.315251	0.00115614
3.048	9875.26	1322.93	7.47499	272.291	0.316713	0.00116314
3.072	9736.26	1302.04	7.48991	271.919	0.31834	0.00117072
3.096	9599.19	1280.78	7.50701	271.496	0.31993	0.0011784
3.12	9481.24	1261.34	7.52657	271.015	0.309914	0.00114353
3.144	9340.55	1239.62	7.54798	270.491	0.311367	0.00115112
3.168	9204.55	1217.62	7.56911	269.978	0.312917	0.00115905
3.192	9076.72	1195.69	7.59172	269.432	0.314421	0.00116698
3.216	8948.07	1175.79	7.61521	268.869	0.315702	0.00117418
3.24	8828.24	1155.14	7.63886	268.307	0.317102	0.00118186
3.264	8710.79	1134.72	7.66236	267.752	0.318539	0.00118968
3.288	8587.03	1116.48	7.68479	267.226	0.319835	0.00119687
3.312	8472.28	1098.38	7.70588	266.735	0.321222	0.00120427
3.336	8351.72	1079.59	7.72287	266.342	0.322997	0.00121272
3.36	8244.1	1063.06	7.73931	265.963	0.313883	0.00118018
3.384	8131.87	1045.87	7.75387	265.629	0.315612	0.00118817
3.408	8021	1030.74	7.76579	265.357	0.317254	0.00119557
3.432	7913.13	1015.61	7.77521	265.142	0.319068	0.00120339
3.456	7807.42	1003.77	7.78347	264.955	0.320522	0.00120972
3.48	7694.32	987.581	7.79114	264.781	0.322685	0.00121869
3.504	7588.29	972.516	7.79805	264.625	0.324763	0.00122726
3.528	7481.48	958.226	7.80264	264.521	0.326909	0.00123585
3.552	7372.9	945.871	7.80927	264.372	0.328696	0.00124331
3.576	7267.29	931.194	7.81525	264.237	0.330916	0.00125234
3.6	7176.76	917.697	7.82452	264.029	0.322535	0.00122159
3.624	7082.39	904.394	7.83501	263.795	0.324297	0.00122935
3.648	6981.64	892.152	7.84654	263.538	0.325891	0.0012366
3.672	6884.58	876.485	7.85821	263.278	0.328075	0.00124612
3.696	6788.21	863.939	7.87311	262.949	0.329615	0.00125353
3.72	6694.94	849.606	7.88771	262.627	0.331517	0.00126231
3.744	6602.36	835.061	7.9002	262.353	0.333632	0.00127169
3.768	6515.45	821.667	7.91245	262.085	0.335598	0.0012805
3.792	6420.21	809	7.92397	261.834	0.337552	0.00128919
3.816	6333.27	795.758	7.93295	261.639	0.339788	0.00129869
3.84	6251.94	784.943	7.94155	261.453	0.331715	0.00126874
3.864	6160	774.086	7.94764	261.321	0.333714	0.00127703
3.888	6071.34	762.171	7.95139	261.24	0.336084	0.0012865
3.912	5988.37	753.029	7.95346	261.195	0.338035	0.00129418
3.936	5906.91	742.686	7.95487	261.165	0.340299	0.001303
3.96	5823.94	732.4	7.95549	261.151	0.342648	0.00131207
3.984	5741.86	722.514	7.95536	261.154	0.345004	0.00132107
4.008	5657.2	711.8	7.95689	261.121	0.347501	0.0013308
4.032	5579.34	701.6	7.95617	261.137	0.350048	0.00134048
4.056	5501.97	691.943	7.95628	261.134	0.352478	0.0013498
4.08	5432.78	682.027	7.95673	261.125	0.345242	0.00132214
4.104	5355.3	672.486	7.95664	261.127	0.347694	0.00133151
4.128	5287.14	663	7.95821	261.093	0.350054	0.00134073
4.152	5212.03	654.946	7.96395	260.969	0.351908	0.00134846
4.176	5140.84	646.351	7.97116	260.814	0.35383	0.00135664
4.2	5069.51	637	7.97678	260.694	0.356077	0.00136588
4.224	4998.05	628.622	7.98297	260.561	0.358096	0.00137433
4.248	4924.11	618.27	7.98933	260.426	0.360671	0.00138493
4.272	4858.49	606.486	7.99731	260.255	0.363565	0.00139695
4.296	4796.84	597.243	8.00726	260.044	0.365719	0.00140638
4.32	4737.69	591.231	8.0202	259.769	0.357316	0.00137551
4.344	4678.33	582.333	8.03196	259.521	0.359296	0.00138446
4.368	4616.08	574.615	8.04528	259.241	0.360921	0.00139222
4.392	4556.69	565.179	8.05919	258.949	0.36303	0.00140194
4.416	4498.9	557.667	8.06854	258.754	0.364904	0.00141024
4.44	4439.31	548.333	8.07763	258.564	0.367386	0.00142087
4.464	4380.46	541.615	8.08983	258.311	0.368954	0.00142833
4.488	4318.38	533.308	8.09798	258.142	0.371306	0.00143838
4.512	4264.74	525.385	8.10577	257.981	0.373579	0.00144809
4.536	4205.62	518.333	8.11186	257.856	0.375754	0.00145723
4.56	4154.27	510.878	8.11885	257.712	0.368683	0.0014306
4.584	4099.34	503.146	8.12319	257.622	0.371208	0.0014409
4.608	4040.54	497.39	8.12924	257.498	0.37305	0.00144875
4.632	3983.66	490.659	8.13433	257.394	0.375307	0.00145811
4.656	3929.83	483.415	8.14038	257.27	0.377719	0.00146818
4.68	3880.63	476.488	8.14835	257.107	0.379935	0.00147773
4.704	3832.37	470.585	8.15564	256.959	0.38187	0.00148611
4.728	3781.41	463.732	8.16324	256.804	0.384192	0.00149605
4.752	3734.41	458.024	8.17689	256.527	0.385748	0.00150373
4.776	3686.56	450.463	8.19086	256.245	0.388037	0.00151432
4.8	3644.09	444.326	8.20687	255.923	0.380511	0.00148682
4.824	3599.26	438.302	8.22454	255.57	0.382033	0.00149483
4.848	3549.88	431.279	8.24327	255.197	0.383959	0.00150456
4.872	3506.44	423.814	8.2635	254.796	0.386002	0.00151495
4.896	3459.53	418.186	8.2852	254.368	0.387291	0.00152256
4.92	3417.79	411.512	8.30374	254.005	0.389222	0.00153234
4.944	3372.84	404.488	8.32219	253.646	0.391393	0.00154307
4.968	3330.23	398.837	8.34197	253.262	0.392936	0.0015515
4.992	3288.21	392.535	8.35907	252.932	0.394979	0.0015616
5.016	3246.74	386.884	8.3739	252.648	0.396919	0.00157104
5.04	3208.44	382.511	8.38933	252.352	0.389309	0.00154272
5.064	3169.38	377.111	8.40142	252.122	0.39133	0.00155215
5.088	3131.82	371.533	8.41225	251.916	0.393551	0.00156223
5.112	3090	367.022	8.42359	251.702	0.395313	0.00157056
5.136	3050.69	361.6	8.43271	251.529	0.397677	0.00158104
5.16	3014.16	357.022	8.43868	251.417	0.399846	0.00159037
5.184	2979.13	353.044	8.44634	251.273	0.401642	0.00159843
5.208	2941.96	347.844	8.45753	251.063	0.403907	0.00160879
5.232	2908.29	343.178	8.46724	250.881	0.406013	0.00161835
5.256	2871.71	338.756	8.47821	250.676	0.407981	0.00162752
5.28	2838.89	335.66	8.4893	250.47	0.400432	0.00159873
5.304	2803.55	330.915	8.4998	250.275	0.402629	0.00160875
5.328	2770.89	324.936	8.5147	249.999	0.405283	0.00162114
5.352	2736.85	320.617	8.52746	249.764	0.407215	0.0016304
5.376	2700.57	316.234	8.53849	249.562	0.409354	0.00164029
5.4	2667.55	311.681	8.55196	249.315	0.411471	0.0016504
5.424	2634.21	307.809	8.56977	248.99	0.412975	0.0016586
5.448	2602.13	302.489	8.58638	248.689	0.415469	0.00167064
5.472	2567.51	298.617	8.59841	248.471	0.417434	0.00168001
5.496	2536.34	295.064	8.60955	248.27	0.419267	0.00168875
5.52	2509.65	290.959	8.62132	248.059	0.412729	0.00166384
5.544	2480.02	286.592	8.632	247.867	0.415151	0.00167489
5.568	2449.35	283	8.6469	247.601	0.416877	0.00168366
5.592	2418.73	279.306	8.65807	247.403	0.418939	0.00169335
5.616	2390.51	276.082	8.66941	247.201	0.420695	0.00170183
5.64	2363.9	272.673	8.68072	247.001	0.422604	0.00171094
5.664	2336.69	269.327	8.69124	246.815	0.424566	0.00172018
5.688	2312.37	265.122	8.7022	246.623	0.427134	0.00173194
5.712	2287.24	262.143	8.71209	246.449	0.428942	0.00174049
5.736	2260.45	259.143	8.72624	246.201	0.430557	0.0017488
5.76	2236.84	256.51	8.74274	245.914	0.423207	0.00172096
5.784	2211.84	253.039	8.75984	245.617	0.42502	0.00173042
5.808	2185.43	249.078	8.77746	245.312	0.427242	0.00174162
5.832	2158.63	246.314	8.78934	245.108	0.428943	0.00175002
5.856	2132.65	241.922	8.80216	244.888	0.431913	0.00176371
5.88	2109.86	238.667	8.81496	244.669	0.434009	0.00177386
5.904	2085.14	235.412	8.82717	244.461	0.436213	0.00178439
5.928	2059.92	232.235	8.83967	244.249	0.438391	0.00179486
5.952	2034.86	229.863	8.84707	244.123	0.440239	0.00180335
5.976	2012.98	227.039	8.85634	243.966	0.442365	0.00181322
6	1993.13	224.868	8.86	243.904	0.435813	0.00178682
6.024	1968.57	222.321	8.862	243.871	0.438204	0.00179687
6.048	1946.42	219.226	8.86184	243.873	0.441235	0.00180928
6.072	1922.81	217.132	8.86272	243.859	0.443362	0.00181811
6.096	1901.94	214.528	8.86781	243.773	0.445705	0.00182836
6.12	1878.58	212.132	8.87181	243.705	0.447993	0.00183826
6.144	1858.23	209.679	8.8758	243.638	0.45034	0.0018484
6.168	1835.79	207.302	8.88265	243.523	0.452505	0.00185816
6.192	1814.79	204.377	8.89	243.4	0.455207	0.0018702
6.216	1794.98	201.491	8.90511	243.147	0.45743	0.00188129
6.24	1776.55	199.382	8.92274	242.853	0.45031	0.00185425
6.264	1755.58	197.091	8.942	242.534	0.451737	0.00186257
6.288	1735.65	194.364	8.9601	242.235	0.453717	0.00187304
6.312	1716.45	191.582	8.97806	241.94	0.455811	0.00188398
6.336	1699.36	188.364	8.99393	241.681	0.458543	0.00189731
6.36	1679.98	185.436	9.00903	241.435	0.461112	0.00190988
6.384	1660.04	183.073	9.02666	241.148	0.462959	0.00191981
6.408	1641.75	181.182	9.05053	240.763	0.463898	0.00192678
6.432	1623	179.273	9.07385	240.388	0.464932	0.00193409
6.456	1605.55	177.327	9.09642	240.028	0.466072	0.00194174
6.48	1590.75	175.298	9.11539	239.726	0.459257	0.00191576
6.504	1572.63	172.737	9.13114	239.477	0.461614	0.00192759
6.528	1557.3	169.825	9.14817	239.209	0.464347	0.00194118
6.552	1538.98	167.526	9.16801	238.898	0.466264	0.00195173
6.576	1522.33	165.333	9.18689	238.603	0.468136	0.00196199
6.6	1504.23	162.965	9.20633	238.3	0.470275	0.00197345
6.624	1487.14	161.07	9.2271	237.979	0.471752	0.00198232
6.648	1471.21	158.965	9.24594	237.689	0.473653	0.00199274
6.672	1455.91	156.895	9.2575	237.512	0.475995	0.00200409
6.696	1439.67	155.456	9.26697	237.367	0.477655	0.00201231
6.72	1425.54	153.814	9.27475	237.248	0.4715	0.00198737
6.744	1410.75	151.644	9.28109	237.151	0.474387	0.00200036
6.768	1394.36	149.746	9.28985	237.018	0.476826	0.00201177
6.792	1378.19	148.237	9.29854	236.886	0.478748	0.00202101
6.816	1363.37	146.746	9.30417	236.801	0.480845	0.00203059
6.84	1348.78	145.136	9.31432	236.647	0.482871	0.00204047
6.864	1333.69	143.407	9.3255	236.478	0.485062	0.0020512
6.888	1321.44	141.644	9.33483	236.337	0.487417	0.00206238
6.912	1306.22	139.695	9.34359	236.206	0.490206	0.00207533
6.936	1290.69	138.169	9.35567	236.025	0.492172	0.00208526
6.96	1279.44	136.508	9.37148	235.788	0.48592	0.00206083
6.984	1265.48	134.754	9.38603	235.572	0.488128	0.0020721
7.008	1251.41	133.049	9.40294	235.321	0.490163	0.00208296
7.032	1238.28	131.623	9.4169	235.114	0.491942	0.00209235
7.056	1224.98	129.902	9.43057	234.913	0.494286	0.00210412
7.08	1211.31	127.984	9.44745	234.665	0.496839	0.00211723
7.104	1198.41	126.77	9.46206	234.451	0.498329	0.00212551
7.128	1184.82	124.902	9.47603	234.248	0.501089	0.00213914
7.152	1172.15	123.607	9.48756	234.08	0.502995	0.00214882
7.176	1159.43	122.033	9.50029	233.895	0.505384	0.00216073
7.2	1149.29	120.635	9.51228	233.722	0.499364	0.00213657
7.224	1137.81	119.349	9.5213	233.592	0.501471	0.00214678
7.248	1124.14	117.778	9.53366	233.414	0.504009	0.00215929
7.272	1113.17	116.778	9.54504	233.251	0.505485	0.00216713
7.296	1101.63	115.381	9.55994	233.038	0.507568	0.00217805
7.32	1090.52	114.048	9.57536	232.818	0.509527	0.00218852
7.344	1078.13	112.73	9.59012	232.608	0.511569	0.00219927
7.368	1065.79	111.143	9.60866	232.345	0.513981	0.00221214
7.392	1055.1	109.778	9.62369	232.133	0.516169	0.00222359
7.416	1044.3	108.254	9.64195	231.877	0.51855	0.00223632
7.44	1034.6	106.985	9.66068	231.615	0.512311	0.00221191
7.464	1023.34	105.615	9.67984	231.348	0.514386	0.00222343
7.488	1012.25	103.954	9.69923	231.079	0.517156	0.00223801
7.512	1001.62	103.154	9.71638	230.842	0.518162	0.00224466
7.536	991.6	101.877	9.73565	230.577	0.520144	0.00225584
7.56	980.631	100.538	9.75203	230.352	0.522525	0.00226837
7.584	970.662	99.3231	9.76664	230.153	0.524754	0.00228002
7.608	961.462	98.3385	9.78117	229.955	0.526457	0.00228939
7.632	951.631	97.3231	9.79126	229.818	0.528563	0.00229992
7.656	942.723	95.9692	9.80421	229.642	0.531353	0.00231383
7.68	934.582	95.1045	9.81398	229.51	0.525123	0.00228801
7.704	924.582	94.0448	9.82087	229.418	0.527635	0.00229989
7.728	915.97	93	9.83071	229.285	0.529933	0.00231124
7.752	907.09	92.1045	9.84321	229.117	0.531726	0.00232076
7.776	897.448	91.0896	9.85713	228.931	0.533801	0.00233171
7.8	886.985	90.1343	9.86284	228.854	0.536293	0.00234338
7.824	877.478	89.2687	9.86945	228.766	0.538501	0.00235393
7.848	868.94	87.9403	9.87721	228.663	0.541932	0.00237
7.872	860.194	86.7612	9.88533	228.555	0.545002	0.00238456
7.896	851.119	85.7015	9.89624	228.41	0.547624	0.00239755
7.92	843.609	85.3333	9.9044	228.302	0.540394	0.00236701
7.944	833.71	84.2174	9.91195	228.202	0.543453	0.00238145
7.968	824.957	83.1884	9.9193	228.105	0.546295	0.00239492
7.992	816.246	82.1304	9.92229	228.066	0.549557	0.00240964
8.016	807.594	81.0145	9.92243	228.064	0.553244	0.00242583
8.04	798.681	80.3333	9.92094	228.084	0.555747	0.00243659
8.064	790.594	79.6667	9.92015	228.094	0.558166	0.00244709
8.088	781.638	78.8696	9.91778	228.125	0.561167	0.00245991
8.112	774.435	78.1159	9.91686	228.138	0.563919	0.00247184
8.136	767.13	77.3623	9.91438	228.17	0.566816	0.00248418
8.16	760.225	76.6761	9.91279	228.191	0.561378	0.00246012
8.184	752.211	76.1549	9.91242	228.196	0.563417	0.002469
8.208	743.845	75.338	9.91828	228.119	0.566089	0.00248156
8.232	736.014	74.2958	9.92478	228.033	0.569531	0.00249758
8.256	728.817	73.5352	9.93388	227.913	0.571855	0.00250909
8.28	721.662	72.5211	9.9427	227.797	0.575148	0.00252482
8.304	713.859	71.831	9.95265	227.667	0.577278	0.00253562
8.328	707.901	70.8732	9.9659	227.494	0.580147	0.00255017
8.352	701.831	70.3099	9.97901	227.323	0.581609	0.00255851
8.376	694.775	69.3803	9.98617	227.23	0.584927	0.00257417
8.4	688.986	68.8082	9.99957	227.056	0.578367	0.00254725
8.424	682.603	68.0959	10.0059	226.974	0.580938	0.00255949
8.448	675.808	67.4247	10.0146	226.861	0.583243	0.00257093
8.472	668.849	66.7671	10.0153	226.852	0.586076	0.00258352
8.496	662.178	66.3151	10.0162	226.84	0.588096	0.00259256
8.52	656.562	65.274	10.016	226.843	0.592584	0.00261231
8.544	649.397	64.8082	10.0163	226.84	0.594797	0.0026221
8.568	642.466	64.0274	10.0198	226.794	0.598132	0.00263734
8.592	635.356	63.5616	10.0258	226.716	0.600014	0.00264654
8.616	628.945	62.9452	10.0355	226.591	0.602289	0.00265805
8.64	624.08	62.3333	10.0484	226.426	0.596193	0.00263305
8.664	617.76	61.68	10.0544	226.349	0.598922	0.00264601
8.688	611.853	60.8	10.0674	226.183	0.602226	0.00266256
8.712	606.293	60.0933	10.0824	225.991	0.604658	0.00267559
8.736	599.92	59.2533	10.0986	225.786	0.607727	0.00269161
8.76	593.667	58.6267	10.1158	225.567	0.609779	0.00270332
8.784	588.2	58.0933	10.1307	225.379	0.611553	0.00271345
8.808	582.947	57.36	10.1452	225.196	0.614352	0.00272807
8.832	576.907	56.56	10.1553	225.07	0.617888	0.00274531
8.856	571.48	56.1733	10.1615	224.993	0.619656	0.00275412
8.88	567.143	55.7013	10.166	224.936	0.613812	0.00272882
8.904	561.922	55.2208	10.1704	224.88	0.616185	0.00274006
8.928	556.844	54.7273	10.1765	224.805	0.618545	0.00275147
8.952	551.104	54.1688	10.1773	224.794	0.62167	0.0027655
8.976	546.247	53.7792	10.175	224.823	0.624125	0.00277607
9	541.078	53.1818	10.1775	224.793	0.627401	0.00279102
9.024	536.532	52.7273	10.1783	224.782	0.630038	0.00280288
9.048	531.675	52.1688	10.1804	224.755	0.633206	0.00281731
9.072	526.052	51.7143	10.1823	224.733	0.635907	0.00282962
9.096	521	51.2078	10.183	224.724	0.638988	0.00284344
9.12	517.139	50.6962	10.1909	224.625	0.633391	0.00281977
9.144	511.481	50.1899	10.2022	224.484	0.635807	0.00283231
9.168	507.266	49.7342	10.2106	224.381	0.638101	0.00284383
9.192	502.785	49.3165	10.2165	224.308	0.640394	0.00285498
9.216	498.127	48.9241	10.2282	224.162	0.64216	0.00286471
9.24	493.684	48.1899	10.2403	224.014	0.645999	0.00288375
9.264	488.861	47.4684	10.2489	223.907	0.650122	0.00290353
9.288	484.38	47.1772	10.2575	223.801	0.651595	0.00291149
9.312	479.835	46.7848	10.2658	223.7	0.653762	0.00292249
9.336	475.582	46.1646	10.2764	223.57	0.657243	0.00293977
9.36	472.062	45.8025	10.288	223.428	0.650799	0.00291279
9.384	467.37	45.3951	10.2949	223.344	0.653254	0.00292487
9.408	462.481	44.963	10.3	223.282	0.656045	0.00293819
9.432	458.235	44.5309	10.3083	223.181	0.658616	0.00295103
9.456	453.864	44.0123	10.3189	223.053	0.66166	0.00296638
9.48	449.667	43.6173	10.3266	222.96	0.664102	0.00297857
9.504	445.037	43.1235	10.3349	222.859	0.667259	0.00299409
9.528	440.926	42.5802	10.3455	222.731	0.67063	0.00301094
9.552	436.951	42.1852	10.3595	222.563	0.672738	0.00302269
9.576	433.346	41.7778	10.3753	222.372	0.674812	0.0030346
9.6	429.976	41.3976	10.3907	222.188	0.668536	0.00300888
9.624	425.952	40.9639	10.4111	221.945	0.670567	0.00302132
9.648	421.759	40.506	10.4298	221.723	0.672956	0.00303512
9.672	417.578	40	10.4446	221.548	0.676052	0.00305149
9.696	413.675	39.5301	10.4589	221.379	0.678951	0.00306691
9.72	409.675	39.0843	10.4724	221.221	0.681788	0.00308193
9.744	405.458	38.494	10.4842	221.082	0.685986	0.00310286
9.768	401.639	38.1566	10.4934	220.974	0.688361	0.00311512
9.792	397.53	37.7952	10.5036	220.855	0.690925	0.00312841
9.816	393.88	37.4578	10.5104	220.776	0.693537	0.00314136
9.84	390.247	37.0941	10.5161	220.709	0.688248	0.00311835
9.864	386.906	36.7882	10.5246	220.61	0.690495	0.00312993
9.888	383.412	36.5176	10.5309	220.537	0.692643	0.0031407
9.912	379.6	36.0706	10.5397	220.435	0.696207	0.00315833
9.936	376.424	35.8	10.5547	220.262	0.697758	0.00316786
9.96	372.941	35.4235	10.574	220.039	0.699997	0.00318125
9.984	369.129	34.9059	10.5942	219.807	0.70355	0.00320076
10.008	365.576	34.4824	10.6121	219.601	0.706455	0.00321699
10.032	362.424	34.1176	10.631	219.386	0.70877	0.0032307
10.056	359.329	33.6353	10.6487	219.185	0.712353	0.00325001
10.08	356.368	33.2184	10.6651	218.999	0.707196	0.00322921
10.104	352.885	32.8506	10.6783	218.851	0.710139	0.00324485
10.128	349.897	32.6552	10.6933	218.681	0.711235	0.00325238
10.152	346.678	32.3793	10.7069	218.528	0.713282	0.00326403
10.176	343.609	32.0575	10.7237	218.34	0.715585	0.00327739
10.2	340.759	31.8621	10.7384	218.177	0.716772	0.00328528
10.224	336.874	31.5632	10.7468	218.083	0.719599	0.00329966
10.248	333.448	31.046	10.7579	217.959	0.724553	0.00332426
10.272	330.092	30.7011	10.7773	217.744	0.72714	0.00333942
10.296	326.966	30.2529	10.7984	217.512	0.730782	0.00335974
10.32	324.337	29.9101	10.8251	217.218	0.724591	0.00333578
10.344	321.348	29.6966	10.8509	216.936	0.725365	0.00334369
10.368	318.36	29.3034	10.8838	216.578	0.727688	0.00335994
10.392	315.449	28.8652	10.906	216.338	0.731388	0.00338076
10.416	312.056	28.5281	10.9302	216.077	0.733894	0.00339644
10.44	308.843	28.0449	10.9519	215.845	0.738389	0.00342092
10.464	305.685	27.8427	10.9717	215.634	0.739712	0.00343041
10.488	302.899	27.4494	10.9903	215.436	0.743466	0.00345099
10.512	300.157	27.3258	11.0037	215.294	0.74431	0.00345717
10.536	297.742	27.0225	11.0136	215.189	0.747647	0.00347437
10.56	295.462	26.7473	11.0178	215.144	0.742793	0.00345253
10.584	292.692	26.4615	11.016	215.164	0.746886	0.00347124
10.608	289.824	26.2857	11.0201	215.121	0.74918	0.0034826
10.632	286.648	26.033	11.0237	215.083	0.752583	0.00349904
10.656	283.835	25.7143	11.0367	214.946	0.756192	0.00351806
10.68	281.505	25.6264	11.0455	214.853	0.756985	0.00352327
10.704	279.033	25.3846	11.0511	214.794	0.760141	0.00353894
10.728	276.44	25.0769	11.0522	214.782	0.76462	0.00355997
10.752	274.187	24.7582	11.058	214.721	0.76894	0.00358111
10.776	271.209	24.3736	11.0653	214.646	0.774285	0.00360727
10.8	268.925	24.1935	11.0712	214.584	0.768348	0.00358065
10.824	266.484	23.9892	11.0804	214.488	0.770943	0.00359435
10.848	263.839	23.828	11.0887	214.401	0.773025	0.00360551
10.872	261.032	23.5376	11.0977	214.306	0.777043	0.00362585
10.896	258.065	23.2688	11.1066	214.214	0.780845	0.00364516
10.92	255.731	23.0323	11.1103	214.176	0.784528	0.00366301
10.944	253.194	22.8387	11.1196	214.08	0.787185	0.00367707
10.968	250.634	22.6129	11.1281	213.992	0.790465	0.0036939
10.992	248.419	22.3333	11.1433	213.834	0.794107	0.00371366
11.016	245.667	21.9892	11.1599	213.664	0.798877	0.00373895
11.04	243.453	21.8	11.1747	213.511	0.792728	0.00371282
11.064	240.537	21.4421	11.1868	213.387	0.798243	0.00374081
11.088	238.063	21.2526	11.1994	213.259	0.800877	0.00375542
11.112	235.937	20.9895	11.2161	213.088	0.804476	0.00377532
11.136	233.863	20.7474	11.2265	212.982	0.80826	0.00379496
11.16	231.474	20.5684	11.2284	212.963	0.811675	0.00381134
11.184	229.095	20.3895	11.2356	212.89	0.814722	0.00382697
11.208	226.495	20.1789	11.2428	212.818	0.81844	0.00384573
11.232	224.768	19.9474	11.2516	212.728	0.822353	0.00386575
11.256	222.274	19.7789	11.2485	212.759	0.826181	0.00388317
11.28	220.165	19.6701	11.2473	212.771	0.820106	0.0038544
11.304	217.979	19.3814	11.2444	212.801	0.826261	0.00388278
11.328	215.68	19.0928	11.2371	212.875	0.832909	0.00391267
11.352	213.515	18.8969	11.2324	212.923	0.837583	0.00393374
11.376	211.309	18.8557	11.2246	213.002	0.839403	0.00394083
11.4	209.041	18.567	11.2204	213.045	0.846085	0.00397139
11.424	207.072	18.4536	11.2176	213.073	0.849017	0.00398464
11.448	204.608	18.3402	11.2113	213.137	0.852358	0.0039991
11.472	202.371	18.1134	11.2009	213.243	0.858479	0.00402582
11.496	200.474	17.9278	11.1903	213.352	0.863761	0.00404852
11.52	199.071	17.7879	11.1917	213.338	0.858202	0.00402274
11.544	197.323	17.6768	11.1873	213.382	0.861345	0.00403663
11.568	195.313	17.4747	11.1845	213.411	0.866498	0.00406024
11.592	193.374	17.2929	11.1936	213.318	0.870263	0.00407966
11.616	191.333	17.1111	11.2046	213.206	0.873961	0.00409914
11.64	189.646	16.899	11.2125	213.125	0.878634	0.00412262
11.664	187.98	16.7677	11.2251	212.997	0.881039	0.0041364
11.688	185.828	16.6061	11.2353	212.893	0.884523	0.00415477
11.712	183.97	16.3434	11.2436	212.809	0.890681	0.00418536
11.736	182.051	16.1212	11.2476	212.769	0.896345	0.00421276
11.76	180.644	16.0297	11.248	212.765	0.889998	0.00418301
11.784	178.822	15.7822	11.2465	212.779	0.896872	0.00421503
11.808	177.05	15.703	11.2478	212.767	0.899205	0.00422625
11.832	175.495	15.5743	11.2597	212.646	0.901911	0.00424137
11.856	173.832	15.4851	11.2653	212.59	0.904167	0.0042531
11.88	172.109	15.3861	11.2625	212.618	0.907438	0.00426793
11.904	170.545	15.2178	11.2618	212.625	0.912438	0.00429129
11.928	168.812	15.0396	11.2549	212.695	0.918367	0.00431777
11.952	167.584	14.802	11.2565	212.679	0.925248	0.00435044
11.976	166.287	14.6931	11.257	212.673	0.928636	0.00436649
12	164.893	14.6408	11.2629	212.614	0.920882	0.00433124
12.024	163.34	14.5049	11.2711	212.531	0.924477	0.00434983
12.048	161.835	14.3786	11.2778	212.464	0.927954	0.00436758
12.072	160.388	14.2039	11.2904	212.337	0.932405	0.00439116
12.096	159.155	14.1165	11.2992	212.249	0.934575	0.00440319
12.12	157.631	13.9612	11.3109	212.132	0.938667	0.00442492
12.144	156.107	13.8447	11.3215	212.026	0.941714	0.00444151
12.168	154.864	13.7282	11.3329	211.912	0.944669	0.00445784
12.192	153.573	13.5146	11.3435	211.807	0.950878	0.00448937
12.216	152.087	13.3204	11.3492	211.75	0.957084	0.00451989
12.24	150.981	13.1905	11.3504	211.738	0.952384	0.00449793
12.264	149.562	13.1429	11.3492	211.75	0.954441	0.00450738
12.288	148.133	13.0095	11.3501	211.741	0.959207	0.0045301
12.312	146.638	12.8952	11.35	211.742	0.963513	0.00455041
12.336	145.343	12.8	11.3438	211.804	0.96771	0.0045689
12.36	143.829	12.7429	11.3374	211.867	0.970696	0.00458162
12.384	142.524	12.6381	11.3202	212.039	0.976322	0.00460446
12.408	141.457	12.5333	11.3129	212.112	0.981043	0.00462511
12.432	140.076	12.419	11.3049	212.192	0.986311	0.00464821
12.456	138.771	12.2857	11.2908	212.333	0.992917	0.00467621
12.48	137.972	12.1589	11.2794	212.448	0.989588	0.00465804
12.504	136.243	12.1028	11.2709	212.533	0.992998	0.00467221
12.528	135.056	11.9533	11.2585	212.658	1.00022	0.00470341
12.552	133.794	11.8411	11.2431	212.814	1.00642	0.00472909
12.576	132.495	11.8131	11.229	212.957	1.00927	0.0047393
12.6	131.402	11.7009	11.2121	213.13	1.01568	0.00476557
12.624	130.14	11.6262	11.1852	213.404	1.02171	0.00478767
12.648	128.794	11.5607	11.1618	213.644	1.0271	0.00480753
12.672	127.477	11.4673	11.1324	213.947	1.0343	0.00483436
12.696	126.215	11.3458	11.0992	214.292	1.04314	0.00486786
12.72	125.358	11.2844	11.0762	214.531	1.03871	0.00484177
12.744	124.101	11.2294	11.0456	214.852	1.0446	0.00486193
12.768	123.018	11.1835	11.0286	215.031	1.04868	0.0048769
12.792	121.835	11.1009	11.0149	215.175	1.05409	0.00489874
12.816	121.073	11.0734	10.9975	215.36	1.05738	0.00490982
12.84	120.202	10.9633	10.9729	215.62	1.06512	0.00493981
12.864	119.119	10.9358	10.9498	215.868	1.0692	0.00495305
12.888	118.046	10.7248	10.93	216.08	1.08132	0.00500426
12.912	116.862	10.633	10.9194	216.194	1.08719	0.00502877
12.936	115.358	10.5596	10.9161	216.229	1.09159	0.00504831
12.96	114.414	10.5405	10.919	216.199	1.08268	0.00500779
12.984	113.333	10.4414	10.9246	216.138	1.0872	0.00503011
13.008	112.441	10.3784	10.933	216.048	1.08967	0.00504365
13.032	111.378	10.2342	10.9299	216.082	1.09745	0.00507888
13.056	110.577	10.1081	10.917	216.22	1.10545	0.00511262
13.08	109.649	10	10.913	216.263	1.11175	0.00514072
13.104	108.568	9.84685	10.9119	216.274	1.12022	0.00517961
13.128	107.676	9.8018	10.9148	216.243	1.12263	0.00519154
13.152	106.856	9.73874	10.9218	216.168	1.12554	0.00520679
13.176	105.658	9.73874	10.9241	216.143	1.12582	0.00520865
13.2	104.947	9.64602	10.9171	216.218	1.1218	0.00518828
13.224	104.212	9.61062	10.9081	216.315	1.12503	0.00520089
13.248	103.274	9.48673	10.8957	216.45	1.13357	0.00523713
13.272	102.345	9.38053	10.8847	216.569	1.14112	0.0052691
13.296	101.265	9.28319	10.8705	216.723	1.14873	0.00530046
13.32	100.363	9.23894	10.8677	216.753	1.152	0.00531481
13.344	99.5221	9.15929	10.861	216.826	1.15777	0.00533961
13.368	98.7699	9.0708	10.8553	216.888	1.16396	0.00536665
13.392	97.6814	8.99115	10.847	216.979	1.1702	0.00539313
13.416	96.6726	8.93805	10.8363	217.095	1.17515	0.00541305
13.44	95.9565	8.86957	10.82	217.274	1.17129	0.00539083
13.464	95	8.7913	10.8099	217.385	1.17775	0.00541781
13.488	94.0261	8.72174	10.8054	217.435	1.18309	0.00544115
13.512	93.4	8.65217	10.7907	217.596	1.18954	0.00546672
13.536	92.6348	8.58261	10.7845	217.665	1.19512	0.00549062
13.56	91.8	8.55652	10.7832	217.679	1.1974	0.00550074
13.584	91.4348	8.50435	10.7849	217.661	1.20075	0.00551662
13.608	90.7652	8.3913	10.7908	217.595	1.20778	0.00555056
13.632	89.7391	8.36522	10.797	217.527	1.20932	0.0055594
13.656	88.8957	8.23478	10.7972	217.525	1.21852	0.00560173
13.68	88.0769	8.15385	10.7932	217.569	1.2145	0.00558212
13.704	87.5299	8.07692	10.801	217.483	1.21913	0.00560564
13.728	86.6923	7.97436	10.8068	217.419	1.22606	0.00563917
13.752	86.0513	7.93162	10.807	217.416	1.22944	0.00565476
13.776	85.265	7.89744	10.8166	217.312	1.23116	0.00566543
13.8	84.6154	7.87179	10.8291	217.175	1.23184	0.00567212
13.824	84.0256	7.76923	10.8367	217.091	1.23867	0.00570576
13.848	83.4701	7.71795	10.8459	216.99	1.24163	0.00572203
13.872	82.8547	7.65812	10.8523	216.921	1.24565	0.00574241
13.896	82.3077	7.59829	10.8758	216.665	1.24753	0.00575787
13.92	81.8571	7.48739	10.9166	216.224	1.24058	0.00573748
13.944	81.0504	7.44538	10.9618	215.74	1.23873	0.00574179
13.968	80.521	7.36134	11.0065	215.264	1.24004	0.00576058
13.992	79.8992	7.30252	11.0569	214.733	1.23888	0.0057694
14.016	79.3445	7.14286	11.1009	214.273	1.24651	0.00581737
14.04	78.7143	7	11.1465	213.802	1.253	0.00586056
14.064	77.9664	6.93277	11.1843	213.413	1.25447	0.00587816
14.088	77.2521	6.83193	11.2175	213.074	1.25941	0.00591067
14.112	76.5294	6.73109	11.2397	212.848	1.26584	0.00594716
14.136	75.7983	6.70588	11.2652	212.591	1.26545	0.00595253
14.16	75.3058	6.64463	11.2822	212.42	1.25856	0.00592487
14.184	74.6612	6.57851	11.2903	212.338	1.26382	0.00595194
14.208	74.1074	6.58678	11.3008	212.233	1.26223	0.00594737
14.232	73.3802	6.56198	11.3042	212.199	1.26452	0.00595911
14.256	72.8017	6.4876	11.2983	212.258	1.27228	0.005994
14.28	72.157	6.38843	11.3	212.241	1.28157	0.00603826
14.304	71.4711	6.30579	11.2993	212.248	1.28984	0.00607704
14.328	70.9835	6.24793	11.2924	212.318	1.29652	0.00610652
14.352	70.3223	6.19835	11.2913	212.328	1.30189	0.00613153
14.376	69.6942	6.16529	11.3012	212.229	1.30435	0.00614599
14.4	69.2195	6.11382	11.3088	212.153	1.29813	0.00611884
14.424	68.6911	6.06504	11.312	212.121	1.30293	0.0061424
14.448	68.0976	6.04065	11.3152	212.089	1.30541	0.00615502
14.472	67.439	6	11.3253	211.988	1.30874	0.00617365
14.496	66.8293	5.9187	11.3406	211.835	1.31555	0.00621026
14.52	66.2683	5.86179	11.3583	211.66	1.31967	0.00623485
14.544	65.6748	5.79675	11.3727	211.517	1.32515	0.00626497
14.568	65.2602	5.73984	11.3843	211.402	1.33006	0.00629162
14.592	64.8211	5.65041	11.408	211.169	1.33711	0.00633193
14.616	64.4065	5.5935	11.4311	210.942	1.34081	0.00635628
14.64	64.024	5.568	11.4379	210.876	1.33232	0.00631802
14.664	63.368	5.52	11.4399	210.856	1.33794	0.00634525
14.688	62.768	5.48	11.4405	210.851	1.34286	0.00636877
14.712	62.376	5.408	11.4324	210.93	1.35241	0.00641166
14.736	61.792	5.376	11.4137	211.113	1.35897	0.00643717
14.76	61.192	5.384	11.3953	211.294	1.3609	0.00644081
14.784	60.624	5.352	11.3873	211.373	1.36618	0.00646335
14.808	60.216	5.312	11.3787	211.458	1.37237	0.00649005
14.832	59.56	5.28	11.3623	211.62	1.37891	0.00651598
14.856	59.04	5.24	11.3404	211.838	1.38708	0.00654783
14.88	58.7874	5.19685	11.3231	212.01	1.38384	0.00652723
14.904	58.3071	5.11024	11.3118	212.123	1.39652	0.00658353
14.928	57.7323	5.07087	11.3143	212.098	1.40172	0.00660884
14.952	57.0787	5.06299	11.321	212.031	1.40248	0.00661453
14.976	56.7323	5.02362	11.3296	211.945	1.40673	0.00663723
15	56.252	4.97638	11.3377	211.864	1.41226	0.00666587
15.024	55.7638	4.96063	11.3438	211.804	1.41401	0.00667604
15.048	55.4331	4.88189	11.3365	211.876	1.42576	0.00672923
15.072	55.0709	4.82677	11.3306	211.935	1.4344	0.00676811
15.096	54.6378	4.80315	11.3395	211.846	1.43689	0.00678269
	54.4031	4.7907	11.3429
	53.9845	4.74419	11.3437
	53.5736	4.72868	11.3407
	53.1783	4.69767	11.3263
	52.8062	4.64341	11.3081
	52.4341	4.62791	11.2935
	51.9147	4.58915	11.2818
	51.3488	4.5814	11.2679
	50.7752	4.53488	11.257
	50.5736	4.51163	11.2531
	50.1679	4.47328	11.2438
	49.7939	4.43511	11.2391
	49.3588	4.39695	11.2325
	48.8626	4.35878	11.2402
	48.5496	4.30534	11.2561
	48.0916	4.26718	11.2756
	47.8702	4.24427	11.2978
	47.5344	4.22901	11.3177
	47.1527	4.17557	11.3435
	46.7863	4.1145	11.3713
	46.5564	4.07519	11.3905
	46.1805	4.03008	11.411
	45.8722	4.00752	11.4396
	45.5188	3.95489	11.47
	45.1955	3.92481	11.4965
	44.7444	3.89474	11.5127
	44.3383	3.85714	11.5275
	44.0226	3.79699	11.5557
	43.6842	3.77444	11.5878
	43.3759	3.74436	11.6048
	43.1185	3.73333	11.6201
	43	3.71111	11.6404
	42.7185	3.62963	11.6507
	42.3926	3.59259	11.6532
	42.1037	3.6	11.6572
	41.7185	3.57037	11.6673
	41.4667	3.54074	11.6747
	41.0148	3.53333	11.6883
	40.7185	3.5037	11.696
	40.363	3.47407	11.6842
	40.1241	3.43066	11.6855
	39.7299	3.41606	11.6898
	39.4088	3.35766	11.692
	39.1095	3.29927	11.6994
	38.7591	3.32117	11.706
	38.4599	3.28467	11.7072
	38.1095	3.24818	11.7103
	37.8613	3.22628	11.721
	37.6277	3.21898	11.7205
	37.3869	3.19708	11.7136
	37.2374	3.20144	11.7272
	36.964	3.15108	11.7476
	36.7626	3.1295	11.7523
	36.4604	3.10791	11.7529
	36.2662	3.07914	11.7586
	35.9712	3.04317	11.7594
	35.7986	3	11.7716
	35.5252	3.01439	11.7862
	35.3094	3.00719	11.8081
	35.0863	2.98561	11.8336
	34.8582	2.97872	11.8406
	34.5461	2.93617	11.8399
	34.2411	2.87943	11.8231
	34.1773	2.85106	11.8174
	33.9078	2.8227	11.8166
	33.6312	2.83688	11.8192
	33.4255	2.82979	11.8211
	33.1631	2.8227	11.8095
	32.922	2.80851	11.7909
	32.7872	2.79433	11.7707
	32.6224	2.76923	11.7588
	32.3007	2.75524	11.7678
	32.0629	2.75524	11.7778
	31.8741	2.72727	11.7903
	31.6783	2.69231	11.8022
	31.4056	2.64336	11.8091
	31.1818	2.60839	11.8123
	31.014	2.6014	11.8234
	30.6713	2.58042	11.85
	30.4196	2.56643	11.8771
