# Supplementary material for: Tropospheric temperature measurements with the pure rotational Raman lidar technique using nonlinear calibration functions
Source: Copernicus journal article supplement (doi:10.5194/amt-10-315-2017), 2017-01-27
Supplement: Supplementary file 39 [file 02.10.2014. Temperature profile retrieved using Eq. (13).xlsx]

## Sheet: Лист1
z, km
Altitude	Smoothed signals	Smoothed signals	Smoothed ratio
0.048	573	65.5	8.59143	250.322	3.44801	0.0137743	A1	0.075	282.75	0.143	286.15	0.83	277.15
0.072	743	82	8.45197	252.341	2.48736	0.00985711	-3.16533	0.182	283.75	0.188	285.55	1.51	274.35
0.096	995.333	113	8.38058	253.381	2.11206	0.00833551		0.199	283.55	0.484	282.75	3.05	266.15	3.048	0.877496
0.12	1177.67	135	8.307	254.456	1.92447	0.00756306	B1	0.24	283.25	0.737	280.25	5.61	250.65	5.616	1.45127
0.144	1215.67	150.333	8.2572	255.187	1.82564	0.00715412	2156.11	0.647	280.35	0.835	279.35	7.21	238.15	7.2	0.980342
0.168	1204.67	148.333	8.21704	255.777	1.83321	0.00716723		0.821	277.75	1.517	273.55	9.14	224.15	9.144	2.96833
0.192	1167.67	153.333	8.11769	257.245	1.79977	0.00699632	C1	1.186	273.95	1.555	273.25	12	210.65	12	1.76991
0.216	1124.33	142.667	8.00646	258.901	1.85164	0.0071519	-206610	1.341	274.55	2.11	268.65
0.24	1085.2	140.6	7.94315	259.85	1.4421	0.00554974		1.5	275.35	2.702	268.65
0.264	1046.4	134	7.84723	261.296	1.46982	0.00562511		1.548	275.15	3.053	266.65
0.288	1008.2	129	7.81317	261.813	1.49577	0.00571314		1.605	274.75	3.943	262.05
0.312	976.8	127.6	7.78997	262.165	1.50427	0.00573788		2.242	269.65	4.143	262.05
0.336	954.6	121.8	7.79515	262.087	1.53794	0.00586804		2.449	270.05	4.257	262.05
0.36	928	114.4	7.78307	262.27	1.58306	0.00603598		2.661	268.55	5.195	255.85
0.384	901.8	117.6	7.76429	262.557	1.56511	0.00596105		2.879	267.05	5.59	253.25
0.408	888.4	115.2	7.73749	262.966	1.57911	0.00600499		3.046	265.85	5.62	252.65
0.432	870	110.6	7.70801	263.417	1.60792	0.00610409		3.192	264.45	6.572	244.15
0.456	842.4	109.8	7.69118	263.675	1.61502	0.00612503		3.397	264.45	7.03	240.05
0.48	834.571	107.714	7.66519	264.074	1.37595	0.00521046		3.502	263.55	7.22	239.65
0.504	819.857	109.143	7.60088	265.067	1.36615	0.00515397		3.763	261.45	8.3	232.65
0.528	801.857	106.714	7.59068	265.225	1.38108	0.0052072		3.983	262.45	8.402	232.05
0.552	793	105.857	7.59838	265.106	1.38729	0.00523296		4.168	261.15	9.18	225.45
0.576	785.429	105.143	7.5932	265.186	1.39197	0.00524902		5.002	255.25	10.36	215.85
0.6	784.286	103.857	7.61335	264.874	1.40067	0.00528807		5.497	251.45	10.827	211.45
0.624	774.286	104.571	7.61857	264.793	1.39776	0.0052787		5.6	250.65	11.324	210.05
0.648	768.571	101.714	7.63633	264.519	1.41648	0.00535494		5.718	249.65	11.382	209.85
0.672	771.857	99	7.64876	264.327	1.43384	0.00542448		5.763	249.25	11.74	210.45
0.696	777.571	99.5714	7.66158	264.13	1.43027	0.00541503		5.99	248.05	12.161	211.55
0.72	768.333	97.3333	7.6564	264.21	1.27478	0.00482486		6.036	247.65	13.54	215.25
0.744	771	98.7778	7.63705	264.508	1.26532	0.00478367		6.903	240.35	13.753	216.05
0.768	775	100.556	7.63752	264.501	1.25501	0.00474484		7.2	237.85	15.715	214.55
0.792	781.222	102.111	7.62574	264.682	1.24541	0.00470529		8.398	227.85	16.08	214.25
0.816	798	104.556	7.60098	265.065	1.22984	0.00463975		9.12	222.85
0.84	819.556	110.556	7.59542	265.151	1.19781	0.00451745		10.149	215.05
0.864	852.111	116.111	7.58929	265.246	1.16925	0.00440817		10.3	214.45
0.888	892.444	120.444	7.60136	265.059	1.14786	0.00433057		11.123	209.25
0.912	955.556	128.667	7.6145	264.856	1.11095	0.00419454		11.179	209.05
0.936	1040	138.222	7.64123	264.443	1.07208	0.0040541		11.589	209.35
0.96	1185.45	153	7.67286	263.956	0.921238	0.00349011		11.68	209.45
0.984	1307.73	167.091	7.72722	263.123	0.882891	0.00335543		11.899	209.05
1.008	1458.45	183.727	7.80198	261.983	0.843871	0.00322109		12.061	210.15
1.032	1631.73	207.818	7.87218	260.919	0.796354	0.00305211		12.469	212.75
1.056	1817.18	228.727	7.94085	259.885	0.760957	0.00292806		12.576	213.45
1.08	2019.73	253.091	7.99554	259.065	0.725114	0.00279897		13.47	214.25
1.104	2254	281.364	8.02276	258.658	0.688492	0.00266179		14.322	217.05
1.128	2522.55	309.091	8.04175	258.374	0.656838	0.00254219		15.201	216.75
1.152	2812.27	343.727	8.04945	258.26	0.623022	0.00241239		16.03	216.45
1.176	3118.09	381.091	8.06217	258.07	0.592074	0.00229424
1.2	3465.31	426.462	8.06852	257.976	0.515205	0.00199711
1.224	3794.08	471.462	8.06644	258.007	0.49021	0.00189999
1.248	4127.69	513.692	8.06082	258.09	0.469532	0.00181925
1.272	4477.38	558.077	8.03633	258.455	0.449955	0.00174094
1.296	4813.38	602.308	8.00463	258.929	0.432532	0.00167047
1.32	5162.62	644.154	7.97032	259.442	0.417487	0.00160917
1.344	5532.23	695.231	7.93733	259.937	0.401393	0.00154419
1.368	5917.23	744.385	7.90261	260.46	0.387317	0.00148705
1.392	6292.23	797.308	7.8627	261.062	0.373725	0.00143156
1.416	6655.62	849.692	7.81939	261.718	0.361495	0.00138124
1.44	6988.73	895.467	7.77674	262.367	0.327301	0.00124749
1.464	7337.4	945.2	7.72794	263.112	0.318043	0.00120878
1.488	7669.73	1000.53	7.67931	263.857	0.308763	0.00117019
1.512	8015.13	1055.13	7.62836	264.642	0.300255	0.00113457
1.536	8346.33	1106	7.57969	265.395	0.292872	0.00110353
1.56	8686.87	1154.8	7.5365	266.066	0.286246	0.00107584
1.584	9007.73	1204.6	7.49374	266.734	0.279969	0.00104962
1.608	9319.67	1255.6	7.45458	267.348	0.274003	0.00102489
1.632	9642.33	1305	7.42306	267.843	0.268579	0.00100275
1.656	9957.27	1353.53	7.39608	268.269	0.263576	0.000982505
1.68	10249.9	1393.06	7.3723	268.646	0.243877	0.000907801
1.704	10534.1	1436.29	7.34898	269.015	0.240065	0.000892383
1.728	10808.7	1474.18	7.32743	269.358	0.236822	0.00087921
1.752	11076.6	1513.41	7.31191	269.605	0.233658	0.000866668
1.776	11340.5	1553.59	7.29939	269.805	0.230576	0.000854603
1.8	11591.8	1591.24	7.28651	270.011	0.227782	0.000843603
1.824	11843.9	1630.06	7.27253	270.235	0.225006	0.000832631
1.848	12066.1	1666.41	7.26044	270.428	0.222515	0.000822826
1.872	12279.4	1693.29	7.24654	270.651	0.220644	0.000815231
1.896	12463.6	1718.88	7.23295	270.87	0.218922	0.000808218
1.92	12597.4	1746.05	7.22249	271.038	0.205471	0.000758089
1.944	12763.7	1771.74	7.21348	271.184	0.20395	0.000752073
1.968	12898.6	1791.16	7.20491	271.322	0.202804	0.000747466
1.992	13030.4	1815.05	7.19718	271.446	0.201465	0.000742191
2.016	13146.2	1833.63	7.18733	271.606	0.200411	0.000737876
2.04	13264.1	1846.21	7.17884	271.743	0.199662	0.000734745
2.064	13352.4	1858.21	7.17255	271.845	0.198985	0.000731981
2.088	13425.9	1872.05	7.16648	271.943	0.198244	0.000728989
2.112	13469.7	1882.37	7.15994	272.049	0.197697	0.000726696
2.136	13524.2	1893.26	7.15648	272.105	0.197133	0.000724472
2.16	13515.3	1888.24	7.1538	272.149	0.187726	0.00068979
2.184	13544.4	1895.48	7.15064	272.2	0.187373	0.000688363
2.208	13546.8	1898.05	7.14904	272.226	0.187252	0.000687856
2.232	13537.6	1898.86	7.14829	272.238	0.187222	0.000687714
2.256	13535	1895.38	7.15136	272.189	0.187388	0.000688449
2.28	13516.4	1893.05	7.15745	272.09	0.187531	0.000689225
2.304	13486.1	1886.24	7.16354	271.991	0.18788	0.000690757
2.328	13454.2	1877	7.17178	271.857	0.188348	0.000692819
2.352	13417	1872.95	7.1809	271.71	0.188598	0.000694118
2.376	13357.1	1857.86	7.19185	271.533	0.18937	0.000697412
2.4	13271.4	1840.61	7.20453	271.328	0.181818	0.000670106
2.424	13195.2	1826.43	7.21535	271.153	0.182549	0.00067323
2.448	13115.4	1812.43	7.22483	271.001	0.183277	0.000676297
2.472	13040.4	1801.78	7.2336	270.859	0.183856	0.000678787
2.496	12946.2	1785.74	7.24314	270.706	0.184705	0.000682309
2.52	12865	1767.04	7.25056	270.587	0.185667	0.000686164
2.544	12755.1	1757.13	7.25733	270.478	0.186255	0.000688615
2.568	12648.6	1743.65	7.26287	270.389	0.187008	0.000691625
2.592	12533.1	1725.26	7.26809	270.306	0.188011	0.000695551
2.616	12423.7	1709.26	7.27497	270.196	0.188917	0.000699185
2.64	12276	1688.32	7.2824	270.077	0.182354	0.000675194
2.664	12140.9	1666.6	7.28902	269.971	0.18355	0.000679888
2.688	12015.2	1649.2	7.29726	269.839	0.184555	0.000683945
2.712	11874.9	1628.08	7.3064	269.693	0.185781	0.000688861
2.736	11733.8	1604.48	7.31615	269.538	0.187162	0.000694381
2.76	11600.5	1582.28	7.32757	269.356	0.188501	0.000699821
2.784	11458	1558.2	7.33837	269.184	0.189975	0.000705743
2.808	11312.2	1539.12	7.3513	268.979	0.191224	0.000710925
2.832	11159	1517.28	7.36373	268.781	0.192655	0.000716774
2.856	11014.4	1494.16	7.37587	268.589	0.194181	0.000722968
2.88	10872.8	1470.48	7.3875	268.405	0.188379	0.000701847
2.904	10724.4	1451.22	7.39907	268.222	0.189696	0.000707234
2.928	10578.1	1424.26	7.40919	268.062	0.191484	0.000714325
2.952	10440.3	1406.63	7.42082	267.879	0.192755	0.00071956
2.976	10296.6	1386.3	7.43357	267.678	0.19423	0.000725612
3	10153	1364.44	7.44676	267.471	0.195838	0.000732185
3.024	10016.4	1342.93	7.45958	267.269	0.197452	0.000738775
3.048	9875.26	1322.93	7.47499	267.027	0.199026	0.00074534
3.072	9736.26	1302.04	7.48991	266.794	0.200692	0.000752236
3.096	9599.19	1280.78	7.50701	266.527	0.202436	0.000759534
3.12	9481.24	1261.34	7.52657	266.221	0.196923	0.000739698
3.144	9340.55	1239.62	7.54798	265.888	0.198756	0.00074752
3.168	9204.55	1217.62	7.56911	265.559	0.200652	0.000755581
3.192	9076.72	1195.69	7.59172	265.209	0.202594	0.000763906
3.216	8948.07	1175.79	7.61521	264.845	0.204443	0.000771934
3.24	8828.24	1155.14	7.63886	264.48	0.20639	0.000780361
3.264	8710.79	1134.72	7.66236	264.118	0.208367	0.000788916
3.288	8587.03	1116.48	7.68479	263.773	0.210218	0.000796965
3.312	8472.28	1098.38	7.70588	263.449	0.212081	0.000805014
3.336	8351.72	1079.59	7.72287	263.189	0.214025	0.000813199
3.36	8244.1	1063.06	7.73931	262.938	0.208716	0.000793783
3.384	8131.87	1045.87	7.75387	262.716	0.210516	0.000801309
3.408	8021	1030.74	7.76579	262.534	0.212148	0.00080808
3.432	7913.13	1015.61	7.77521	262.39	0.21379	0.000814779
3.456	7807.42	1003.77	7.78347	262.264	0.215141	0.000820323
3.48	7694.32	987.581	7.79114	262.148	0.216947	0.000827574
3.504	7588.29	972.516	7.79805	262.043	0.218665	0.000834464
3.528	7481.48	958.226	7.80264	261.973	0.220324	0.000841019
3.552	7372.9	945.871	7.80927	261.872	0.221841	0.000847136
3.576	7267.29	931.194	7.81525	261.781	0.223624	0.00085424
3.6	7176.76	917.697	7.82452	261.641	0.21839	0.000834696
3.624	7082.39	904.394	7.83501	261.482	0.220073	0.000841638
3.648	6981.64	892.152	7.84654	261.307	0.221697	0.000848417
3.672	6884.58	876.485	7.85821	261.13	0.223737	0.000856801
3.696	6788.21	863.939	7.87311	260.905	0.2255	0.000864299
3.72	6694.94	849.606	7.88771	260.685	0.227505	0.000872722
3.744	6602.36	835.061	7.9002	260.496	0.229564	0.000881257
3.768	6515.45	821.667	7.91245	260.312	0.231519	0.000889392
3.792	6420.21	809	7.92397	260.138	0.233438	0.00089736
3.816	6333.27	795.758	7.93295	260.003	0.235432	0.000905496
3.84	6251.94	784.943	7.94155	259.874	0.230258	0.000886038
3.864	6160	774.086	7.94764	259.783	0.231945	0.000892844
3.888	6071.34	762.171	7.95139	259.726	0.233779	0.000900099
3.912	5988.37	753.029	7.95346	259.695	0.235239	0.000905828
3.936	5906.91	742.686	7.95487	259.674	0.236886	0.000912242
3.96	5823.94	732.4	7.95549	259.665	0.238553	0.000918696
3.984	5741.86	722.514	7.95536	259.667	0.240186	0.000924978
4.008	5657.2	711.8	7.95689	259.644	0.242003	0.000932059
4.032	5579.34	701.6	7.95617	259.654	0.24374	0.000938709
4.056	5501.97	691.943	7.95628	259.653	0.245438	0.000945253
4.08	5432.78	682.027	7.95673	259.646	0.240422	0.000925962
4.104	5355.3	672.486	7.95664	259.647	0.242124	0.000932512
4.128	5287.14	663	7.95821	259.624	0.24385	0.000939242
4.152	5212.03	654.946	7.96395	259.538	0.24544	0.00094568
4.176	5140.84	646.351	7.97116	259.43	0.247159	0.0009527
4.2	5069.51	637	7.97678	259.345	0.249025	0.000960205
4.224	4998.05	628.622	7.98297	259.253	0.250767	0.000967269
4.248	4924.11	618.27	7.98933	259.158	0.252911	0.000975898
4.272	4858.49	606.486	7.99731	259.038	0.255373	0.00098585
4.296	4796.84	597.243	8.00726	258.889	0.25743	0.000994361
4.32	4737.69	591.231	8.0202	258.696	0.252207	0.000974915
4.344	4678.33	582.333	8.03196	258.52	0.254239	0.000983438
4.368	4616.08	574.615	8.04528	258.322	0.256113	0.000991447
4.392	4556.69	565.179	8.05919	258.115	0.258372	0.001001
4.416	4498.9	557.667	8.06854	257.975	0.260222	0.00100871
4.44	4439.31	548.333	8.07763	257.84	0.262499	0.00101807
4.464	4380.46	541.615	8.08983	257.659	0.264304	0.00102579
4.488	4318.38	533.308	8.09798	257.538	0.266451	0.00103461
4.512	4264.74	525.385	8.10577	257.422	0.268526	0.00104313
4.536	4205.62	518.333	8.11186	257.332	0.27044	0.00105094
4.56	4154.27	510.878	8.11885	257.228	0.265745	0.00103311
4.584	4099.34	503.146	8.12319	257.164	0.267813	0.00104141
4.608	4040.54	497.39	8.12924	257.074	0.269489	0.00104829
4.632	3983.66	490.659	8.13433	256.999	0.271413	0.00105609
4.656	3929.83	483.415	8.14038	256.909	0.273509	0.00106461
4.68	3880.63	476.488	8.14835	256.791	0.275581	0.00107317
4.704	3832.37	470.585	8.15564	256.683	0.277415	0.00108077
4.728	3781.41	463.732	8.16324	256.571	0.279554	0.00108958
4.752	3734.41	458.024	8.17689	256.369	0.281504	0.00109804
4.776	3686.56	450.463	8.19086	256.163	0.284019	0.00110874
4.8	3644.09	444.326	8.20687	255.927	0.279464	0.00109197
4.824	3599.26	438.302	8.22454	255.667	0.281641	0.00110159
4.848	3549.88	431.279	8.24327	255.391	0.284195	0.00111278
4.872	3506.44	423.814	8.2635	255.094	0.286946	0.00112486
4.896	3459.53	418.186	8.2852	254.776	0.289243	0.00113529
4.92	3417.79	411.512	8.30374	254.504	0.291842	0.00114671
4.944	3372.84	404.488	8.32219	254.234	0.294632	0.0011589
4.968	3330.23	398.837	8.34197	253.944	0.297052	0.00116975
4.992	3288.21	392.535	8.35907	253.695	0.299695	0.00118132
5.016	3246.74	386.884	8.3739	253.478	0.302129	0.00119193
5.04	3208.44	382.511	8.38933	253.253	0.297321	0.00117401
5.064	3169.38	377.111	8.40142	253.077	0.299644	0.001184
5.088	3131.82	371.533	8.41225	252.919	0.302048	0.00119425
5.112	3090	367.022	8.42359	252.754	0.304143	0.00120332
5.136	3050.69	361.6	8.43271	252.621	0.306565	0.00121353
5.16	3014.16	357.022	8.43868	252.535	0.308634	0.00122215
5.184	2979.13	353.044	8.44634	252.423	0.310533	0.00123021
5.208	2941.96	347.844	8.45753	252.261	0.313042	0.00124095
5.232	2908.29	343.178	8.46724	252.12	0.315335	0.00125073
5.256	2871.71	338.756	8.47821	251.961	0.317617	0.00126058
5.28	2838.89	335.66	8.4893	251.8	0.312489	0.00124102
5.304	2803.55	330.915	8.4998	251.648	0.31492	0.00125143
5.328	2770.89	324.936	8.5147	251.432	0.318022	0.00126485
5.352	2736.85	320.617	8.52746	251.247	0.320425	0.00127534
5.376	2700.57	316.234	8.53849	251.087	0.322881	0.00128593
5.4	2667.55	311.681	8.55196	250.892	0.325504	0.00129738
5.424	2634.21	307.809	8.56977	250.635	0.327964	0.00130853
5.448	2602.13	302.489	8.58638	250.395	0.331144	0.00132248
5.472	2567.51	298.617	8.59841	250.222	0.333586	0.00133316
5.496	2536.34	295.064	8.60955	250.061	0.335868	0.00134314
5.52	2509.65	290.959	8.62132	249.891	0.331484	0.00132652
5.544	2480.02	286.592	8.632	249.737	0.334211	0.00133825
5.568	2449.35	283	8.6469	249.523	0.3367	0.00134938
5.592	2418.73	279.306	8.65807	249.362	0.339197	0.00136026
5.616	2390.51	276.082	8.66941	249.199	0.34147	0.00137027
5.64	2363.9	272.673	8.68072	249.036	0.343875	0.00138083
5.664	2336.69	269.327	8.69124	248.885	0.346274	0.0013913
5.688	2312.37	265.122	8.7022	248.727	0.349213	0.001404
5.712	2287.24	262.143	8.71209	248.585	0.351459	0.00141384
5.736	2260.45	259.143	8.72624	248.382	0.353889	0.00142478
5.76	2236.84	256.51	8.74274	248.145	0.349123	0.00140693
5.784	2211.84	253.039	8.75984	247.9	0.351952	0.00141974
5.808	2185.43	249.078	8.77746	247.647	0.355183	0.00143423
5.832	2158.63	246.314	8.78934	247.477	0.357543	0.00144475
5.856	2132.65	241.922	8.80216	247.294	0.361052	0.00146001
5.88	2109.86	238.667	8.81496	247.11	0.363844	0.0014724
5.904	2085.14	235.412	8.82717	246.936	0.366694	0.00148498
5.928	2059.92	232.235	8.83967	246.757	0.36956	0.00149767
5.952	2034.86	229.863	8.84707	246.651	0.371736	0.00150713
5.976	2012.98	227.039	8.85634	246.518	0.37431	0.00151839
6	1993.13	224.868	8.86	246.466	0.369071	0.00149745
6.024	1968.57	222.321	8.862	246.437	0.371263	0.00150652
6.048	1946.42	219.226	8.86184	246.44	0.373818	0.00151687
6.072	1922.81	217.132	8.86272	246.427	0.375694	0.00152457
6.096	1901.94	214.528	8.86781	246.354	0.378113	0.00153483
6.12	1878.58	212.132	8.87181	246.297	0.380397	0.00154446
6.144	1858.23	209.679	8.8758	246.24	0.382735	0.00155432
6.168	1835.79	207.302	8.88265	246.142	0.38517	0.00156483
6.192	1814.79	204.377	8.89	246.037	0.388114	0.00157746
6.216	1794.98	201.491	8.90511	245.821	0.391346	0.00159199
6.24	1776.55	199.382	8.92274	245.57	0.386799	0.00157511
6.264	1755.58	197.091	8.942	245.295	0.389729	0.00158882
6.288	1735.65	194.364	8.9601	245.036	0.393058	0.00160408
6.312	1716.45	191.582	8.97806	244.78	0.396498	0.00161981
6.336	1699.36	188.364	8.99393	244.554	0.40033	0.00163698
6.36	1679.98	185.436	9.00903	244.339	0.403972	0.00165333
6.384	1660.04	183.073	9.02666	244.088	0.407243	0.00166843
6.408	1641.75	181.182	9.05053	243.747	0.410329	0.00168342
6.432	1623	179.273	9.07385	243.415	0.413478	0.00169865
6.456	1605.55	177.327	9.09642	243.094	0.416681	0.00171407
6.48	1590.75	175.298	9.11539	242.824	0.412416	0.00169842
6.504	1572.63	172.737	9.13114	242.6	0.416069	0.00171504
6.528	1557.3	169.825	9.14817	242.357	0.420215	0.00173387
6.552	1538.98	167.526	9.16801	242.075	0.423934	0.00175125
6.576	1522.33	165.333	9.18689	241.806	0.427547	0.00176814
6.6	1504.23	162.965	9.20633	241.529	0.431495	0.00178651
6.624	1487.14	161.07	9.2271	241.234	0.435006	0.00180325
6.648	1471.21	158.965	9.24594	240.966	0.43874	0.00182076
6.672	1455.91	156.895	9.2575	240.801	0.442139	0.00183612
6.696	1439.67	155.456	9.26697	240.666	0.444698	0.00184778
6.72	1425.54	153.814	9.27475	240.556	0.439794	0.00182824
6.744	1410.75	151.644	9.28109	240.466	0.443167	0.00184295
6.768	1394.36	149.746	9.28985	240.341	0.446395	0.00185734
6.792	1378.19	148.237	9.29854	240.217	0.449142	0.00186974
6.816	1363.37	146.746	9.30417	240.137	0.451728	0.00188112
6.84	1348.78	145.136	9.31432	239.992	0.454757	0.00189488
6.864	1333.69	143.407	9.3255	239.833	0.458072	0.00190996
6.888	1321.44	141.644	9.33483	239.7	0.46135	0.0019247
6.912	1306.22	139.695	9.34359	239.576	0.464989	0.00194088
6.936	1290.69	138.169	9.35567	239.404	0.468245	0.00195588
6.96	1279.44	136.508	9.37148	239.178	0.464106	0.00194042
6.984	1265.48	134.754	9.38603	238.971	0.467901	0.00195798
7.008	1251.41	133.049	9.40294	238.73	0.471834	0.00197643
7.032	1238.28	131.623	9.4169	238.531	0.475202	0.0019922
7.056	1224.98	129.902	9.43057	238.336	0.479106	0.00201021
7.08	1211.31	127.984	9.44745	238.095	0.483631	0.00203125
7.104	1198.41	126.77	9.46206	237.887	0.486878	0.00204668
7.128	1184.82	124.902	9.47603	237.687	0.491312	0.00206705
7.152	1172.15	123.607	9.48756	237.523	0.49463	0.00208245
7.176	1159.43	122.033	9.50029	237.341	0.498598	0.00210077
7.2	1149.29	120.635	9.51228	237.17	0.494176	0.00208364
7.224	1137.81	119.349	9.5213	237.041	0.497413	0.00209843
7.248	1124.14	117.778	9.53366	236.864	0.501527	0.00211736
7.272	1113.17	116.778	9.54504	236.701	0.504478	0.00213129
7.296	1101.63	115.381	9.55994	236.488	0.50852	0.0021503
7.32	1090.52	114.048	9.57536	236.267	0.512541	0.00216932
7.344	1078.13	112.73	9.59012	236.056	0.516587	0.00218841
7.368	1065.79	111.143	9.60866	235.79	0.521564	0.00221198
7.392	1055.1	109.778	9.62369	235.575	0.52587	0.00223229
7.416	1044.3	108.254	9.64195	235.313	0.530869	0.00225601
7.44	1034.6	106.985	9.66068	235.044	0.527115	0.00224262
7.464	1023.34	105.615	9.67984	234.768	0.531986	0.002266
7.488	1012.25	103.954	9.69923	234.49	0.537666	0.00229292
7.512	1001.62	103.154	9.71638	234.243	0.541234	0.00231057
7.536	991.6	101.877	9.73565	233.965	0.546181	0.00233446
7.56	980.631	100.538	9.75203	233.729	0.551165	0.00235814
7.584	970.662	99.3231	9.76664	233.518	0.555763	0.00237996
7.608	961.462	98.3385	9.78117	233.308	0.559829	0.00239953
7.632	951.631	97.3231	9.79126	233.162	0.563659	0.00241746
7.656	942.723	95.9692	9.80421	232.974	0.5687	0.00244104
7.68	934.582	95.1045	9.81398	232.833	0.563583	0.00242054
7.704	924.582	94.0448	9.82087	232.733	0.567384	0.00243792
7.728	915.97	93	9.83071	232.59	0.571451	0.0024569
7.752	907.09	92.1045	9.84321	232.409	0.57543	0.00247593
7.776	897.448	91.0896	9.85713	232.207	0.579984	0.0024977
7.8	886.985	90.1343	9.86284	232.124	0.583651	0.00251439
7.824	877.478	89.2687	9.86945	232.028	0.587169	0.0025306
7.848	868.94	87.9403	9.87721	231.915	0.592238	0.00255369
7.872	860.194	86.7612	9.88533	231.797	0.596997	0.00257552
7.896	851.119	85.7015	9.89624	231.638	0.601778	0.00259792
7.92	843.609	85.3333	9.9044	231.519	0.595249	0.00257106
7.944	833.71	84.2174	9.91195	231.409	0.599945	0.00259257
7.968	824.957	83.1884	9.9193	231.302	0.604388	0.00261298
7.992	816.246	82.1304	9.92229	231.258	0.608533	0.0026314
8.016	807.594	81.0145	9.92243	231.256	0.612641	0.00264918
8.04	798.681	80.3333	9.92094	231.278	0.615142	0.00265975
8.064	790.594	79.6667	9.92015	231.29	0.617676	0.00267057
8.088	781.638	78.8696	9.91778	231.324	0.620564	0.00268266
8.112	774.435	78.1159	9.91686	231.338	0.623438	0.00269493
8.136	767.13	77.3623	9.91438	231.374	0.626184	0.00270637
8.16	760.225	76.6761	9.91279	231.397	0.619886	0.00267889
8.184	752.211	76.1549	9.91242	231.402	0.622071	0.00268827
8.208	743.845	75.338	9.91828	231.317	0.6261	0.00270668
8.232	736.014	74.2958	9.92478	231.222	0.631113	0.00272947
8.256	728.817	73.5352	9.93388	231.089	0.635395	0.00274957
8.28	721.662	72.5211	9.9427	230.96	0.640729	0.0027742
8.304	713.859	71.831	9.95265	230.815	0.645009	0.00279449
8.328	707.901	70.8732	9.9659	230.621	0.650792	0.00282191
8.352	701.831	70.3099	9.97901	230.429	0.65501	0.00284257
8.376	694.775	69.3803	9.98617	230.323	0.660175	0.0028663
8.4	688.986	68.8082	9.99957	230.127	0.655433	0.00284814
8.424	682.603	68.0959	10.0059	230.034	0.659611	0.00286745
8.448	675.808	67.4247	10.0146	229.906	0.664002	0.00288815
8.472	668.849	66.7671	10.0153	229.895	0.66737	0.00290293
8.496	662.178	66.3151	10.0162	229.882	0.669856	0.00291391
8.52	656.562	65.274	10.016	229.885	0.674929	0.00293595
8.544	649.397	64.8082	10.0163	229.882	0.677496	0.00294715
8.568	642.466	64.0274	10.0198	229.829	0.682041	0.0029676
8.592	635.356	63.5616	10.0258	229.741	0.685452	0.00298359
8.616	628.945	62.9452	10.0355	229.597	0.690121	0.00300579
8.64	624.08	62.3333	10.0484	229.408	0.685855	0.00298967
8.664	617.76	61.68	10.0544	229.319	0.690295	0.00301019
8.688	611.853	60.8	10.0674	229.127	0.696927	0.00304165
8.712	606.293	60.0933	10.0824	228.905	0.703069	0.00307145
8.736	599.92	59.2533	10.0986	228.665	0.710268	0.00310615
8.76	593.667	58.6267	10.1158	228.409	0.716613	0.00313741
8.784	588.2	58.0933	10.1307	228.187	0.72216	0.00316477
8.808	582.947	57.36	10.1452	227.971	0.728886	0.00319727
8.832	576.907	56.56	10.1553	227.822	0.735491	0.00322836
8.856	571.48	56.1733	10.1615	227.729	0.739093	0.00324549
8.88	567.143	55.7013	10.166	227.662	0.733206	0.00322059
8.904	561.922	55.2208	10.1704	227.595	0.737131	0.00323879
8.928	556.844	54.7273	10.1765	227.505	0.741432	0.00325898
8.952	551.104	54.1688	10.1773	227.492	0.745387	0.00327654
8.976	546.247	53.7792	10.175	227.527	0.747753	0.00328644
9	541.078	53.1818	10.1775	227.49	0.752294	0.00330694
9.024	536.532	52.7273	10.1783	227.478	0.755662	0.00332192
9.048	531.675	52.1688	10.1804	227.445	0.760003	0.00334148
9.072	526.052	51.7143	10.1823	227.418	0.76371	0.00335818
9.096	521	51.2078	10.183	227.407	0.767591	0.0033754
9.12	517.139	50.6962	10.1909	227.288	0.762882	0.00335645
9.144	511.481	50.1899	10.2022	227.118	0.7687	0.00338458
9.168	507.266	49.7342	10.2106	226.993	0.773639	0.0034082
9.192	502.785	49.3165	10.2165	226.905	0.777964	0.00342859
9.216	498.127	48.9241	10.2282	226.727	0.783234	0.00345452
9.24	493.684	48.1899	10.2403	226.546	0.791159	0.00349227
9.264	488.861	47.4684	10.2489	226.416	0.798569	0.003527
9.288	484.38	47.1772	10.2575	226.285	0.802766	0.00354758
9.312	479.835	46.7848	10.2658	226.16	0.807742	0.00357154
9.336	475.582	46.1646	10.2764	225.999	0.815062	0.00360649
9.36	472.062	45.8025	10.288	225.823	0.810366	0.0035885
9.384	467.37	45.3951	10.2949	225.718	0.815394	0.00361244
9.408	462.481	44.963	10.3	225.64	0.820368	0.00363574
9.432	458.235	44.5309	10.3083	225.515	0.825999	0.00366273
9.456	453.864	44.0123	10.3189	225.353	0.832959	0.00369624
9.48	449.667	43.6173	10.3266	225.236	0.838347	0.00372208
9.504	445.037	43.1235	10.3349	225.108	0.844872	0.00375318
9.528	440.926	42.5802	10.3455	224.946	0.852415	0.00378942
9.552	436.951	42.1852	10.3595	224.732	0.859474	0.00382444
9.576	433.346	41.7778	10.3753	224.488	0.867187	0.00386296
9.6	429.976	41.3976	10.3907	224.25	0.864075	0.00385318
9.624	425.952	40.9639	10.4111	223.935	0.87337	0.0039001
9.648	421.759	40.506	10.4298	223.645	0.882772	0.00394721
9.672	417.578	40	10.4446	223.414	0.891919	0.00399222
9.696	413.675	39.5301	10.4589	223.191	0.900754	0.0040358
9.72	409.675	39.0843	10.4724	222.981	0.909318	0.00407801
9.744	405.458	38.494	10.4842	222.794	0.919242	0.00412597
9.768	401.639	38.1566	10.4934	222.65	0.925824	0.00415821
9.792	397.53	37.7952	10.5036	222.49	0.933079	0.0041938
9.816	393.88	37.4578	10.5104	222.382	0.939204	0.00422338
9.84	390.247	37.0941	10.5161	222.291	0.934227	0.00420271
9.864	386.906	36.7882	10.5246	222.157	0.940534	0.00423364
9.888	383.412	36.5176	10.5309	222.058	0.945893	0.00425966
9.912	379.6	36.0706	10.5397	221.919	0.954227	0.00429989
9.936	376.424	35.8	10.5547	221.68	0.962367	0.00434125
9.96	372.941	35.4235	10.574	221.371	0.97339	0.0043971
9.984	369.129	34.9059	10.5942	221.047	0.986839	0.00446438
10.008	365.576	34.4824	10.6121	220.758	0.998719	0.00452405
10.032	362.424	34.1176	10.631	220.452	1.0104	0.00458329
10.056	359.329	33.6353	10.6487	220.164	1.02362	0.00464934
10.08	356.368	33.2184	10.6651	219.897	1.02383	0.00465597
10.104	352.885	32.8506	10.6783	219.681	1.03437	0.00470852
10.128	349.897	32.6552	10.6933	219.433	1.04329	0.00475446
10.152	346.678	32.3793	10.7069	219.208	1.05307	0.00480398
10.176	343.609	32.0575	10.7237	218.929	1.06504	0.00486479
10.2	340.759	31.8621	10.7384	218.685	1.07443	0.00491315
10.224	336.874	31.5632	10.7468	218.544	1.08318	0.00495633
10.248	333.448	31.046	10.7579	218.358	1.09667	0.00502238
10.272	330.092	30.7011	10.7773	218.03	1.11143	0.0050976
10.296	326.966	30.2529	10.7984	217.673	1.12919	0.00518757
10.32	324.337	29.9101	10.8251	217.216	1.13554	0.00522768
10.344	321.348	29.6966	10.8509	216.77	1.15281	0.00531811
10.368	318.36	29.3034	10.8838	216.197	1.17803	0.0054489
10.392	315.449	28.8652	10.906	215.806	1.19931	0.00555737
10.416	312.056	28.5281	10.9302	215.375	1.2209	0.00566869
10.44	308.843	28.0449	10.9519	214.986	1.24479	0.0057901
10.464	305.685	27.8427	10.9717	214.628	1.26259	0.00588269
10.488	302.899	27.4494	10.9903	214.288	1.28431	0.00599341
10.512	300.157	27.3258	11.0037	214.042	1.29711	0.00606004
10.536	297.742	27.0225	11.0136	213.858	1.31163	0.0061332
10.56	295.462	26.7473	11.0178	213.78	1.30684	0.00611301
10.584	292.692	26.4615	11.016	213.814	1.31241	0.00613808
10.608	289.824	26.2857	11.0201	213.738	1.32006	0.00617607
10.632	286.648	26.033	11.0237	213.671	1.32933	0.00622138
10.656	283.835	25.7143	11.0367	213.428	1.34771	0.00631456
10.68	281.505	25.6264	11.0455	213.262	1.3575	0.00636539
10.704	279.033	25.3846	11.0511	213.156	1.36861	0.0064207
10.728	276.44	25.0769	11.0522	213.136	1.37771	0.00646399
10.752	274.187	24.7582	11.058	213.025	1.39127	0.00653101
10.776	271.209	24.3736	11.0653	212.888	1.40828	0.00661512
10.8	268.925	24.1935	11.0712	212.775	1.40353	0.00659631
10.824	266.484	23.9892	11.0804	212.599	1.41785	0.00666915
10.848	263.839	23.828	11.0887	212.439	1.43055	0.00673396
10.872	261.032	23.5376	11.0977	212.264	1.44789	0.00682121
10.896	258.065	23.2688	11.1066	212.091	1.46494	0.00690712
10.92	255.731	23.0323	11.1103	212.019	1.47606	0.00696189
10.944	253.194	22.8387	11.1196	211.837	1.49193	0.0070428
10.968	250.634	22.6129	11.1281	211.67	1.50829	0.00712565
10.992	248.419	22.3333	11.1433	211.367	1.5342	0.00725843
11.016	245.667	21.9892	11.1599	211.036	1.56492	0.00741543
11.04	243.453	21.8	11.1747	210.735	1.57284	0.0074636
11.064	240.537	21.4421	11.1868	210.489	1.60075	0.00760492
11.088	238.063	21.2526	11.1994	210.23	1.62437	0.00772662
11.112	235.937	20.9895	11.2161	209.88	1.65731	0.00789645
11.136	233.863	20.7474	11.2265	209.661	1.68178	0.00802144
11.16	231.474	20.5684	11.2284	209.621	1.69198	0.0080716
11.184	229.095	20.3895	11.2356	209.468	1.71034	0.00816515
11.208	226.495	20.1789	11.2428	209.316	1.73036	0.00826672
11.232	224.768	19.9474	11.2516	209.125	1.75425	0.0083885
11.256	222.274	19.7789	11.2485	209.192	1.75688	0.00839838
11.28	220.165	19.6701	11.2473	209.218	1.74184	0.00832549
11.304	217.979	19.3814	11.2444	209.282	1.74968	0.00836042
11.328	215.68	19.0928	11.2371	209.436	1.75108	0.00836091
11.352	213.515	18.8969	11.2324	209.537	1.75276	0.00836493
11.376	211.309	18.8557	11.2246	209.702	1.74332	0.00831334
11.4	209.041	18.567	11.2204	209.791	1.75009	0.00834206
11.424	207.072	18.4536	11.2176	209.848	1.7516	0.00834698
11.448	204.608	18.3402	11.2113	209.982	1.74798	0.00832447
11.472	202.371	18.1134	11.2009	210.198	1.74367	0.00829539
11.496	200.474	17.9278	11.1903	210.418	1.73751	0.00825745
11.52	199.071	17.7879	11.1917	210.388	1.72855	0.00821599
11.544	197.323	17.6768	11.1873	210.478	1.72811	0.00821042
11.568	195.313	17.4747	11.1845	210.535	1.73411	0.00823667
11.592	193.374	17.2929	11.1936	210.348	1.75593	0.00834776
11.616	191.333	17.1111	11.2046	210.122	1.7811	0.00847651
11.64	189.646	16.899	11.2125	209.957	1.80387	0.00859161
11.664	187.98	16.7677	11.2251	209.691	1.83072	0.00873057
11.688	185.828	16.6061	11.2353	209.475	1.85629	0.00886163
11.712	183.97	16.3434	11.2436	209.297	1.88471	0.00900492
11.736	182.051	16.1212	11.2476	209.213	1.90425	0.00910199
11.76	180.644	16.0297	11.248	209.204	1.89149	0.00904134
11.784	178.822	15.7822	11.2465	209.235	1.90339	0.00909694
11.808	177.05	15.703	11.2478	209.208	1.91074	0.0091332
11.832	175.495	15.5743	11.2597	208.95	1.94009	0.00928495
11.856	173.832	15.4851	11.2653	208.829	1.95623	0.00936759
11.88	172.109	15.3861	11.2625	208.889	1.9577	0.00937196
11.904	170.545	15.2178	11.2618	208.905	1.96694	0.00941547
11.928	168.812	15.0396	11.2549	209.054	1.96572	0.00940295
11.952	167.584	14.802	11.2565	209.021	1.9836	0.00948997
11.976	166.287	14.6931	11.257	209.008	1.99201	0.00953076
12	164.893	14.6408	11.2629	208.88	1.98754	0.00951522
12.024	163.34	14.5049	11.2711	208.702	2.01254	0.00964314
12.048	161.835	14.3786	11.2778	208.554	2.03474	0.0097564
12.072	160.388	14.2039	11.2904	208.274	2.0731	0.00995373
12.096	159.155	14.1165	11.2992	208.078	2.09846	0.0100849
12.12	157.631	13.9612	11.3109	207.813	2.1364	0.0102804
12.144	156.107	13.8447	11.3215	207.569	2.17068	0.0104576
12.168	154.864	13.7282	11.3329	207.305	2.20815	0.0106517
12.192	153.573	13.5146	11.3435	207.058	2.25253	0.0108788
12.216	152.087	13.3204	11.3492	206.922	2.28409	0.0110384
12.24	150.981	13.1905	11.3504	206.895	2.27626	0.011002
12.264	149.562	13.1429	11.3492	206.924	2.27756	0.0110068
12.288	148.133	13.0095	11.3501	206.901	2.29189	0.0110773
12.312	146.638	12.8952	11.35	206.904	2.30174	0.0111247
12.336	145.343	12.8	11.3438	207.051	2.2933	0.0110761
12.36	143.829	12.7429	11.3374	207.201	2.28179	0.0110125
12.384	142.524	12.6381	11.3202	207.599	2.24696	0.0108235
12.408	141.457	12.5333	11.3129	207.768	2.23809	0.0107721
12.432	140.076	12.419	11.3049	207.948	2.22931	0.0107205
12.456	138.771	12.2857	11.2908	208.266	2.20847	0.0106041
12.48	137.972	12.1589	11.2794	208.518	2.17371	0.0104245
12.504	136.243	12.1028	11.2709	208.705	2.16138	0.0103562
12.528	135.056	11.9533	11.2585	208.976	2.14887	0.0102828
12.552	133.794	11.8411	11.2431	209.309	2.12844	0.0101689
12.576	132.495	11.8131	11.229	209.609	2.10505	0.0100428
12.6	131.402	11.7009	11.2121	209.965	2.08443	0.00992751
12.624	130.14	11.6262	11.1852	210.522	2.04588	0.0097181
12.648	128.794	11.5607	11.1618	210.998	2.01523	0.00955095
12.672	127.477	11.4673	11.1324	211.585	1.98041	0.00935986
12.696	126.215	11.3458	11.0992	212.236	1.94582	0.00916816
12.72	125.358	11.2844	11.0762	212.678	1.90447	0.0089547
12.744	124.101	11.2294	11.0456	213.261	1.87336	0.00878437
12.768	123.018	11.1835	11.0286	213.58	1.85858	0.00870204
12.792	121.835	11.1009	11.0149	213.834	1.85087	0.00865564
12.816	121.073	11.0734	10.9975	214.157	1.83516	0.00856926
12.84	120.202	10.9633	10.9729	214.605	1.81948	0.00847828
12.864	119.119	10.9358	10.9498	215.025	1.80009	0.00837155
12.888	118.046	10.7248	10.93	215.379	1.79865	0.00835109
12.912	116.862	10.633	10.9194	215.569	1.79691	0.00833568
12.936	115.358	10.5596	10.9161	215.627	1.8007	0.008351
12.96	114.414	10.5405	10.919	215.576	1.789	0.0082987
12.984	113.333	10.4414	10.9246	215.476	1.80249	0.00836515
13.008	112.441	10.3784	10.933	215.326	1.81578	0.00843272
13.032	111.378	10.2342	10.9299	215.382	1.82528	0.0084746
13.056	110.577	10.1081	10.917	215.611	1.8245	0.00846197
13.08	109.649	10	10.913	215.683	1.83049	0.00848694
13.104	108.568	9.84685	10.9119	215.701	1.84332	0.00854571
13.128	107.676	9.8018	10.9148	215.65	1.85048	0.00858096
13.152	106.856	9.73874	10.9218	215.526	1.86293	0.00864364
13.176	105.658	9.73874	10.9241	215.485	1.86598	0.00865943
13.2	104.947	9.64602	10.9171	215.609	1.85164	0.00858795
13.224	104.212	9.61062	10.9081	215.769	1.84711	0.00856059
13.248	103.274	9.48673	10.8957	215.988	1.84767	0.00855449
13.272	102.345	9.38053	10.8847	216.182	1.84822	0.00854938
13.296	101.265	9.28319	10.8705	216.431	1.8456	0.00852745
13.32	100.363	9.23894	10.8677	216.479	1.84797	0.00853647
13.344	99.5221	9.15929	10.861	216.596	1.85028	0.00854252
13.368	98.7699	9.0708	10.8553	216.695	1.85429	0.00855715
13.392	97.6814	8.99115	10.847	216.839	1.85573	0.00855808
13.416	96.6726	8.93805	10.8363	217.023	1.8528	0.00853733
13.44	95.9565	8.86957	10.82	217.304	1.83056	0.00842398
13.464	95	8.7913	10.8099	217.477	1.83081	0.0084184
13.488	94.0261	8.72174	10.8054	217.554	1.8348	0.00843378
13.512	93.4	8.65217	10.7907	217.803	1.83077	0.00840565
13.536	92.6348	8.58261	10.7845	217.909	1.83343	0.0084137
13.56	91.8	8.55652	10.7832	217.931	1.83573	0.00842344
13.584	91.4348	8.50435	10.7849	217.903	1.84245	0.0084554
13.608	90.7652	8.3913	10.7908	217.802	1.8589	0.00853484
13.632	89.7391	8.36522	10.797	217.696	1.8673	0.00857754
13.656	88.8957	8.23478	10.7972	217.694	1.88164	0.00864351
13.68	88.0769	8.15385	10.7932	217.762	1.87153	0.0085944
13.704	87.5299	8.07692	10.801	217.628	1.88637	0.00866786
13.728	86.6923	7.97436	10.8068	217.53	1.90285	0.00874753
13.752	86.0513	7.93162	10.807	217.525	1.90832	0.00877287
13.776	85.265	7.89744	10.8166	217.363	1.92064	0.00883609
13.8	84.6154	7.87179	10.8291	217.148	1.93457	0.00890899
13.824	84.0256	7.76923	10.8367	217.016	1.95334	0.00900089
13.848	83.4701	7.71795	10.8459	216.857	1.96786	0.00907443
13.872	82.8547	7.65812	10.8523	216.747	1.98114	0.00914034
13.896	82.3077	7.59829	10.8758	216.337	2.01041	0.00929297
13.92	81.8571	7.48739	10.9166	215.619	2.04702	0.00949372
13.944	81.0504	7.44538	10.9618	214.808	2.10112	0.00978139
13.968	80.521	7.36134	11.0065	213.99	2.16514	0.010118
13.992	79.8992	7.30252	11.0569	213.046	2.23978	0.0105131
14.016	79.3445	7.14286	11.1009	212.202	2.32833	0.0109722
14.04	78.7143	7	11.1465	211.305	2.42702	0.0114859
14.064	77.9664	6.93277	11.1843	210.539	2.51015	0.0119225
14.088	77.2521	6.83193	11.2175	209.851	2.59797	0.01238
14.112	76.5294	6.73109	11.2397	209.381	2.66816	0.0127431
14.136	75.7983	6.70588	11.2652	208.831	2.73774	0.0131099
14.16	75.3058	6.64463	11.2822	208.457	2.77285	0.0133018
14.184	74.6612	6.57851	11.2903	208.277	2.80954	0.0134895
14.208	74.1074	6.58678	11.3008	208.042	2.83936	0.013648
14.232	73.3802	6.56198	11.3042	207.965	2.85577	0.013732
14.256	72.8017	6.4876	11.2983	208.098	2.85383	0.0137138
14.28	72.157	6.38843	11.3	208.06	2.8802	0.0138431
14.304	71.4711	6.30579	11.2993	208.076	2.89651	0.0139205
14.328	70.9835	6.24793	11.2924	208.231	2.88885	0.0138733
14.352	70.3223	6.19835	11.2913	208.254	2.89754	0.0139135
14.376	69.6942	6.16529	11.3012	208.032	2.93564	0.0141115
14.4	69.2195	6.11382	11.3088	207.86	2.9474	0.0141797
14.424	68.6911	6.06504	11.312	207.788	2.96925	0.0142898
14.448	68.0976	6.04065	11.3152	207.715	2.98627	0.0143768
14.472	67.439	6	11.3253	207.483	3.0304	0.0146055
14.496	66.8293	5.9187	11.3406	207.125	3.10506	0.0149912
14.52	66.2683	5.86179	11.3583	206.706	3.18732	0.0154196
14.544	65.6748	5.79675	11.3727	206.359	3.26395	0.0158168
14.568	65.2602	5.73984	11.3843	206.073	3.3308	0.0161632
14.592	64.8211	5.65041	11.408	205.478	3.47006	0.0168877
14.616	64.4065	5.5935	11.4311	204.879	3.61333	0.0176365
14.64	64.024	5.568	11.4379	204.7	3.63248	0.0177454
14.664	63.368	5.52	11.4399	204.646	3.66073	0.0178881
14.688	62.768	5.48	11.4405	204.63	3.67788	0.0179733
14.712	62.376	5.408	11.4324	204.846	3.65218	0.0178289
14.736	61.792	5.376	11.4137	205.332	3.55879	0.0173319
14.76	61.192	5.384	11.3953	205.799	3.46382	0.0168311
14.784	60.624	5.352	11.3873	206	3.43599	0.0166795
14.808	60.216	5.312	11.3787	206.212	3.40904	0.0165317
14.832	59.56	5.28	11.3623	206.611	3.3483	0.0162059
14.856	59.04	5.24	11.3404	207.131	3.27281	0.0158007
14.88	58.7874	5.19685	11.3231	207.533	3.19584	0.0153992
14.904	58.3071	5.11024	11.3118	207.792	3.18189	0.0153129
14.928	57.7323	5.07087	11.3143	207.735	3.20319	0.0154196
14.952	57.0787	5.06299	11.321	207.582	3.23067	0.0155634
14.976	56.7323	5.02362	11.3296	207.382	3.27479	0.0157911
15	56.252	4.97638	11.3377	207.194	3.32094	0.0160282
15.024	55.7638	4.96063	11.3438	207.051	3.3509	0.016184
15.048	55.4331	4.88189	11.3365	207.222	3.34757	0.0161545
15.072	55.0709	4.82677	11.3306	207.36	3.34314	0.0161224
15.096	54.6378	4.80315	11.3395	207.151	3.38671	0.016349
	54.4031	4.7907	11.3429
	53.9845	4.74419	11.3437
	53.5736	4.72868	11.3407
	53.1783	4.69767	11.3263
	52.8062	4.64341	11.3081
	52.4341	4.62791	11.2935
	51.9147	4.58915	11.2818
	51.3488	4.5814	11.2679
	50.7752	4.53488	11.257
	50.5736	4.51163	11.2531
	50.1679	4.47328	11.2438
	49.7939	4.43511	11.2391
	49.3588	4.39695	11.2325
	48.8626	4.35878	11.2402
	48.5496	4.30534	11.2561
	48.0916	4.26718	11.2756
	47.8702	4.24427	11.2978
	47.5344	4.22901	11.3177
	47.1527	4.17557	11.3435
	46.7863	4.1145	11.3713
	46.5564	4.07519	11.3905
	46.1805	4.03008	11.411
	45.8722	4.00752	11.4396
	45.5188	3.95489	11.47
	45.1955	3.92481	11.4965
	44.7444	3.89474	11.5127
	44.3383	3.85714	11.5275
	44.0226	3.79699	11.5557
	43.6842	3.77444	11.5878
	43.3759	3.74436	11.6048
	43.1185	3.73333	11.6201
	43	3.71111	11.6404
	42.7185	3.62963	11.6507
	42.3926	3.59259	11.6532
	42.1037	3.6	11.6572
	41.7185	3.57037	11.6673
	41.4667	3.54074	11.6747
	41.0148	3.53333	11.6883
	40.7185	3.5037	11.696
	40.363	3.47407	11.6842
	40.1241	3.43066	11.6855
	39.7299	3.41606	11.6898
	39.4088	3.35766	11.692
	39.1095	3.29927	11.6994
	38.7591	3.32117	11.706
	38.4599	3.28467	11.7072
	38.1095	3.24818	11.7103
	37.8613	3.22628	11.721
	37.6277	3.21898	11.7205
	37.3869	3.19708	11.7136
	37.2374	3.20144	11.7272
	36.964	3.15108	11.7476
	36.7626	3.1295	11.7523
	36.4604	3.10791	11.7529
	36.2662	3.07914	11.7586
	35.9712	3.04317	11.7594
	35.7986	3	11.7716
	35.5252	3.01439	11.7862
	35.3094	3.00719	11.8081
	35.0863	2.98561	11.8336
	34.8582	2.97872	11.8406
	34.5461	2.93617	11.8399
	34.2411	2.87943	11.8231
	34.1773	2.85106	11.8174
	33.9078	2.8227	11.8166
	33.6312	2.83688	11.8192
	33.4255	2.82979	11.8211
	33.1631	2.8227	11.8095
	32.922	2.80851	11.7909
	32.7872	2.79433	11.7707
	32.6224	2.76923	11.7588
	32.3007	2.75524	11.7678
	32.0629	2.75524	11.7778
	31.8741	2.72727	11.7903
	31.6783	2.69231	11.8022
	31.4056	2.64336	11.8091
	31.1818	2.60839	11.8123
	31.014	2.6014	11.8234
	30.6713	2.58042	11.85
	30.4196	2.56643	11.8771
