# Supplementary material for: Tropospheric temperature measurements with the pure rotational Raman lidar technique using nonlinear calibration functions
Source: Copernicus journal article supplement (doi:10.5194/amt-10-315-2017), 2017-01-27
Supplement: Supplementary file 45 [file 02.10.2014. Temperature profile retrieved using Eq. (20).xlsx]

## Sheet: Лист1
z, km
Altitude	Smoothed signals	Smoothed signals	Smoothed ratio
0.048	573	65.5	8.59143	251.586	3.67431	0.0146046	A4	0.075	282.75	0.143	286.15	0.83	277.15
0.072	743	82	8.45197	253.708	2.57615	0.010154	-0.0317474	0.182	283.75	0.188	285.55	1.51	274.35
0.096	995.333	113	8.38058	254.775	2.15005	0.008439		0.199	283.55	0.484	282.75	3.05	266.15	3.048	0.222412
0.12	1177.67	135	8.307	255.859	1.92059	0.00750643	B4	0.24	283.25	0.737	280.25	5.61	250.65	5.616	0.269823
0.144	1215.67	150.333	8.2572	256.583	1.79536	0.0069972	0.00934829	0.647	280.35	0.835	279.35	7.21	238.15	7.2	1.2255
0.168	1204.67	148.333	8.21704	257.16	1.78015	0.00692234		0.821	277.75	1.517	273.55	9.14	224.15	9.144	1.79634
0.192	1167.67	153.333	8.11769	258.562	1.68827	0.00652946	C4	1.186	273.95	1.555	273.25	12	210.65	12	0.557064
0.216	1124.33	142.667	8.00646	260.082	1.66074	0.00638544	0.0335868	1.341	274.55	2.11	268.65
0.24	1085.2	140.6	7.94315	260.921	1.25672	0.00481648		1.5	275.35	2.702	268.65
0.264	1046.4	134	7.84723	262.152	1.21995	0.0046536		1.548	275.15	3.053	266.65
0.288	1008.2	129	7.81317	262.577	1.2182	0.00463939		1.605	274.75	3.943	262.05
0.312	976.8	127.6	7.78997	262.862	1.20878	0.00459852		2.242	269.65	4.143	262.05
0.336	954.6	121.8	7.79515	262.798	1.23958	0.00471685		2.449	270.05	4.257	262.05
0.36	928	114.4	7.78307	262.946	1.2669	0.00481811		2.661	268.55	5.195	255.85
0.384	901.8	117.6	7.76429	263.174	1.23845	0.00470583		2.879	267.05	5.59	253.25
0.408	888.4	115.2	7.73749	263.495	1.22885	0.00466366		3.046	265.85	5.62	252.65
0.432	870	110.6	7.70801	263.843	1.2276	0.00465276		3.192	264.45	6.572	244.15
0.456	842.4	109.8	7.69118	264.039	1.21919	0.00461746		3.397	264.45	7.03	240.05
0.48	834.571	107.714	7.66519	264.337	1.02021	0.00385951		3.502	263.55	7.22	239.65
0.504	819.857	109.143	7.60088	265.056	0.965866	0.003644		3.763	261.45	8.3	232.65
0.528	801.857	106.714	7.59068	265.167	0.968663	0.00365302		3.983	262.45	8.402	232.05
0.552	793	105.857	7.59838	265.084	0.978909	0.00369283		4.168	261.15	9.18	225.45
0.576	785.429	105.143	7.5932	265.14	0.978237	0.00368951		5.002	255.25	10.36	215.85
0.6	784.286	103.857	7.61335	264.919	0.999823	0.00377407		5.497	251.45	10.827	211.45
0.624	774.286	104.571	7.61857	264.861	1.00171	0.003782		5.6	250.65	11.324	210.05
0.648	768.571	101.714	7.63633	264.664	1.02866	0.00388666		5.718	249.65	11.382	209.85
0.672	771.857	99	7.64876	264.524	1.05073	0.00397217		5.763	249.25	11.74	210.45
0.696	777.571	99.5714	7.66158	264.378	1.05778	0.00400102		5.99	248.05	12.161	211.55
0.72	768.333	97.3333	7.6564	264.437	0.939312	0.00355211		6.036	247.65	13.54	215.25
0.744	771	98.7778	7.63705	264.656	0.919364	0.00347381		6.903	240.35	13.753	216.05
0.768	775	100.556	7.63752	264.65	0.912194	0.00344679		7.2	237.85	15.715	214.55
0.792	781.222	102.111	7.62574	264.782	0.897344	0.00338899		8.398	227.85	16.08	214.25
0.816	798	104.556	7.60098	265.055	0.869563	0.00328069		9.12	222.85
0.84	819.556	110.556	7.59542	265.116	0.843258	0.00318071		10.149	215.05
0.864	852.111	116.111	7.58929	265.182	0.819196	0.00308918		10.3	214.45
0.888	892.444	120.444	7.60136	265.051	0.811843	0.00306297		11.123	209.25
0.912	955.556	128.667	7.6145	264.906	0.793708	0.00299618		11.179	209.05
0.936	1040	138.222	7.64123	264.609	0.781352	0.00295286		11.589	209.35
0.96	1185.45	153	7.67286	264.25	0.686742	0.00259884		11.68	209.45
0.984	1307.73	167.091	7.72722	263.617	0.682567	0.00258924		11.899	209.05
1.008	1458.45	183.727	7.80198	262.714	0.682871	0.00259929		12.061	210.15
1.032	1631.73	207.818	7.87218	261.837	0.669827	0.00255819		12.469	212.75
1.056	1817.18	228.727	7.94085	260.951	0.662412	0.00253845		12.576	213.45
1.08	2019.73	253.091	7.99554	260.228	0.647253	0.00248725		13.47	214.25
1.104	2254	281.364	8.02276	259.863	0.621859	0.00239303		14.322	217.05
1.128	2522.55	309.091	8.04175	259.606	0.598017	0.00230356		15.201	216.75
1.152	2812.27	343.727	8.04945	259.501	0.569034	0.0021928		16.03	216.45
1.176	3118.09	381.091	8.06217	259.328	0.543569	0.00209607
1.2	3465.31	426.462	8.06852	259.241	0.474203	0.0018292
1.224	3794.08	471.462	8.06644	259.269	0.450822	0.00173882
1.248	4127.69	513.692	8.06082	259.346	0.430831	0.00166122
1.272	4477.38	558.077	8.03633	259.679	0.408739	0.00157401
1.296	4813.38	602.308	8.00463	260.107	0.387632	0.00149028
1.32	5162.62	644.154	7.97032	260.563	0.368456	0.00141408
1.344	5532.23	695.231	7.93733	260.997	0.348824	0.00133651
1.368	5917.23	744.385	7.90261	261.447	0.330909	0.00126568
1.392	6292.23	797.308	7.8627	261.957	0.312779	0.00119401
1.416	6655.62	849.692	7.81939	262.5	0.295451	0.00112553
1.44	6988.73	895.467	7.77674	263.023	0.260946	0.000992104
1.464	7337.4	945.2	7.72794	263.608	0.245995	0.000933183
1.488	7669.73	1000.53	7.67931	264.176	0.231201	0.000875178
1.512	8015.13	1055.13	7.62836	264.753	0.216764	0.000818743
1.536	8346.33	1106	7.57969	265.286	0.203629	0.000767583
1.56	8686.87	1154.8	7.5365	265.745	0.192018	0.000722566
1.584	9007.73	1204.6	7.49374	266.184	0.180812	0.000679274
1.608	9319.67	1255.6	7.45458	266.574	0.170506	0.00063962
1.632	9642.33	1305	7.42306	266.877	0.161914	0.000606699
1.656	9957.27	1353.53	7.39608	267.13	0.154428	0.000578099
1.68	10249.9	1393.06	7.3723	267.348	0.139178	0.000520588
1.704	10534.1	1436.29	7.34898	267.556	0.133368	0.000498468
1.728	10808.7	1474.18	7.32743	267.744	0.128205	0.000478832
1.752	11076.6	1513.41	7.31191	267.877	0.124074	0.000463175
1.776	11340.5	1553.59	7.29939	267.982	0.120494	0.000449636
1.8	11591.8	1591.24	7.28651	268.089	0.117044	0.000436588
1.824	11843.9	1630.06	7.27253	268.203	0.113467	0.000423063
1.848	12066.1	1666.41	7.26044	268.299	0.110357	0.000411321
1.872	12279.4	1693.29	7.24654	268.409	0.107297	0.00039975
1.896	12463.6	1718.88	7.23295	268.514	0.104374	0.00038871
1.92	12597.4	1746.05	7.22249	268.594	0.0964443	0.000359071
1.944	12763.7	1771.74	7.21348	268.662	0.0944241	0.000351461
1.968	12898.6	1791.16	7.20491	268.725	0.0926539	0.00034479
1.992	13030.4	1815.05	7.19718	268.782	0.0909249	0.000338285
2.016	13146.2	1833.63	7.18733	268.853	0.0890246	0.000331127
2.04	13264.1	1846.21	7.17884	268.914	0.0874628	0.000325245
2.064	13352.4	1858.21	7.17255	268.958	0.0862554	0.000320702
2.088	13425.9	1872.05	7.16648	269.001	0.0850533	0.000316183
2.112	13469.7	1882.37	7.15994	269.046	0.0838703	0.000311733
2.136	13524.2	1893.26	7.15648	269.07	0.083129	0.00030895
2.16	13515.3	1888.24	7.1538	269.088	0.0787915	0.00029281
2.184	13544.4	1895.48	7.15064	269.109	0.0782063	0.000290612
2.208	13546.8	1898.05	7.14904	269.12	0.0779339	0.000289588
2.232	13537.6	1898.86	7.14829	269.125	0.0778177	0.000289151
2.256	13535	1895.38	7.15136	269.104	0.0783125	0.000291011
2.28	13516.4	1893.05	7.15745	269.063	0.0792145	0.000294409
2.304	13486.1	1886.24	7.16354	269.021	0.0802022	0.000298126
2.328	13454.2	1877	7.17178	268.963	0.0815383	0.000303158
2.352	13417	1872.95	7.1809	268.899	0.0828986	0.000308289
2.376	13357.1	1857.86	7.19185	268.821	0.0847381	0.000315222
2.4	13271.4	1840.61	7.20453	268.728	0.0830158	0.000308921
2.424	13195.2	1826.43	7.21535	268.648	0.0847592	0.000315503
2.448	13115.4	1812.43	7.22483	268.576	0.08633	0.000321436
2.472	13040.4	1801.78	7.2336	268.509	0.0877407	0.00032677
2.496	12946.2	1785.74	7.24314	268.436	0.0893816	0.000332972
2.52	12865	1767.04	7.25056	268.378	0.0908082	0.00033836
2.544	12755.1	1757.13	7.25733	268.324	0.0919723	0.000342766
2.568	12648.6	1743.65	7.26287	268.28	0.0930606	0.000346879
2.592	12533.1	1725.26	7.26809	268.238	0.0942373	0.000351319
2.616	12423.7	1709.26	7.27497	268.183	0.0955838	0.000356413
2.64	12276	1688.32	7.2824	268.122	0.0931907	0.000347568
2.664	12140.9	1666.6	7.28902	268.068	0.0946296	0.000353006
2.688	12015.2	1649.2	7.29726	268	0.0961795	0.000358879
2.712	11874.9	1628.08	7.3064	267.923	0.0979635	0.00036564
2.736	11733.8	1604.48	7.31615	267.841	0.0999143	0.000373036
2.76	11600.5	1582.28	7.32757	267.743	0.102062	0.000381195
2.784	11458	1558.2	7.33837	267.649	0.104217	0.000389378
2.808	11312.2	1539.12	7.3513	267.536	0.106524	0.000398168
2.832	11159	1517.28	7.36373	267.425	0.10888	0.00040714
2.856	11014.4	1494.16	7.37587	267.316	0.111264	0.000416227
2.88	10872.8	1470.48	7.3875	267.21	0.109343	0.000409202
2.904	10724.4	1451.22	7.39907	267.103	0.111501	0.000417444
2.928	10578.1	1424.26	7.40919	267.008	0.113775	0.000426109
2.952	10440.3	1406.63	7.42082	266.899	0.115934	0.000434375
2.976	10296.6	1386.3	7.43357	266.777	0.118359	0.000443664
3	10153	1364.44	7.44676	266.65	0.120929	0.000453514
3.024	10016.4	1342.93	7.45958	266.525	0.12347	0.000463259
3.048	9875.26	1322.93	7.47499	266.372	0.126308	0.000474179
3.072	9736.26	1302.04	7.48991	266.223	0.129156	0.000485142
3.096	9599.19	1280.78	7.50701	266.05	0.132325	0.000497368
3.12	9481.24	1261.34	7.52657	265.848	0.13097	0.000492648
3.144	9340.55	1239.62	7.54798	265.625	0.134636	0.000506865
3.168	9204.55	1217.62	7.56911	265.4	0.138321	0.000521179
3.192	9076.72	1195.69	7.59172	265.156	0.142213	0.000536337
3.216	8948.07	1175.79	7.61521	264.899	0.146141	0.000551686
3.24	8828.24	1155.14	7.63886	264.635	0.15016	0.000567424
3.264	8710.79	1134.72	7.66236	264.37	0.154186	0.000583223
3.288	8587.03	1116.48	7.68479	264.112	0.158005	0.000598249
3.312	8472.28	1098.38	7.70588	263.867	0.161689	0.000612766
3.336	8351.72	1079.59	7.72287	263.668	0.165	0.000625787
3.36	8244.1	1063.06	7.73931	263.473	0.162609	0.000617176
3.384	8131.87	1045.87	7.75387	263.299	0.165514	0.000628617
3.408	8021	1030.74	7.76579	263.156	0.168023	0.000638492
3.432	7913.13	1015.61	7.77521	263.042	0.170291	0.000647394
3.456	7807.42	1003.77	7.78347	262.941	0.172216	0.000654959
3.48	7694.32	987.581	7.79114	262.848	0.174449	0.00066369
3.504	7588.29	972.516	7.79805	262.763	0.176543	0.000671874
3.528	7481.48	958.226	7.80264	262.706	0.178356	0.000678918
3.552	7372.9	945.871	7.80927	262.625	0.180271	0.000686421
3.576	7267.29	931.194	7.81525	262.551	0.182341	0.000694497
3.6	7176.76	917.697	7.82452	262.436	0.179007	0.000682099
3.624	7082.39	904.394	7.83501	262.305	0.181442	0.000691721
3.648	6981.64	892.152	7.84654	262.161	0.183939	0.000701628
3.672	6884.58	876.485	7.85821	262.014	0.186802	0.000712949
3.696	6788.21	863.939	7.87311	261.825	0.189765	0.000724779
3.72	6694.94	849.606	7.88771	261.639	0.192907	0.000737301
3.744	6602.36	835.061	7.9002	261.478	0.195893	0.000749174
3.768	6515.45	821.667	7.91245	261.32	0.198774	0.000760654
3.792	6420.21	809	7.92397	261.171	0.20156	0.000771756
3.816	6333.27	795.758	7.93295	261.054	0.204169	0.000782092
3.84	6251.94	784.943	7.94155	260.942	0.200506	0.000768393
3.864	6160	774.086	7.94764	260.862	0.202559	0.000776497
3.888	6071.34	762.171	7.95139	260.813	0.204522	0.000784169
3.912	5988.37	753.029	7.95346	260.786	0.205999	0.000789915
3.936	5906.91	742.686	7.95487	260.767	0.207577	0.000796024
3.96	5823.94	732.4	7.95549	260.759	0.209099	0.000801885
3.984	5741.86	722.514	7.95536	260.761	0.210518	0.000807321
4.008	5657.2	711.8	7.95689	260.741	0.212261	0.000814071
4.032	5579.34	701.6	7.95617	260.75	0.213713	0.000819609
4.056	5501.97	691.943	7.95628	260.749	0.215213	0.000825366
4.08	5432.78	682.027	7.95673	260.743	0.21086	0.000808689
4.104	5355.3	672.486	7.95664	260.744	0.212343	0.000814374
4.128	5287.14	663	7.95821	260.723	0.214013	0.000820842
4.152	5212.03	654.946	7.96395	260.648	0.215982	0.000828636
4.176	5140.84	646.351	7.97116	260.552	0.218216	0.000837512
4.2	5069.51	637	7.97678	260.478	0.220426	0.000846238
4.224	4998.05	628.622	7.98297	260.396	0.22259	0.000854814
4.248	4924.11	618.27	7.98933	260.311	0.225133	0.00086486
4.272	4858.49	606.486	7.99731	260.205	0.228129	0.00087673
4.296	4796.84	597.243	8.00726	260.071	0.23097	0.000888102
4.32	4737.69	591.231	8.0202	259.897	0.227549	0.000875534
4.344	4678.33	582.333	8.03196	259.739	0.230528	0.000887537
4.368	4616.08	574.615	8.04528	259.558	0.233518	0.000899675
4.392	4556.69	565.179	8.05919	259.369	0.236921	0.000913452
4.416	4498.9	557.667	8.06854	259.241	0.239515	0.000923912
4.44	4439.31	548.333	8.07763	259.116	0.242484	0.000935813
4.464	4380.46	541.615	8.08983	258.948	0.245318	0.000947364
4.488	4318.38	533.308	8.09798	258.836	0.248089	0.000958482
4.512	4264.74	525.385	8.10577	258.728	0.250765	0.000969223
4.536	4205.62	518.333	8.11186	258.643	0.253133	0.000978695
4.56	4154.27	510.878	8.11885	258.546	0.24939	0.000964586
4.584	4099.34	503.146	8.12319	258.486	0.251736	0.000973889
4.608	4040.54	497.39	8.12924	258.401	0.253877	0.00098249
4.632	3983.66	490.659	8.13433	258.33	0.256166	0.000991621
4.656	3929.83	483.415	8.14038	258.246	0.258711	0.0010018
4.68	3880.63	476.488	8.14835	258.134	0.261419	0.00101272
4.704	3832.37	470.585	8.15564	258.031	0.263841	0.00102251
4.728	3781.41	463.732	8.16324	257.924	0.266587	0.00103359
4.752	3734.41	458.024	8.17689	257.732	0.269718	0.00104651
4.776	3686.56	450.463	8.19086	257.534	0.273424	0.0010617
4.8	3644.09	444.326	8.20687	257.306	0.270475	0.00105118
4.824	3599.26	438.302	8.22454	257.053	0.27415	0.00106651
4.848	3549.88	431.279	8.24327	256.784	0.278281	0.00108372
4.872	3506.44	423.814	8.2635	256.492	0.28273	0.00110229
4.896	3459.53	418.186	8.2852	256.177	0.286846	0.00111972
4.92	3417.79	411.512	8.30374	255.907	0.290983	0.00113707
4.944	3372.84	404.488	8.32219	255.637	0.295299	0.00115515
4.968	3330.23	398.837	8.34197	255.346	0.299345	0.00117231
4.992	3288.21	392.535	8.35907	255.094	0.303389	0.00118932
5.016	3246.74	386.884	8.3739	254.874	0.307037	0.00120466
5.04	3208.44	382.511	8.38933	254.645	0.303341	0.00119123
5.064	3169.38	377.111	8.40142	254.465	0.306634	0.00120501
5.088	3131.82	371.533	8.41225	254.304	0.309916	0.00121868
5.112	3090	367.022	8.42359	254.134	0.312919	0.00123132
5.136	3050.69	361.6	8.43271	253.997	0.316094	0.00124448
5.16	3014.16	357.022	8.43868	253.908	0.318673	0.00125507
5.184	2979.13	353.044	8.44634	253.793	0.321204	0.00126561
5.208	2941.96	347.844	8.45753	253.624	0.324627	0.00127995
5.232	2908.29	343.178	8.46724	253.478	0.327719	0.00129289
5.256	2871.71	338.756	8.47821	253.312	0.330892	0.00130626
5.28	2838.89	335.66	8.4893	253.145	0.326335	0.00128912
5.304	2803.55	330.915	8.4998	252.986	0.32961	0.00130288
5.328	2770.89	324.936	8.5147	252.759	0.333896	0.00132101
5.352	2736.85	320.617	8.52746	252.565	0.337297	0.00133549
5.376	2700.57	316.234	8.53849	252.397	0.340634	0.0013496
5.4	2667.55	311.681	8.55196	252.191	0.34431	0.00136527
5.424	2634.21	307.809	8.56977	251.918	0.348094	0.00138177
5.448	2602.13	302.489	8.58638	251.663	0.352554	0.0014009
5.472	2567.51	298.617	8.59841	251.478	0.355927	0.00141534
5.496	2536.34	295.064	8.60955	251.307	0.35907	0.00142881
5.52	2509.65	290.959	8.62132	251.125	0.355109	0.00141407
5.544	2480.02	286.592	8.632	250.96	0.358681	0.00142924
5.568	2449.35	283	8.6469	250.729	0.362248	0.00144478
5.592	2418.73	279.306	8.65807	250.556	0.365596	0.00145914
5.616	2390.51	276.082	8.66941	250.38	0.36871	0.0014726
5.64	2363.9	272.673	8.68072	250.204	0.371961	0.00148663
5.664	2336.69	269.327	8.69124	250.041	0.375155	0.00150038
5.688	2312.37	265.122	8.7022	249.87	0.378958	0.00151662
5.712	2287.24	262.143	8.71209	249.716	0.381946	0.00152953
5.736	2260.45	259.143	8.72624	249.495	0.385364	0.00154458
5.76	2236.84	256.51	8.74274	249.236	0.381041	0.00152884
5.784	2211.84	253.039	8.75984	248.968	0.385007	0.00154641
5.808	2185.43	249.078	8.77746	248.692	0.389423	0.00156589
5.832	2158.63	246.314	8.78934	248.505	0.392591	0.00157981
5.856	2132.65	241.922	8.80216	248.303	0.397059	0.00159909
5.88	2109.86	238.667	8.81496	248.102	0.400733	0.0016152
5.904	2085.14	235.412	8.82717	247.909	0.404436	0.00163139
5.928	2059.92	232.235	8.83967	247.712	0.408163	0.00164774
5.952	2034.86	229.863	8.84707	247.595	0.410895	0.00165955
5.976	2012.98	227.039	8.85634	247.448	0.414149	0.00167368
6	1993.13	224.868	8.86	247.39	0.408508	0.00165127
6.024	1968.57	222.321	8.862	247.358	0.41102	0.00166164
6.048	1946.42	219.226	8.86184	247.361	0.413841	0.00167302
6.072	1922.81	217.132	8.86272	247.347	0.415956	0.00168167
6.096	1901.94	214.528	8.86781	247.266	0.418853	0.00169393
6.12	1878.58	212.132	8.87181	247.203	0.421554	0.0017053
6.144	1858.23	209.679	8.8758	247.14	0.424315	0.0017169
6.168	1835.79	207.302	8.88265	247.031	0.427304	0.00172976
6.192	1814.79	204.377	8.89	246.915	0.430878	0.00174505
6.216	1794.98	201.491	8.90511	246.675	0.435086	0.0017638
6.24	1776.55	199.382	8.92274	246.395	0.430715	0.00174807
6.264	1755.58	197.091	8.942	246.088	0.434693	0.00176641
6.288	1735.65	194.364	8.9601	245.8	0.439049	0.0017862
6.312	1716.45	191.582	8.97806	245.514	0.443501	0.00180642
6.336	1699.36	188.364	8.99393	245.261	0.448301	0.00182785
6.36	1679.98	185.436	9.00903	245.02	0.452848	0.00184821
6.384	1660.04	183.073	9.02666	244.738	0.457036	0.00186745
6.408	1641.75	181.182	9.05053	244.356	0.461157	0.00188724
6.432	1623	179.273	9.07385	243.982	0.465286	0.00190705
6.456	1605.55	177.327	9.09642	243.62	0.469408	0.0019268
6.48	1590.75	175.298	9.11539	243.316	0.464993	0.00191107
6.504	1572.63	172.737	9.13114	243.063	0.469409	0.00193122
6.528	1557.3	169.825	9.14817	242.79	0.474382	0.00195388
6.552	1538.98	167.526	9.16801	242.471	0.478888	0.00197503
6.576	1522.33	165.333	9.18689	242.167	0.483226	0.00199542
6.6	1504.23	162.965	9.20633	241.854	0.487914	0.00201739
6.624	1487.14	161.07	9.2271	241.52	0.492083	0.00203744
6.648	1471.21	158.965	9.24594	241.217	0.496449	0.0020581
6.672	1455.91	156.895	9.2575	241.03	0.500364	0.00207593
6.696	1439.67	155.456	9.26697	240.878	0.503305	0.00208946
6.72	1425.54	153.814	9.27475	240.753	0.497785	0.00206762
6.744	1410.75	151.644	9.28109	240.65	0.501622	0.00208444
6.768	1394.36	149.746	9.28985	240.509	0.505296	0.00210094
6.792	1378.19	148.237	9.29854	240.369	0.508418	0.00211516
6.816	1363.37	146.746	9.30417	240.279	0.511348	0.00212815
6.84	1348.78	145.136	9.31432	240.115	0.514775	0.00214387
6.864	1333.69	143.407	9.3255	239.935	0.518512	0.00216105
6.888	1321.44	141.644	9.33483	239.784	0.522199	0.00217778
6.912	1306.22	139.695	9.34359	239.643	0.526286	0.00219612
6.936	1290.69	138.169	9.35567	239.448	0.529914	0.00221306
6.96	1279.44	136.508	9.37148	239.194	0.525131	0.00219542
6.984	1265.48	134.754	9.38603	238.959	0.529308	0.00221506
7.008	1251.41	133.049	9.40294	238.686	0.533591	0.00223553
7.032	1238.28	131.623	9.4169	238.461	0.537238	0.00225293
7.056	1224.98	129.902	9.43057	238.241	0.541471	0.00227279
7.08	1211.31	127.984	9.44745	237.969	0.54633	0.0022958
7.104	1198.41	126.77	9.46206	237.733	0.549749	0.00231246
7.128	1184.82	124.902	9.47603	237.508	0.554494	0.00233463
7.152	1172.15	123.607	9.48756	237.323	0.558004	0.00235125
7.176	1159.43	122.033	9.50029	237.118	0.562202	0.00237098
7.2	1149.29	120.635	9.51228	236.924	0.556938	0.0023507
7.224	1137.81	119.349	9.5213	236.779	0.560366	0.00236662
7.248	1124.14	117.778	9.53366	236.58	0.56468	0.00238684
7.272	1113.17	116.778	9.54504	236.397	0.567691	0.00240143
7.296	1101.63	115.381	9.55994	236.157	0.571805	0.00242129
7.32	1090.52	114.048	9.57536	235.909	0.575845	0.00244096
7.344	1078.13	112.73	9.59012	235.672	0.579902	0.00246063
7.368	1065.79	111.143	9.60866	235.374	0.584831	0.00248469
7.392	1055.1	109.778	9.62369	235.132	0.589092	0.00250537
7.416	1044.3	108.254	9.64195	234.839	0.59396	0.00252922
7.44	1034.6	106.985	9.66068	234.538	0.588973	0.0025112
7.464	1023.34	105.615	9.67984	234.231	0.593561	0.00253409
7.488	1012.25	103.954	9.69923	233.92	0.598978	0.00256062
7.512	1001.62	103.154	9.71638	233.645	0.602097	0.00257698
7.536	991.6	101.877	9.73565	233.336	0.606586	0.00259962
7.56	980.631	100.538	9.75203	233.074	0.611215	0.00262241
7.584	970.662	99.3231	9.76664	232.84	0.615472	0.00264332
7.608	961.462	98.3385	9.78117	232.608	0.619104	0.00266158
7.632	951.631	97.3231	9.79126	232.446	0.622715	0.00267896
7.656	942.723	95.9692	9.80421	232.239	0.627457	0.00270177
7.68	934.582	95.1045	9.81398	232.084	0.62118	0.00267654
7.704	924.582	94.0448	9.82087	231.974	0.624914	0.0026939
7.728	915.97	93	9.83071	231.816	0.628726	0.00271217
7.752	907.09	92.1045	9.84321	231.617	0.632235	0.00272965
7.776	897.448	91.0896	9.85713	231.395	0.636238	0.00274957
7.8	886.985	90.1343	9.86284	231.304	0.63984	0.00276623
7.824	877.478	89.2687	9.86945	231.199	0.643204	0.00278203
7.848	868.94	87.9403	9.87721	231.075	0.648164	0.00280499
7.872	860.194	86.7612	9.88533	230.946	0.652738	0.00282636
7.896	851.119	85.7015	9.89624	230.773	0.657093	0.00284736
7.92	843.609	85.3333	9.9044	230.643	0.649309	0.00281521
7.944	833.71	84.2174	9.91195	230.523	0.653812	0.00283621
7.968	824.957	83.1884	9.9193	230.406	0.658038	0.00285599
7.992	816.246	82.1304	9.92229	230.359	0.662297	0.00287507
8.016	807.594	81.0145	9.92243	230.356	0.666756	0.00289446
8.04	798.681	80.3333	9.92094	230.38	0.669607	0.00290653
8.064	790.594	79.6667	9.92015	230.393	0.672433	0.00291864
8.088	781.638	78.8696	9.91778	230.43	0.675782	0.0029327
8.112	774.435	78.1159	9.91686	230.445	0.678991	0.00294644
8.136	767.13	77.3623	9.91438	230.484	0.682197	0.00295984
8.16	760.225	76.6761	9.91279	230.51	0.675472	0.00293034
8.184	752.211	76.1549	9.91242	230.515	0.677884	0.00294073
8.208	743.845	75.338	9.91828	230.422	0.681766	0.00295877
8.232	736.014	74.2958	9.92478	230.319	0.686653	0.00298131
8.256	728.817	73.5352	9.93388	230.175	0.690495	0.00299987
8.28	721.662	72.5211	9.9427	230.034	0.695481	0.00302338
8.304	713.859	71.831	9.95265	229.877	0.699193	0.0030416
8.328	707.901	70.8732	9.9659	229.667	0.704185	0.00306612
8.352	701.831	70.3099	9.97901	229.459	0.707454	0.00308314
8.376	694.775	69.3803	9.98617	229.345	0.712307	0.00310583
8.4	688.986	68.8082	9.99957	229.133	0.705825	0.00308041
8.424	682.603	68.0959	10.0059	229.034	0.70967	0.00309854
8.448	675.808	67.4247	10.0146	228.896	0.713469	0.00311701
8.472	668.849	66.7671	10.0153	228.885	0.717013	0.00313264
8.496	662.178	66.3151	10.0162	228.87	0.719587	0.00314408
8.52	656.562	65.274	10.016	228.873	0.725057	0.00316794
8.544	649.397	64.8082	10.0163	228.87	0.72779	0.00317993
8.568	642.466	64.0274	10.0198	228.813	0.732281	0.00320034
8.592	635.356	63.5616	10.0258	228.718	0.735275	0.00321476
8.616	628.945	62.9452	10.0355	228.565	0.739183	0.00323402
8.64	624.08	62.3333	10.0484	228.363	0.733152	0.00321047
8.664	617.76	61.68	10.0544	228.267	0.737194	0.00322952
8.688	611.853	60.8	10.0674	228.063	0.742734	0.00325671
8.712	606.293	60.0933	10.0824	227.826	0.747439	0.00328075
8.736	599.92	59.2533	10.0986	227.571	0.753059	0.00330911
8.76	593.667	58.6267	10.1158	227.3	0.757545	0.0033328
8.784	588.2	58.0933	10.1307	227.066	0.76142	0.0033533
8.808	582.947	57.36	10.1452	226.839	0.766526	0.00337917
8.832	576.907	56.56	10.1553	226.681	0.772062	0.00340594
8.856	571.48	56.1733	10.1615	226.584	0.774963	0.00342019
8.88	567.143	55.7013	10.166	226.514	0.76815	0.00339118
8.904	561.922	55.2208	10.1704	226.444	0.771617	0.00340755
8.928	556.844	54.7273	10.1765	226.349	0.775241	0.00342498
8.952	551.104	54.1688	10.1773	226.336	0.779252	0.0034429
8.976	546.247	53.7792	10.175	226.373	0.782069	0.00345479
9	541.078	53.1818	10.1775	226.334	0.786452	0.00347475
9.024	536.532	52.7273	10.1783	226.321	0.78985	0.00348996
9.048	531.675	52.1688	10.1804	226.287	0.794065	0.0035091
9.072	526.052	51.7143	10.1823	226.259	0.79766	0.00352544
9.096	521	51.2078	10.183	226.247	0.801606	0.00354305
9.12	517.139	50.6962	10.1909	226.123	0.795481	0.00351791
9.144	511.481	50.1899	10.2022	225.946	0.799793	0.00353975
9.168	507.266	49.7342	10.2106	225.816	0.803617	0.00355872
9.192	502.785	49.3165	10.2165	225.724	0.807169	0.00357591
9.216	498.127	48.9241	10.2282	225.54	0.810721	0.00359457
9.24	493.684	48.1899	10.2403	225.353	0.816923	0.00362508
9.264	488.861	47.4684	10.2489	225.219	0.82311	0.00365471
9.288	484.38	47.1772	10.2575	225.084	0.825948	0.0036695
9.312	479.835	46.7848	10.2658	224.956	0.829623	0.00368793
9.336	475.582	46.1646	10.2764	224.79	0.83524	0.00371564
9.36	472.062	45.8025	10.288	224.61	0.828341	0.00368791
9.384	467.37	45.3951	10.2949	224.503	0.832228	0.00370697
9.408	462.481	44.963	10.3	224.424	0.836355	0.00372668
9.432	458.235	44.5309	10.3083	224.296	0.84055	0.0037475
9.456	453.864	44.0123	10.3189	224.132	0.845612	0.00377283
9.48	449.667	43.6173	10.3266	224.013	0.84959	0.0037926
9.504	445.037	43.1235	10.3349	223.884	0.854557	0.00381697
9.528	440.926	42.5802	10.3455	223.72	0.860057	0.00384435
9.552	436.951	42.1852	10.3595	223.504	0.864313	0.00386711
9.576	433.346	41.7778	10.3753	223.259	0.868734	0.00389115
9.6	429.976	41.3976	10.3907	223.021	0.862335	0.00386661
9.624	425.952	40.9639	10.4111	222.708	0.867159	0.0038937
9.648	421.759	40.506	10.4298	222.42	0.872266	0.00392171
9.672	417.578	40	10.4446	222.193	0.87787	0.00395094
9.696	413.675	39.5301	10.4589	221.973	0.883167	0.00397871
9.72	409.675	39.0843	10.4724	221.768	0.888296	0.00400553
9.744	405.458	38.494	10.4842	221.586	0.895035	0.00403922
9.768	401.639	38.1566	10.4934	221.445	0.899116	0.00406021
9.792	397.53	37.7952	10.5036	221.29	0.903548	0.00408309
9.816	393.88	37.4578	10.5104	221.186	0.907692	0.00410375
9.84	390.247	37.0941	10.5161	221.098	0.901377	0.00407681
9.864	386.906	36.7882	10.5246	220.969	0.905215	0.00409657
9.888	383.412	36.5176	10.5309	220.874	0.908691	0.00411407
9.912	379.6	36.0706	10.5397	220.74	0.914296	0.00414196
9.936	376.424	35.8	10.5547	220.512	0.917915	0.00416266
9.96	372.941	35.4235	10.574	220.218	0.922889	0.0041908
9.984	369.129	34.9059	10.5942	219.912	0.929677	0.00422749
10.008	365.576	34.4824	10.6121	219.64	0.935384	0.00425872
10.032	362.424	34.1176	10.631	219.355	0.940399	0.00428711
10.056	359.329	33.6353	10.6487	219.088	0.946975	0.00432236
10.08	356.368	33.2184	10.6651	218.841	0.941782	0.0043035
10.104	352.885	32.8506	10.6783	218.643	0.947033	0.00433142
10.128	349.897	32.6552	10.6933	218.416	0.950008	0.00434953
10.152	346.678	32.3793	10.7069	218.212	0.954108	0.00437239
10.176	343.609	32.0575	10.7237	217.96	0.958868	0.00439929
10.2	340.759	31.8621	10.7384	217.741	0.961908	0.00441767
10.224	336.874	31.5632	10.7468	217.615	0.96654	0.00444152
10.248	333.448	31.046	10.7579	217.449	0.974296	0.00448057
10.272	330.092	30.7011	10.7773	217.159	0.979695	0.00451141
10.296	326.966	30.2529	10.7984	216.846	0.986677	0.00455014
10.32	324.337	29.9101	10.8251	216.449	0.980897	0.00453177
10.344	321.348	29.6966	10.8509	216.066	0.98441	0.00455606
10.368	318.36	29.3034	10.8838	215.58	0.990667	0.00459536
10.392	315.449	28.8652	10.906	215.253	0.997778	0.00463537
10.416	312.056	28.5281	10.9302	214.897	1.00345	0.00466944
10.44	308.843	28.0449	10.9519	214.579	1.0116	0.00471435
10.464	305.685	27.8427	10.9717	214.289	1.01522	0.00473762
10.488	302.899	27.4494	10.9903	214.017	1.02207	0.00477566
10.512	300.157	27.3258	11.0037	213.823	1.02444	0.00479108
10.536	297.742	27.0225	11.0136	213.677	1.02994	0.00482005
10.56	295.462	26.7473	11.0178	213.616	1.02363	0.00479191
10.584	292.692	26.4615	11.016	213.643	1.0291	0.00481694
10.608	289.824	26.2857	11.0201	213.584	1.03263	0.00483478
10.632	286.648	26.033	11.0237	213.531	1.03765	0.00485948
10.656	283.835	25.7143	11.0367	213.342	1.0438	0.00489261
10.68	281.505	25.6264	11.0455	213.214	1.04569	0.00490443
10.704	279.033	25.3846	11.0511	213.132	1.05056	0.00492915
10.728	276.44	25.0769	11.0522	213.117	1.05685	0.00495901
10.752	274.187	24.7582	11.058	213.032	1.06335	0.00499149
10.776	271.209	24.3736	11.0653	212.927	1.0714	0.00503176
10.8	268.925	24.1935	11.0712	212.842	1.06372	0.00499771
10.824	266.484	23.9892	11.0804	212.708	1.06814	0.00502163
10.848	263.839	23.828	11.0887	212.588	1.07178	0.00504157
10.872	261.032	23.5376	11.0977	212.457	1.07817	0.00507474
10.896	258.065	23.2688	11.1066	212.329	1.08424	0.00510641
10.92	255.731	23.0323	11.1103	212.276	1.08969	0.00513334
10.944	253.194	22.8387	11.1196	212.142	1.09422	0.00515795
10.968	250.634	22.6129	11.1281	212.02	1.09954	0.00518603
10.992	248.419	22.3333	11.1433	211.801	1.10599	0.00522185
11.016	245.667	21.9892	11.1599	211.563	1.11412	0.00526616
11.04	243.453	21.8	11.1747	211.35	1.10686	0.00523711
11.064	240.537	21.4421	11.1868	211.178	1.11564	0.00528293
11.088	238.063	21.2526	11.1994	210.998	1.12043	0.00531014
11.112	235.937	20.9895	11.2161	210.759	1.12694	0.00534707
11.136	233.863	20.7474	11.2265	210.61	1.13316	0.00538037
11.16	231.474	20.5684	11.2284	210.584	1.13812	0.00540459
11.184	229.095	20.3895	11.2356	210.481	1.14303	0.00543054
11.208	226.495	20.1789	11.2428	210.379	1.14887	0.00546095
11.232	224.768	19.9474	11.2516	210.254	1.15515	0.00549407
11.256	222.274	19.7789	11.2485	210.298	1.16025	0.00551718
11.28	220.165	19.6701	11.2473	210.315	1.15161	0.00547567
11.304	217.979	19.3814	11.2444	210.357	1.15999	0.0055144
11.328	215.68	19.0928	11.2371	210.46	1.16867	0.00555296
11.352	213.515	18.8969	11.2324	210.527	1.17481	0.00558031
11.376	211.309	18.8557	11.2246	210.638	1.17665	0.00558611
11.4	209.041	18.567	11.2204	210.698	1.18562	0.00562712
11.424	207.072	18.4536	11.2176	210.737	1.18948	0.00564438
11.448	204.608	18.3402	11.2113	210.828	1.19357	0.00566135
11.472	202.371	18.1134	11.2009	210.976	1.20116	0.00569336
11.496	200.474	17.9278	11.1903	211.128	1.20754	0.00571945
11.52	199.071	17.7879	11.1917	211.108	1.1999	0.00568383
11.544	197.323	17.6768	11.1873	211.17	1.20388	0.005701
11.568	195.313	17.4747	11.1845	211.21	1.21081	0.00573274
11.592	193.374	17.2929	11.1936	211.08	1.21695	0.00576536
11.616	191.333	17.1111	11.2046	210.924	1.22318	0.00579913
11.64	189.646	16.899	11.2125	210.811	1.23048	0.00583687
11.664	187.98	16.7677	11.2251	210.631	1.23506	0.00586364
11.688	185.828	16.6061	11.2353	210.485	1.24092	0.00589552
11.712	183.97	16.3434	11.2436	210.367	1.25036	0.00594371
11.736	182.051	16.1212	11.2476	210.311	1.25869	0.00598491
11.76	180.644	16.0297	11.248	210.306	1.24982	0.00594286
11.784	178.822	15.7822	11.2465	210.326	1.25933	0.00598754
11.808	177.05	15.703	11.2478	210.308	1.26273	0.00600419
11.832	175.495	15.5743	11.2597	210.139	1.26768	0.00603261
11.856	173.832	15.4851	11.2653	210.06	1.27139	0.0060525
11.88	172.109	15.3861	11.2625	210.099	1.27572	0.00607203
11.904	170.545	15.2178	11.2618	210.109	1.28268	0.00610482
11.928	168.812	15.0396	11.2549	210.207	1.29034	0.00613845
11.952	167.584	14.802	11.2565	210.185	1.30016	0.00618581
11.976	166.287	14.6931	11.257	210.177	1.30498	0.00620896
12	164.893	14.6408	11.2629	210.093	1.29466	0.00616234
12.024	163.34	14.5049	11.2711	209.977	1.30052	0.00619362
12.048	161.835	14.3786	11.2778	209.882	1.30607	0.00622289
12.072	160.388	14.2039	11.2904	209.703	1.31358	0.006264
12.096	159.155	14.1165	11.2992	209.58	1.31749	0.00628635
12.12	157.631	13.9612	11.3109	209.415	1.32441	0.00632434
12.144	156.107	13.8447	11.3215	209.264	1.32975	0.0063544
12.168	154.864	13.7282	11.3329	209.104	1.33504	0.00638457
12.192	153.573	13.5146	11.3435	208.955	1.34484	0.00643604
12.216	152.087	13.3204	11.3492	208.874	1.35418	0.00648324
12.24	150.981	13.1905	11.3504	208.858	1.34764	0.00645243
12.264	149.562	13.1429	11.3492	208.875	1.35043	0.00646526
12.288	148.133	13.0095	11.3501	208.862	1.35728	0.00649845
12.312	146.638	12.8952	11.35	208.864	1.36335	0.00652748
12.336	145.343	12.8	11.3438	208.951	1.36868	0.00655025
12.36	143.829	12.7429	11.3374	209.041	1.37227	0.0065646
12.384	142.524	12.6381	11.3202	209.283	1.37849	0.00658674
12.408	141.457	12.5333	11.3129	209.387	1.3844	0.00661171
12.432	140.076	12.419	11.3049	209.499	1.39102	0.00663976
12.456	138.771	12.2857	11.2908	209.699	1.39887	0.00667084
12.48	137.972	12.1589	11.2794	209.859	1.39299	0.00663774
12.504	136.243	12.1028	11.2709	209.979	1.3969	0.00665255
12.528	135.056	11.9533	11.2585	210.156	1.40573	0.006689
12.552	133.794	11.8411	11.2431	210.375	1.41278	0.00671552
12.576	132.495	11.8131	11.229	210.575	1.41524	0.00672084
12.6	131.402	11.7009	11.2121	210.817	1.42236	0.00674691
12.624	130.14	11.6262	11.1852	211.201	1.42777	0.00676024
12.648	128.794	11.5607	11.1618	211.536	1.43263	0.00677249
12.672	127.477	11.4673	11.1324	211.958	1.43923	0.00679014
12.696	126.215	11.3458	11.0992	212.437	1.44756	0.00681404
12.72	125.358	11.2844	11.0762	212.768	1.43863	0.00676148
12.744	124.101	11.2294	11.0456	213.213	1.44301	0.00676791
12.768	123.018	11.1835	11.0286	213.46	1.44652	0.00677657
12.792	121.835	11.1009	11.0149	213.658	1.45225	0.00679705
12.816	121.073	11.0734	10.9975	213.913	1.45454	0.00679969
12.84	120.202	10.9633	10.9729	214.271	1.462	0.00682313
12.864	119.119	10.9358	10.9498	214.61	1.46453	0.00682415
12.888	118.046	10.7248	10.93	214.9	1.47845	0.00687972
12.912	116.862	10.633	10.9194	215.056	1.48502	0.00690527
12.936	115.358	10.5596	10.9161	215.104	1.49058	0.00692958
12.96	114.414	10.5405	10.919	215.062	1.4788	0.00687613
12.984	113.333	10.4414	10.9246	214.98	1.48574	0.00691107
13.008	112.441	10.3784	10.933	214.856	1.49027	0.00693614
13.032	111.378	10.2342	10.9299	214.903	1.50048	0.00698216
13.056	110.577	10.1081	10.917	215.091	1.50963	0.00701854
13.08	109.649	10	10.913	215.151	1.51766	0.00705393
13.104	108.568	9.84685	10.9119	215.166	1.52907	0.00710649
13.128	107.676	9.8018	10.9148	215.123	1.53279	0.00712516
13.152	106.856	9.73874	10.9218	215.021	1.53774	0.00715159
13.176	105.658	9.73874	10.9241	214.987	1.53845	0.00715599
13.2	104.947	9.64602	10.9171	215.089	1.53198	0.00712251
13.224	104.212	9.61062	10.9081	215.222	1.5351	0.00713266
13.248	103.274	9.48673	10.8957	215.405	1.54496	0.00717235
13.272	102.345	9.38053	10.8847	215.567	1.55364	0.00720719
13.296	101.265	9.28319	10.8705	215.777	1.56189	0.00723843
13.32	100.363	9.23894	10.8677	215.818	1.56592	0.00725574
13.344	99.5221	9.15929	10.861	215.917	1.57275	0.00728403
13.368	98.7699	9.0708	10.8553	216.002	1.5803	0.00731615
13.392	97.6814	8.99115	10.847	216.125	1.58749	0.00734527
13.416	96.6726	8.93805	10.8363	216.282	1.59257	0.00736337
13.44	95.9565	8.86957	10.82	216.525	1.58481	0.00731929
13.464	95	8.7913	10.8099	216.675	1.59197	0.00734725
13.488	94.0261	8.72174	10.8054	216.742	1.59848	0.00737505
13.512	93.4	8.65217	10.7907	216.959	1.60485	0.007397
13.536	92.6348	8.58261	10.7845	217.053	1.61137	0.00742384
13.56	91.8	8.55652	10.7832	217.072	1.61424	0.00743642
13.584	91.4348	8.50435	10.7849	217.047	1.61903	0.00745936
13.608	90.7652	8.3913	10.7908	216.959	1.62947	0.0075105
13.632	89.7391	8.36522	10.797	216.866	1.63256	0.00752797
13.656	88.8957	8.23478	10.7972	216.864	1.645	0.0075854
13.68	88.0769	8.15385	10.7932	216.923	1.63892	0.0075553
13.704	87.5299	8.07692	10.801	216.806	1.64646	0.00759413
13.728	86.6923	7.97436	10.8068	216.721	1.65677	0.00764472
13.752	86.0513	7.93162	10.807	216.717	1.66137	0.00766607
13.776	85.265	7.89744	10.8166	216.576	1.66526	0.00768905
13.8	84.6154	7.87179	10.8291	216.39	1.66822	0.00770931
13.824	84.0256	7.76923	10.8367	216.277	1.67871	0.00776188
13.848	83.4701	7.71795	10.8459	216.14	1.68422	0.00779227
13.872	82.8547	7.65812	10.8523	216.046	1.69072	0.00782572
13.896	82.3077	7.59829	10.8758	215.698	1.69708	0.00786787
13.92	81.8571	7.48739	10.9166	215.097	1.6941	0.00787597
13.944	81.0504	7.44538	10.9618	214.435	1.69858	0.00792122
13.968	80.521	7.36134	11.0065	213.781	1.70718	0.00798567
13.992	79.8992	7.30252	11.0569	213.048	1.71305	0.00804069
14.016	79.3445	7.14286	11.1009	212.412	1.73002	0.00814465
14.04	78.7143	7	11.1465	211.756	1.74555	0.00824323
14.064	77.9664	6.93277	11.1843	211.213	1.75293	0.00829936
14.088	77.2521	6.83193	11.2175	210.739	1.76443	0.00837258
14.112	76.5294	6.73109	11.2397	210.423	1.77649	0.00844249
14.136	75.7983	6.70588	11.2652	210.061	1.7794	0.00847089
14.16	75.3058	6.64463	11.2822	209.82	1.77197	0.00844521
14.184	74.6612	6.57851	11.2903	209.705	1.78047	0.00849035
14.208	74.1074	6.58678	11.3008	209.557	1.77961	0.00849223
14.232	73.3802	6.56198	11.3042	209.509	1.78329	0.00851176
14.256	72.8017	6.4876	11.2983	209.593	1.79344	0.00855679
14.28	72.157	6.38843	11.3	209.569	1.80677	0.00862135
14.304	71.4711	6.30579	11.2993	209.579	1.81834	0.00867616
14.328	70.9835	6.24793	11.2924	209.676	1.82681	0.00871254
14.352	70.3223	6.19835	11.2913	209.691	1.83425	0.0087474
14.376	69.6942	6.16529	11.3012	209.551	1.83906	0.00877621
14.4	69.2195	6.11382	11.3088	209.444	1.83131	0.0087437
14.424	68.6911	6.06504	11.312	209.399	1.83852	0.00877997
14.448	68.0976	6.04065	11.3152	209.354	1.84245	0.00880066
14.472	67.439	6	11.3253	209.212	1.84852	0.00883564
14.496	66.8293	5.9187	11.3406	208.995	1.86022	0.00890078
14.52	66.2683	5.86179	11.3583	208.747	1.86842	0.00895065
14.544	65.6748	5.79675	11.3727	208.546	1.87811	0.00900576
14.568	65.2602	5.73984	11.3843	208.382	1.88663	0.00905373
14.592	64.8211	5.65041	11.408	208.051	1.89978	0.00913136
14.616	64.4065	5.5935	11.4311	207.728	1.9081	0.00918555
14.64	64.024	5.568	11.4379	207.634	1.8969	0.00913576
14.664	63.368	5.52	11.4399	207.606	1.90516	0.00917679
14.688	62.768	5.48	11.4405	207.598	1.91224	0.00921128
14.712	62.376	5.408	11.4324	207.711	1.92477	0.00926658
14.736	61.792	5.376	11.4137	207.971	1.93161	0.00928791
14.76	61.192	5.384	11.3953	208.228	1.93188	0.00927771
14.784	60.624	5.352	11.3873	208.341	1.93827	0.00930335
14.808	60.216	5.312	11.3787	208.461	1.94587	0.00933445
14.832	59.56	5.28	11.3623	208.691	1.95286	0.00935766
14.856	59.04	5.24	11.3404	208.999	1.96133	0.00938438
14.88	58.7874	5.19685	11.3231	209.242	1.95428	0.00933979
14.904	58.3071	5.11024	11.3118	209.402	1.97055	0.00941037
14.928	57.7323	5.07087	11.3143	209.366	1.97825	0.00944876
14.952	57.0787	5.06299	11.321	209.272	1.98031	0.00946283
14.976	56.7323	5.02362	11.3296	209.15	1.98755	0.00950299
15	56.252	4.97638	11.3377	209.037	1.99655	0.00955118
15.024	55.7638	4.96063	11.3438	208.951	1.9999	0.00957117
15.048	55.4331	4.88189	11.3365	209.054	2.01546	0.00964087
15.072	55.0709	4.82677	11.3306	209.137	2.02679	0.00969124
15.096	54.6378	4.80315	11.3395	209.011	2.03163	0.00972022
	54.4031	4.7907	11.3429
	53.9845	4.74419	11.3437
	53.5736	4.72868	11.3407
	53.1783	4.69767	11.3263
	52.8062	4.64341	11.3081
	52.4341	4.62791	11.2935
	51.9147	4.58915	11.2818
	51.3488	4.5814	11.2679
	50.7752	4.53488	11.257
	50.5736	4.51163	11.2531
	50.1679	4.47328	11.2438
	49.7939	4.43511	11.2391
	49.3588	4.39695	11.2325
	48.8626	4.35878	11.2402
	48.5496	4.30534	11.2561
	48.0916	4.26718	11.2756
	47.8702	4.24427	11.2978
	47.5344	4.22901	11.3177
	47.1527	4.17557	11.3435
	46.7863	4.1145	11.3713
	46.5564	4.07519	11.3905
	46.1805	4.03008	11.411
	45.8722	4.00752	11.4396
	45.5188	3.95489	11.47
	45.1955	3.92481	11.4965
	44.7444	3.89474	11.5127
	44.3383	3.85714	11.5275
	44.0226	3.79699	11.5557
	43.6842	3.77444	11.5878
	43.3759	3.74436	11.6048
	43.1185	3.73333	11.6201
	43	3.71111	11.6404
	42.7185	3.62963	11.6507
	42.3926	3.59259	11.6532
	42.1037	3.6	11.6572
	41.7185	3.57037	11.6673
	41.4667	3.54074	11.6747
	41.0148	3.53333	11.6883
	40.7185	3.5037	11.696
	40.363	3.47407	11.6842
	40.1241	3.43066	11.6855
	39.7299	3.41606	11.6898
	39.4088	3.35766	11.692
	39.1095	3.29927	11.6994
	38.7591	3.32117	11.706
	38.4599	3.28467	11.7072
	38.1095	3.24818	11.7103
	37.8613	3.22628	11.721
	37.6277	3.21898	11.7205
	37.3869	3.19708	11.7136
	37.2374	3.20144	11.7272
	36.964	3.15108	11.7476
	36.7626	3.1295	11.7523
	36.4604	3.10791	11.7529
	36.2662	3.07914	11.7586
	35.9712	3.04317	11.7594
	35.7986	3	11.7716
	35.5252	3.01439	11.7862
	35.3094	3.00719	11.8081
	35.0863	2.98561	11.8336
	34.8582	2.97872	11.8406
	34.5461	2.93617	11.8399
	34.2411	2.87943	11.8231
	34.1773	2.85106	11.8174
	33.9078	2.8227	11.8166
	33.6312	2.83688	11.8192
	33.4255	2.82979	11.8211
	33.1631	2.8227	11.8095
	32.922	2.80851	11.7909
	32.7872	2.79433	11.7707
	32.6224	2.76923	11.7588
	32.3007	2.75524	11.7678
	32.0629	2.75524	11.7778
	31.8741	2.72727	11.7903
	31.6783	2.69231	11.8022
	31.4056	2.64336	11.8091
	31.1818	2.60839	11.8123
	31.014	2.6014	11.8234
	30.6713	2.58042	11.85
	30.4196	2.56643	11.8771
