# Supplementary material for: Tropospheric temperature measurements with the pure rotational Raman lidar technique using nonlinear calibration functions
Source: Copernicus journal article supplement (doi:10.5194/amt-10-315-2017), 2017-01-27
Supplement: Supplementary file 47 [file 02.10.2014. Temperature profile retrieved using Eqs. (13) and (18).xlsx]

## Sheet: Лист1
z, km
Altitude	Smoothed signals	Smoothed signals	Smoothed ratio
0.048	573	65.5	8.59143	250.322	3.44801	0.0137743	A1	0.075	282.75	0.143	286.15	0.83	277.15			251.318	3.60929	0.0143615
0.072	743	82	8.45197	252.341	2.48736	0.00985711	-3.16533	0.182	283.75	0.188	285.55	1.51	274.35			253.407	2.54211	0.0100317
0.096	995.333	113	8.38058	253.381	2.11206	0.00833551		0.199	283.55	0.484	282.75	3.05	266.15	3.048	0.877496	254.462	2.12831	0.00836396	0.333765
0.12	1177.67	135	8.307	254.456	1.92447	0.00756306	B1	0.24	283.25	0.737	280.25	5.61	250.65	5.616	1.45127	255.537	1.90861	0.00746903	0.51545
0.144	1215.67	150.333	8.2572	255.187	1.82564	0.00715412	2156.11	0.647	280.35	0.835	279.35	7.21	238.15	7.2	0.980342	256.257	1.78966	0.00698386	1.19152
0.168	1204.67	148.333	8.21704	255.777	1.83321	0.00716723		0.821	277.75	1.517	273.55	9.14	224.15	9.144	2.96833	256.833	1.77941	0.00692827	1.94155
0.192	1167.67	153.333	8.11769	257.245	1.79977	0.00699632	C1	1.186	273.95	1.555	273.25	12	210.65	12	1.76991	258.24	1.70119	0.00658764	0.605356
0.216	1124.33	142.667	8.00646	258.901	1.85164	0.0071519	-206610	1.341	274.55	2.11	268.65					259.78	1.69263	0.00651562
0.24	1085.2	140.6	7.94315	259.85	1.4421	0.00554974		1.5	275.35	2.702	268.65					260.638	1.29093	0.00495295
0.264	1046.4	134	7.84723	261.296	1.46982	0.00562511		1.548	275.15	3.053	266.65					261.911	1.27097	0.00485267
0.288	1008.2	129	7.81317	261.813	1.49577	0.00571314		1.605	274.75	3.943	262.05					262.355	1.27647	0.00486545
0.312	976.8	127.6	7.78997	262.165	1.50427	0.00573788		2.242	269.65	4.143	262.05					262.654	1.2719	0.00484249
0.336	954.6	121.8	7.79515	262.087	1.53794	0.00586804		2.449	270.05	4.257	262.05					262.588	1.30308	0.00496244
0.36	928	114.4	7.78307	262.27	1.58306	0.00603598		2.661	268.55	5.195	255.85					262.743	1.33477	0.00508016
0.384	901.8	117.6	7.76429	262.557	1.56511	0.00596105		2.879	267.05	5.59	253.25					262.983	1.30949	0.00497937
0.408	888.4	115.2	7.73749	262.966	1.57911	0.00600499		3.046	265.85	5.62	252.65					263.324	1.30636	0.00496104
0.432	870	110.6	7.70801	263.417	1.60792	0.00610409		3.192	264.45	6.572	244.15					263.695	1.31327	0.00498028
0.456	842.4	109.8	7.69118	263.675	1.61502	0.00612503		3.397	264.45	7.03	240.05					263.904	1.30922	0.00496097
0.48	834.571	107.714	7.66519	264.074	1.37595	0.00521046		3.502	263.55	7.22	239.65					264.226	1.10229	0.00417177
0.504	819.857	109.143	7.60088	265.067	1.36615	0.00515397		3.763	261.45	8.3	232.65					265.009	1.06126	0.00400461
0.528	801.857	106.714	7.59068	265.225	1.38108	0.0052072		3.983	262.45	8.402	232.05					265.132	1.06742	0.004026
0.552	793	105.857	7.59838	265.106	1.38729	0.00523296		4.168	261.15	9.18	225.45					265.039	1.07635	0.00406109
0.576	785.429	105.143	7.5932	265.186	1.39197	0.00524902		5.002	255.25	10.36	215.85					265.102	1.07719	0.00406332
0.6	784.286	103.857	7.61335	264.874	1.40067	0.00528807		5.497	251.45	10.827	211.45					264.859	1.09478	0.00413345
0.624	774.286	104.571	7.61857	264.793	1.39776	0.0052787		5.6	250.65	11.324	210.05					264.796	1.09529	0.00413636
0.648	768.571	101.714	7.63633	264.519	1.41648	0.00535494		5.718	249.65	11.382	209.85					264.58	1.11949	0.0042312
0.672	771.857	99	7.64876	264.327	1.43384	0.00542448		5.763	249.25	11.74	210.45					264.428	1.1399	0.00431079
0.696	777.571	99.5714	7.66158	264.13	1.43027	0.00541503		5.99	248.05	12.161	211.55					264.271	1.14389	0.00432849
0.72	768.333	97.3333	7.6564	264.21	1.27478	0.00482486		6.036	247.65	13.54	215.25					264.335	1.01707	0.00384768
0.744	771	98.7778	7.63705	264.508	1.26532	0.00478367		6.903	240.35	13.753	216.05					264.571	1.00036	0.00378107
0.768	775	100.556	7.63752	264.501	1.25501	0.00474484		7.2	237.85	15.715	214.55					264.566	0.992439	0.0037512
0.792	781.222	102.111	7.62574	264.682	1.24541	0.00470529		8.398	227.85	16.08	214.25					264.709	0.9793	0.00369953
0.816	798	104.556	7.60098	265.065	1.22984	0.00463975		9.12	222.85							265.008	0.955419	0.00360524
0.84	819.556	110.556	7.59542	265.151	1.19781	0.00451745		10.149	215.05							265.075	0.927972	0.00350079
0.864	852.111	116.111	7.58929	265.246	1.16925	0.00440817		10.3	214.45							265.148	0.903076	0.00340593
0.888	892.444	120.444	7.60136	265.059	1.14786	0.00433057		11.123	209.25							265.004	0.891903	0.00336563
0.912	955.556	128.667	7.6145	264.856	1.11095	0.00419454		11.179	209.05							264.845	0.868819	0.00328048
0.936	1040	138.222	7.64123	264.443	1.07208	0.0040541		11.589	209.35							264.52	0.849276	0.00321063
0.96	1185.45	153	7.67286	263.956	0.921238	0.00349011		11.68	209.45							264.132	0.740624	0.002804
0.984	1307.73	167.091	7.72722	263.123	0.882891	0.00335543		11.899	209.05							263.453	0.727179	0.00276018
1.008	1458.45	183.727	7.80198	261.983	0.843871	0.00322109		12.061	210.15							262.499	0.716962	0.00273129
1.032	1631.73	207.818	7.87218	260.919	0.796354	0.00305211		12.469	212.75							261.583	0.695084	0.00265722
1.056	1817.18	228.727	7.94085	259.885	0.760957	0.00292806		12.576	213.45							260.669	0.68065	0.00261116
1.08	2019.73	253.091	7.99554	259.065	0.725114	0.00279897		13.47	214.25							259.929	0.660523	0.00254117
1.104	2254	281.364	8.02276	258.658	0.688492	0.00266179		14.322	217.05							259.557	0.632628	0.00243734
1.128	2522.55	309.091	8.04175	258.374	0.656838	0.00254219		15.201	216.75							259.295	0.607114	0.0023414
1.152	2812.27	343.727	8.04945	258.26	0.623022	0.00241239		16.03	216.45							259.189	0.577218	0.00222702
1.176	3118.09	381.091	8.06217	258.07	0.592074	0.00229424										259.013	0.550661	0.00212599
1.2	3465.31	426.462	8.06852	257.976	0.515205	0.00199711										258.925	0.48008	0.00185413
1.224	3794.08	471.462	8.06644	258.007	0.49021	0.00189999										258.954	0.456506	0.00176288
1.248	4127.69	513.692	8.06082	258.09	0.469532	0.00181925										259.032	0.436513	0.00168517
1.272	4477.38	558.077	8.03633	258.455	0.449955	0.00174094										259.37	0.415198	0.00160079
1.296	4813.38	602.308	8.00463	258.929	0.432532	0.00167047										259.805	0.395158	0.00152098
1.32	5162.62	644.154	7.97032	259.442	0.417487	0.00160917										260.271	0.377165	0.00144912
1.344	5532.23	695.231	7.93733	259.937	0.401393	0.00154419										260.716	0.358597	0.00137543
1.368	5917.23	744.385	7.90261	260.46	0.387317	0.00148705										261.18	0.341828	0.00130878
1.392	6292.23	797.308	7.8627	261.062	0.373725	0.00143156										261.708	0.325053	0.00124205
1.416	6655.62	849.692	7.81939	261.718	0.361495	0.00138124										262.274	0.30925	0.00117911
1.44	6988.73	895.467	7.77674	262.367	0.327301	0.00124749										262.824	0.275254	0.00104729
1.464	7337.4	945.2	7.72794	263.112	0.318043	0.00120878										263.444	0.262033	0.000994642
1.488	7669.73	1000.53	7.67931	263.857	0.308763	0.00117019										264.052	0.24896	0.000942846
1.512	8015.13	1055.13	7.62836	264.642	0.300255	0.00113457										264.677	0.236398	0.000893155
1.536	8346.33	1106	7.57969	265.395	0.292872	0.00110353										265.263	0.225109	0.000848624
1.56	8686.87	1154.8	7.5365	266.066	0.286246	0.00107584										265.773	0.215136	0.000809471
1.584	9007.73	1204.6	7.49374	266.734	0.279969	0.00104962										266.269	0.205576	0.000772059
1.608	9319.67	1255.6	7.45458	267.348	0.274003	0.00102489										266.715	0.196755	0.000737696
1.632	9642.33	1305	7.42306	267.843	0.268579	0.00100275										267.068	0.189289	0.000708769
1.656	9957.27	1353.53	7.39608	268.269	0.263576	0.000982505										267.365	0.182716	0.000683396
1.68	10249.9	1393.06	7.3723	268.646	0.243877	0.000907801										267.624	0.166542	0.0006223
1.704	10534.1	1436.29	7.34898	269.015	0.240065	0.000892383										267.875	0.16148	0.000602817
1.728	10808.7	1474.18	7.32743	269.358	0.236822	0.00087921										268.104	0.15703	0.000585707
1.752	11076.6	1513.41	7.31191	269.605	0.233658	0.000866668										268.267	0.153305	0.000571466
1.776	11340.5	1553.59	7.29939	269.805	0.230576	0.000854603										268.397	0.149979	0.000558793
1.8	11591.8	1591.24	7.28651	270.011	0.227782	0.000843603										268.531	0.146827	0.000546781
1.824	11843.9	1630.06	7.27253	270.235	0.225006	0.000832631										268.674	0.143599	0.000534471
1.848	12066.1	1666.41	7.26044	270.428	0.222515	0.000822826										268.797	0.140771	0.000523708
1.872	12279.4	1693.29	7.24654	270.651	0.220644	0.000815231										268.938	0.138166	0.000513746
1.896	12463.6	1718.88	7.23295	270.87	0.218922	0.000808218										269.074	0.1357	0.000504323
1.92	12597.4	1746.05	7.22249	271.038	0.205471	0.000758089										269.178	0.126355	0.000469411
1.944	12763.7	1771.74	7.21348	271.184	0.20395	0.000752073										269.267	0.124553	0.000462563
1.968	12898.6	1791.16	7.20491	271.322	0.202804	0.000747466										269.351	0.123032	0.000456771
1.992	13030.4	1815.05	7.19718	271.446	0.201465	0.000742191										269.426	0.12148	0.000450884
2.016	13146.2	1833.63	7.18733	271.606	0.200411	0.000737876										269.522	0.119903	0.000444872
2.04	13264.1	1846.21	7.17884	271.743	0.199662	0.000734745										269.604	0.118643	0.000440064
2.064	13352.4	1858.21	7.17255	271.845	0.198985	0.000731981										269.664	0.11764	0.000436247
2.088	13425.9	1872.05	7.16648	271.943	0.198244	0.000728989										269.722	0.116621	0.000432376
2.112	13469.7	1882.37	7.15994	272.049	0.197697	0.000726696										269.784	0.115675	0.000428769
2.136	13524.2	1893.26	7.15648	272.105	0.197133	0.000724472										269.817	0.115015	0.000426269
2.16	13515.3	1888.24	7.1538	272.149	0.187726	0.00068979										269.843	0.109283	0.000404986
2.184	13544.4	1895.48	7.15064	272.2	0.187373	0.000688363										269.872	0.10879	0.000403115
2.208	13546.8	1898.05	7.14904	272.226	0.187252	0.000687856										269.888	0.108574	0.000402293
2.232	13537.6	1898.86	7.14829	272.238	0.187222	0.000687714										269.895	0.108488	0.000401965
2.256	13535	1895.38	7.15136	272.189	0.187388	0.000688449										269.866	0.108864	0.000403401
2.28	13516.4	1893.05	7.15745	272.09	0.187531	0.000689225										269.808	0.109501	0.000405849
2.304	13486.1	1886.24	7.16354	271.991	0.18788	0.000690757										269.75	0.110258	0.000408741
2.328	13454.2	1877	7.17178	271.857	0.188348	0.000692819										269.672	0.111281	0.000412655
2.352	13417	1872.95	7.1809	271.71	0.188598	0.000694118										269.584	0.112255	0.000416402
2.376	13357.1	1857.86	7.19185	271.533	0.18937	0.000697412										269.478	0.113705	0.000421947
2.4	13271.4	1840.61	7.20453	271.328	0.181818	0.000670106										269.355	0.110267	0.000409376
2.424	13195.2	1826.43	7.21535	271.153	0.182549	0.00067323										269.248	0.111645	0.000414653
2.448	13115.4	1812.43	7.22483	271.001	0.183277	0.000676297										269.155	0.112908	0.000419491
2.472	13040.4	1801.78	7.2336	270.859	0.183856	0.000678787										269.067	0.114021	0.000423763
2.496	12946.2	1785.74	7.24314	270.706	0.184705	0.000682309										268.972	0.115369	0.000428927
2.52	12865	1767.04	7.25056	270.587	0.185667	0.000686164										268.897	0.11661	0.000433661
2.544	12755.1	1757.13	7.25733	270.478	0.186255	0.000688615										268.829	0.117564	0.000437319
2.568	12648.6	1743.65	7.26287	270.389	0.187008	0.000691625										268.773	0.118517	0.000440958
2.592	12533.1	1725.26	7.26809	270.306	0.188011	0.000695551										268.72	0.119605	0.000445094
2.616	12423.7	1709.26	7.27497	270.196	0.188917	0.000699185										268.649	0.120778	0.000449575
2.64	12276	1688.32	7.2824	270.077	0.182354	0.000675194										268.573	0.117203	0.000436391
2.664	12140.9	1666.6	7.28902	269.971	0.18355	0.000679888										268.505	0.118526	0.000441428
2.688	12015.2	1649.2	7.29726	269.839	0.184555	0.000683945										268.42	0.119866	0.000446563
2.712	11874.9	1628.08	7.3064	269.693	0.185781	0.000688861										268.324	0.121431	0.000452553
2.736	11733.8	1604.48	7.31615	269.538	0.187162	0.000694381										268.223	0.123155	0.000459154
2.76	11600.5	1582.28	7.32757	269.356	0.188501	0.000699821										268.102	0.125001	0.000466244
2.784	11458	1558.2	7.33837	269.184	0.189975	0.000705743										267.988	0.126893	0.000473502
2.808	11312.2	1539.12	7.3513	268.979	0.191224	0.000710925										267.85	0.128822	0.000480949
2.832	11159	1517.28	7.36373	268.781	0.192655	0.000716774										267.717	0.130841	0.000488728
2.856	11014.4	1494.16	7.37587	268.589	0.194181	0.000722968										267.586	0.132908	0.000496695
2.88	10872.8	1470.48	7.3875	268.405	0.188379	0.000701847										267.459	0.12989	0.000485643
2.904	10724.4	1451.22	7.39907	268.222	0.189696	0.000707234										267.333	0.131745	0.000492814
2.928	10578.1	1424.26	7.40919	268.062	0.191484	0.000714325										267.221	0.13382	0.000500783
2.952	10440.3	1406.63	7.42082	267.879	0.192755	0.00071956										267.093	0.135666	0.000507936
2.976	10296.6	1386.3	7.43357	267.678	0.19423	0.000725612										266.951	0.137755	0.000516033
3	10153	1364.44	7.44676	267.471	0.195838	0.000732185										266.803	0.139984	0.000524673
3.024	10016.4	1342.93	7.45958	267.269	0.197452	0.000738775										266.659	0.142197	0.000533256
3.048	9875.26	1322.93	7.47499	267.027	0.199026	0.00074534										266.484	0.144605	0.000542642
3.072	9736.26	1302.04	7.48991	266.794	0.200692	0.000752236										266.313	0.147049	0.000552165
3.096	9599.19	1280.78	7.50701	266.527	0.202436	0.000759534										266.116	0.14974	0.000562685
3.12	9481.24	1261.34	7.52657	266.221	0.196923	0.000739698										265.889	0.147219	0.000553685
3.144	9340.55	1239.62	7.54798	265.888	0.198756	0.00074752										265.639	0.150289	0.000565765
3.168	9204.55	1217.62	7.56911	265.559	0.200652	0.000755581										265.389	0.153395	0.000578002
3.192	9076.72	1195.69	7.59172	265.209	0.202594	0.000763906										265.119	0.156665	0.000590923
3.216	8948.07	1175.79	7.61521	264.845	0.204443	0.000771934										264.837	0.15994	0.000603919
3.24	8828.24	1155.14	7.63886	264.48	0.20639	0.000780361										264.549	0.163313	0.000617327
3.264	8710.79	1134.72	7.66236	264.118	0.208367	0.000788916										264.261	0.166706	0.000630839
3.288	8587.03	1116.48	7.68479	263.773	0.210218	0.000796965										263.984	0.169924	0.000643691
3.312	8472.28	1098.38	7.70588	263.449	0.212081	0.000805014										263.721	0.173055	0.000656204
3.336	8351.72	1079.59	7.72287	263.189	0.214025	0.000813199										263.508	0.175947	0.000667709
3.36	8244.1	1063.06	7.73931	262.938	0.208716	0.000793783										263.301	0.1728	0.000656285
3.384	8131.87	1045.87	7.75387	262.716	0.210516	0.000801309										263.116	0.175369	0.000666507
3.408	8021	1030.74	7.76579	262.534	0.212148	0.00080808										262.964	0.177609	0.000675412
3.432	7913.13	1015.61	7.77521	262.39	0.21379	0.000814779										262.844	0.179681	0.000683604
3.456	7807.42	1003.77	7.78347	262.264	0.215141	0.000820323										262.738	0.181428	0.00069053
3.48	7694.32	987.581	7.79114	262.148	0.216947	0.000827574										262.639	0.18352	0.000698753
3.504	7588.29	972.516	7.79805	262.043	0.218665	0.000834464										262.55	0.185489	0.000706488
3.528	7481.48	958.226	7.80264	261.973	0.220324	0.000841019										262.491	0.187238	0.000713314
3.552	7372.9	945.871	7.80927	261.872	0.221841	0.000847136										262.405	0.189025	0.000720356
3.576	7267.29	931.194	7.81525	261.781	0.223624	0.00085424										262.328	0.190994	0.000728075
3.6	7176.76	917.697	7.82452	261.641	0.21839	0.000834696										262.207	0.187202	0.000713947
3.624	7082.39	904.394	7.83501	261.482	0.220073	0.000841638										262.071	0.189412	0.000722751
3.648	6981.64	892.152	7.84654	261.307	0.221697	0.000848417										261.92	0.191653	0.000731725
3.672	6884.58	876.485	7.85821	261.13	0.223737	0.000856801										261.767	0.194271	0.000742153
3.696	6788.21	863.939	7.87311	260.905	0.2255	0.000864299										261.571	0.196892	0.000752729
3.72	6694.94	849.606	7.88771	260.685	0.227505	0.000872722										261.378	0.199709	0.000764062
3.744	6602.36	835.061	7.9002	260.496	0.229564	0.000881257										261.212	0.202428	0.000774955
3.768	6515.45	821.667	7.91245	260.312	0.231519	0.000889392										261.049	0.205045	0.000785465
3.792	6420.21	809	7.92397	260.138	0.233438	0.00089736										260.895	0.207584	0.000795661
3.816	6333.27	795.758	7.93295	260.003	0.235432	0.000905496										260.775	0.210012	0.00080534
3.84	6251.94	784.943	7.94155	259.874	0.230258	0.000886038										260.66	0.206007	0.00079033
3.864	6160	774.086	7.94764	259.783	0.231945	0.000892844										260.578	0.207949	0.000798031
3.888	6071.34	762.171	7.95139	259.726	0.233779	0.000900099										260.527	0.209861	0.000805525
3.912	5988.37	753.029	7.95346	259.695	0.235239	0.000905828										260.499	0.21132	0.000811212
3.936	5906.91	742.686	7.95487	259.674	0.236886	0.000912242										260.48	0.2129	0.000817338
3.96	5823.94	732.4	7.95549	259.665	0.238553	0.000918696										260.472	0.214444	0.00082329
3.984	5741.86	722.514	7.95536	259.667	0.240186	0.000924978										260.474	0.215903	0.000828885
4.008	5657.2	711.8	7.95689	259.644	0.242003	0.000932059										260.453	0.217648	0.000835653
4.032	5579.34	701.6	7.95617	259.654	0.24374	0.000938709										260.463	0.219157	0.000841415
4.056	5501.97	691.943	7.95628	259.653	0.245438	0.000945253										260.461	0.220692	0.000847313
4.08	5432.78	682.027	7.95673	259.646	0.240422	0.000925962										260.455	0.216215	0.000830145
4.104	5355.3	672.486	7.95664	259.647	0.242124	0.000932512										260.456	0.217739	0.000835991
4.128	5287.14	663	7.95821	259.624	0.24385	0.000939242										260.435	0.219407	0.000842462
4.152	5212.03	654.946	7.96395	259.538	0.24544	0.00094568										260.358	0.221264	0.000849845
4.176	5140.84	646.351	7.97116	259.43	0.247159	0.0009527										260.26	0.22335	0.00085818
4.2	5069.51	637	7.97678	259.345	0.249025	0.000960205										260.184	0.225455	0.000866523
4.224	4998.05	628.622	7.98297	259.253	0.250767	0.000967269										260.1	0.227496	0.000874648
4.248	4924.11	618.27	7.98933	259.158	0.252911	0.000975898										260.013	0.229918	0.000884255
4.272	4858.49	606.486	7.99731	259.038	0.255373	0.00098585										259.905	0.232758	0.00089555
4.296	4796.84	597.243	8.00726	258.889	0.25743	0.000994361										259.769	0.235383	0.000906125
4.32	4737.69	591.231	8.0202	258.696	0.252207	0.000974915										259.592	0.231556	0.000892001
4.344	4678.33	582.333	8.03196	258.52	0.254239	0.000983438										259.43	0.234282	0.000903064
4.368	4616.08	574.615	8.04528	258.322	0.256113	0.000991447										259.247	0.236981	0.000914113
4.392	4556.69	565.179	8.05919	258.115	0.258372	0.001001										259.055	0.240085	0.000926774
4.416	4498.9	557.667	8.06854	257.975	0.260222	0.00100871										258.925	0.242484	0.000936501
4.44	4439.31	548.333	8.07763	257.84	0.262499	0.00101807										258.799	0.245266	0.000947711
4.464	4380.46	541.615	8.08983	257.659	0.264304	0.00102579										258.629	0.247838	0.000958276
4.488	4318.38	533.308	8.09798	257.538	0.266451	0.00103461										258.516	0.250443	0.000968774
4.512	4264.74	525.385	8.10577	257.422	0.268526	0.00104313										258.407	0.25296	0.00097892
4.536	4205.62	518.333	8.11186	257.332	0.27044	0.00105094										258.322	0.255205	0.000987936
4.56	4154.27	510.878	8.11885	257.228	0.265745	0.00103311										258.224	0.251272	0.000973079
4.584	4099.34	503.146	8.12319	257.164	0.267813	0.00104141										258.163	0.253537	0.000982083
4.608	4040.54	497.39	8.12924	257.074	0.269489	0.00104829										258.078	0.255556	0.000990227
4.632	3983.66	490.659	8.13433	256.999	0.271413	0.00105609										258.006	0.257745	0.000998988
4.656	3929.83	483.415	8.14038	256.909	0.273509	0.00106461										257.921	0.26017	0.00100872
4.68	3880.63	476.488	8.14835	256.791	0.275581	0.00107317										257.809	0.262715	0.00101903
4.704	3832.37	470.585	8.15564	256.683	0.277415	0.00108077										257.706	0.264987	0.00102825
4.728	3781.41	463.732	8.16324	256.571	0.279554	0.00108958										257.598	0.267578	0.00103874
4.752	3734.41	458.024	8.17689	256.369	0.281504	0.00109804										257.405	0.270425	0.00105058
4.776	3686.56	450.463	8.19086	256.163	0.284019	0.00110874										257.207	0.273842	0.00106468
4.8	3644.09	444.326	8.20687	255.927	0.279464	0.00109197										256.979	0.270563	0.00105286
4.824	3599.26	438.302	8.22454	255.667	0.281641	0.00110159										256.726	0.273889	0.00106685
4.848	3549.88	431.279	8.24327	255.391	0.284195	0.00111278										256.457	0.277656	0.00108266
4.872	3506.44	423.814	8.2635	255.094	0.286946	0.00112486										256.166	0.281717	0.00109974
4.896	3459.53	418.186	8.2852	254.776	0.289243	0.00113529										255.853	0.285428	0.0011156
4.92	3417.79	411.512	8.30374	254.504	0.291842	0.00114671										255.584	0.289223	0.00113162
4.944	3372.84	404.488	8.32219	254.234	0.294632	0.0011589										255.316	0.293203	0.00114839
4.968	3330.23	398.837	8.34197	253.944	0.297052	0.00116975										255.027	0.296899	0.00116419
4.992	3288.21	392.535	8.35907	253.695	0.299695	0.00118132										254.777	0.300642	0.00118002
5.016	3246.74	386.884	8.3739	253.478	0.302129	0.00119193										254.56	0.304031	0.00119434
5.04	3208.44	382.511	8.38933	253.253	0.297321	0.00117401										254.333	0.300149	0.00118014
5.064	3169.38	377.111	8.40142	253.077	0.299644	0.001184										254.155	0.303236	0.00119312
5.088	3131.82	371.533	8.41225	252.919	0.302048	0.00119425										253.995	0.306332	0.00120606
5.112	3090	367.022	8.42359	252.754	0.304143	0.00120332										253.828	0.309148	0.00121794
5.136	3050.69	361.6	8.43271	252.621	0.306565	0.00121353										253.692	0.312163	0.00123048
5.16	3014.16	357.022	8.43868	252.535	0.308634	0.00122215										253.604	0.314631	0.00124064
5.184	2979.13	353.044	8.44634	252.423	0.310533	0.00123021										253.491	0.317031	0.00125066
5.208	2941.96	347.844	8.45753	252.261	0.313042	0.00124095										253.324	0.320267	0.00126426
5.232	2908.29	343.178	8.46724	252.12	0.315335	0.00125073										253.18	0.323196	0.00127655
5.256	2871.71	338.756	8.47821	251.961	0.317617	0.00126058										253.017	0.326191	0.00128921
5.28	2838.89	335.66	8.4893	251.8	0.312489	0.00124102										252.851	0.321569	0.00127177
5.304	2803.55	330.915	8.4998	251.648	0.31492	0.00125143										252.695	0.324676	0.00128485
5.328	2770.89	324.936	8.5147	251.432	0.318022	0.00126485										252.472	0.328731	0.00130205
5.352	2736.85	320.617	8.52746	251.247	0.320425	0.00127534										252.28	0.331941	0.00131576
5.376	2700.57	316.234	8.53849	251.087	0.322881	0.00128593										252.115	0.335109	0.00132919
5.4	2667.55	311.681	8.55196	250.892	0.325504	0.00129738										251.913	0.338588	0.00134407
5.424	2634.21	307.809	8.56977	250.635	0.327964	0.00130853										251.645	0.342134	0.00135959
5.448	2602.13	302.489	8.58638	250.395	0.331144	0.00132248										251.394	0.346361	0.00137776
5.472	2567.51	298.617	8.59841	250.222	0.333586	0.00133316										251.212	0.349566	0.00139152
5.496	2536.34	295.064	8.60955	250.061	0.335868	0.00134314										251.044	0.352555	0.00140436
5.52	2509.65	290.959	8.62132	249.891	0.331484	0.00132652										250.865	0.348567	0.00138946
5.544	2480.02	286.592	8.632	249.737	0.334211	0.00133825										250.703	0.351987	0.001404
5.568	2449.35	283	8.6469	249.523	0.3367	0.00134938										250.477	0.355372	0.00141878
5.592	2418.73	279.306	8.65807	249.362	0.339197	0.00136026										250.307	0.358572	0.00143253
5.616	2390.51	276.082	8.66941	249.199	0.34147	0.00137027										250.135	0.361545	0.0014454
5.64	2363.9	272.673	8.68072	249.036	0.343875	0.00138083										249.962	0.364654	0.00145883
5.664	2336.69	269.327	8.69124	248.885	0.346274	0.0013913										249.802	0.367715	0.00147203
5.688	2312.37	265.122	8.7022	248.727	0.349213	0.001404										249.634	0.371371	0.00148766
5.712	2287.24	262.143	8.71209	248.585	0.351459	0.00141384										249.483	0.374238	0.00150005
5.736	2260.45	259.143	8.72624	248.382	0.353889	0.00142478										249.267	0.377502	0.00151445
5.76	2236.84	256.51	8.74274	248.145	0.349123	0.00140693										249.014	0.373177	0.00149862
5.784	2211.84	253.039	8.75984	247.9	0.351952	0.00141974										248.751	0.376974	0.00151546
5.808	2185.43	249.078	8.77746	247.647	0.355183	0.00143423										248.48	0.381215	0.00153418
5.832	2158.63	246.314	8.78934	247.477	0.357543	0.00144475										248.298	0.384264	0.00154759
5.856	2132.65	241.922	8.80216	247.294	0.361052	0.00146001										248.1	0.388584	0.00156624
5.88	2109.86	238.667	8.81496	247.11	0.363844	0.0014724										247.903	0.392131	0.00158179
5.904	2085.14	235.412	8.82717	246.936	0.366694	0.00148498										247.714	0.39571	0.00159745
5.928	2059.92	232.235	8.83967	246.757	0.36956	0.00149767										247.521	0.399316	0.00161326
5.952	2034.86	229.863	8.84707	246.651	0.371736	0.00150713										247.407	0.401967	0.00162472
5.976	2012.98	227.039	8.85634	246.518	0.37431	0.00151839										247.263	0.405122	0.00163842
6	1993.13	224.868	8.86	246.466	0.369071	0.00149745										247.207	0.399595	0.00161644
6.024	1968.57	222.321	8.862	246.437	0.371263	0.00150652										247.176	0.402046	0.00162656
6.048	1946.42	219.226	8.86184	246.44	0.373818	0.00151687										247.178	0.404806	0.00163771
6.072	1922.81	217.132	8.86272	246.427	0.375694	0.00152457										247.165	0.406873	0.00164616
6.096	1901.94	214.528	8.86781	246.354	0.378113	0.00153483										247.086	0.409693	0.0016581
6.12	1878.58	212.132	8.87181	246.297	0.380397	0.00154446										247.024	0.412325	0.00166917
6.144	1858.23	209.679	8.8758	246.24	0.382735	0.00155432										246.962	0.415016	0.00168049
6.168	1835.79	207.302	8.88265	246.142	0.38517	0.00156483										246.856	0.417923	0.00169298
6.192	1814.79	204.377	8.89	246.037	0.388114	0.00157746										246.742	0.421403	0.00170787
6.216	1794.98	201.491	8.90511	245.821	0.391346	0.00159199										246.507	0.425488	0.00172607
6.24	1776.55	199.382	8.92274	245.57	0.386799	0.00157511										246.233	0.421187	0.00171052
6.264	1755.58	197.091	8.942	245.295	0.389729	0.00158882										245.934	0.425055	0.00172833
6.288	1735.65	194.364	8.9601	245.036	0.393058	0.00160408										245.652	0.4293	0.00174759
6.312	1716.45	191.582	8.97806	244.78	0.396498	0.00161981										245.372	0.433646	0.0017673
6.336	1699.36	188.364	8.99393	244.554	0.40033	0.00163698										245.124	0.438339	0.00178823
6.36	1679.98	185.436	9.00903	244.339	0.403972	0.00165333										244.889	0.44279	0.00180813
6.384	1660.04	183.073	9.02666	244.088	0.407243	0.00166843										244.613	0.446896	0.00182695
6.408	1641.75	181.182	9.05053	243.747	0.410329	0.00168342										244.24	0.450951	0.00184635
6.432	1623	179.273	9.07385	243.415	0.413478	0.00169865										243.874	0.455024	0.00186581
6.456	1605.55	177.327	9.09642	243.094	0.416681	0.00171407										243.52	0.459099	0.00188526
6.48	1590.75	175.298	9.11539	242.824	0.412416	0.00169842										243.223	0.454826	0.00187
6.504	1572.63	172.737	9.13114	242.6	0.416069	0.00171504										242.975	0.459187	0.00188985
6.528	1557.3	169.825	9.14817	242.357	0.420215	0.00173387										242.708	0.464103	0.00191219
6.552	1538.98	167.526	9.16801	242.075	0.423934	0.00175125										242.396	0.468578	0.00193311
6.576	1522.33	165.333	9.18689	241.806	0.427547	0.00176814										242.099	0.472893	0.00195331
6.6	1504.23	162.965	9.20633	241.529	0.431495	0.00178651										241.792	0.47756	0.00197508
6.624	1487.14	161.07	9.2271	241.234	0.435006	0.00180325										241.465	0.481732	0.00199504
6.648	1471.21	158.965	9.24594	240.966	0.43874	0.00182076										241.168	0.486097	0.00201559
6.672	1455.91	156.895	9.2575	240.801	0.442139	0.00183612										240.986	0.489988	0.00203326
6.696	1439.67	155.456	9.26697	240.666	0.444698	0.00184778										240.837	0.492918	0.00204669
6.72	1425.54	153.814	9.27475	240.556	0.439794	0.00182824										240.714	0.487554	0.00202545
6.744	1410.75	151.644	9.28109	240.466	0.443167	0.00184295										240.614	0.491347	0.00204206
6.768	1394.36	149.746	9.28985	240.341	0.446395	0.00185734										240.475	0.494995	0.0020584
6.792	1378.19	148.237	9.29854	240.217	0.449142	0.00186974										240.338	0.498104	0.00207251
6.816	1363.37	146.746	9.30417	240.137	0.451728	0.00188112										240.25	0.501008	0.00208537
6.84	1348.78	145.136	9.31432	239.992	0.454757	0.00189488										240.089	0.504427	0.002101
6.864	1333.69	143.407	9.3255	239.833	0.458072	0.00190996										239.912	0.50816	0.0021181
6.888	1321.44	141.644	9.33483	239.7	0.46135	0.0019247										239.765	0.511833	0.00213473
6.912	1306.22	139.695	9.34359	239.576	0.464989	0.00194088										239.627	0.515898	0.00215292
6.936	1290.69	138.169	9.35567	239.404	0.468245	0.00195588										239.436	0.519537	0.00216984
6.96	1279.44	136.508	9.37148	239.178	0.464106	0.00194042										239.186	0.514959	0.00215296
6.984	1265.48	134.754	9.38603	238.971	0.467901	0.00195798										238.956	0.519161	0.00217262
7.008	1251.41	133.049	9.40294	238.73	0.471834	0.00197643										238.689	0.52349	0.00219319
7.032	1238.28	131.623	9.4169	238.531	0.475202	0.0019922										238.468	0.527176	0.00221068
7.056	1224.98	129.902	9.43057	238.336	0.479106	0.00201021										238.251	0.53144	0.00223058
7.08	1211.31	127.984	9.44745	238.095	0.483631	0.00203125										237.984	0.536349	0.00225372
7.104	1198.41	126.77	9.46206	237.887	0.486878	0.00204668										237.753	0.539831	0.00227055
7.128	1184.82	124.902	9.47603	237.687	0.491312	0.00206705										237.532	0.544614	0.0022928
7.152	1172.15	123.607	9.48756	237.523	0.49463	0.00208245										237.35	0.548166	0.00230953
7.176	1159.43	122.033	9.50029	237.341	0.498598	0.00210077										237.148	0.552408	0.00232938
7.2	1149.29	120.635	9.51228	237.17	0.494176	0.00208364										236.958	0.547347	0.00230989
7.224	1137.81	119.349	9.5213	237.041	0.497413	0.00209843										236.816	0.550802	0.00232587
7.248	1124.14	117.778	9.53366	236.864	0.501527	0.00211736										236.62	0.555162	0.00234622
7.272	1113.17	116.778	9.54504	236.701	0.504478	0.00213129										236.44	0.558235	0.002361
7.296	1101.63	115.381	9.55994	236.488	0.50852	0.0021503										236.204	0.562431	0.00238112
7.32	1090.52	114.048	9.57536	236.267	0.512541	0.00216932										235.96	0.566564	0.0024011
7.344	1078.13	112.73	9.59012	236.056	0.516587	0.00218841										235.727	0.570712	0.00242108
7.368	1065.79	111.143	9.60866	235.79	0.521564	0.00221198										235.433	0.575765	0.00244556
7.392	1055.1	109.778	9.62369	235.575	0.52587	0.00223229										235.195	0.580128	0.00246658
7.416	1044.3	108.254	9.64195	235.313	0.530869	0.00225601										234.906	0.585129	0.0024909
7.44	1034.6	106.985	9.66068	235.044	0.527115	0.00224262										234.61	0.580432	0.00247403
7.464	1023.34	105.615	9.67984	234.768	0.531986	0.002266										234.307	0.585178	0.00249749
7.488	1012.25	103.954	9.69923	234.49	0.537666	0.00229292										234	0.590754	0.00252459
7.512	1001.62	103.154	9.71638	234.243	0.541234	0.00231057										233.729	0.59404	0.00254158
7.536	991.6	101.877	9.73565	233.965	0.546181	0.00233446										233.424	0.598712	0.00256491
7.56	980.631	100.538	9.75203	233.729	0.551165	0.00235814										233.166	0.603491	0.00258825
7.584	970.662	99.3231	9.76664	233.518	0.555763	0.00237996										232.935	0.607884	0.00260968
7.608	961.462	98.3385	9.78117	233.308	0.559829	0.00239953										232.705	0.611665	0.0026285
7.632	951.631	97.3231	9.79126	233.162	0.563659	0.00241746										232.546	0.615368	0.00264622
7.656	942.723	95.9692	9.80421	232.974	0.5687	0.00244104										232.341	0.620231	0.00266948
7.68	934.582	95.1045	9.81398	232.833	0.563583	0.00242054										232.187	0.614159	0.0026451
7.704	924.582	94.0448	9.82087	232.733	0.567384	0.00243792										232.078	0.617946	0.00266266
7.728	915.97	93	9.83071	232.59	0.571451	0.0024569										231.923	0.621852	0.00268129
7.752	907.09	92.1045	9.84321	232.409	0.57543	0.00247593										231.726	0.625498	0.0026993
7.776	897.448	91.0896	9.85713	232.207	0.579984	0.0024977										231.506	0.629658	0.00271983
7.8	886.985	90.1343	9.86284	232.124	0.583651	0.00251439										231.416	0.633305	0.00273665
7.824	877.478	89.2687	9.86945	232.028	0.587169	0.0025306										231.312	0.63673	0.00275269
7.848	868.94	87.9403	9.87721	231.915	0.592238	0.00255369										231.19	0.641754	0.00277588
7.872	860.194	86.7612	9.88533	231.797	0.596997	0.00257552										231.062	0.646405	0.00279754
7.896	851.119	85.7015	9.89624	231.638	0.601778	0.00259792										230.89	0.650882	0.00281901
7.92	843.609	85.3333	9.9044	231.519	0.595249	0.00257106										230.761	0.643293	0.0027877
7.944	833.71	84.2174	9.91195	231.409	0.599945	0.00259257										230.643	0.647869	0.00280897
7.968	824.957	83.1884	9.9193	231.302	0.604388	0.00261298										230.527	0.652169	0.00282904
7.992	816.246	82.1304	9.92229	231.258	0.608533	0.0026314										230.48	0.656436	0.00284813
8.016	807.594	81.0145	9.92243	231.256	0.612641	0.00264918										230.477	0.660858	0.00286734
8.04	798.681	80.3333	9.92094	231.278	0.615142	0.00265975										230.501	0.66366	0.00287921
8.064	790.594	79.6667	9.92015	231.29	0.617676	0.00267057										230.513	0.666449	0.00289115
8.088	781.638	78.8696	9.91778	231.324	0.620564	0.00268266										230.551	0.669731	0.00290492
8.112	774.435	78.1159	9.91686	231.338	0.623438	0.00269493										230.565	0.672897	0.00291847
8.136	767.13	77.3623	9.91438	231.374	0.626184	0.00270637										230.604	0.676034	0.00293158
8.16	760.225	76.6761	9.91279	231.397	0.619886	0.00267889										230.629	0.669345	0.00290225
8.184	752.211	76.1549	9.91242	231.402	0.622071	0.00268827										230.635	0.671729	0.00291252
8.208	743.845	75.338	9.91828	231.317	0.6261	0.00270668										230.543	0.675669	0.00293078
8.232	736.014	74.2958	9.92478	231.222	0.631113	0.00272947										230.44	0.680616	0.00295354
8.256	728.817	73.5352	9.93388	231.089	0.635395	0.00274957										230.297	0.684571	0.00297255
8.28	721.662	72.5211	9.9427	230.96	0.640729	0.0027742										230.158	0.689658	0.00299645
8.304	713.859	71.831	9.95265	230.815	0.645009	0.00279449										230.002	0.693504	0.00301521
8.328	707.901	70.8732	9.9659	230.621	0.650792	0.00282191										229.793	0.698676	0.00304045
8.352	701.831	70.3099	9.97901	230.429	0.65501	0.00284257										229.587	0.70214	0.00305827
8.376	694.775	69.3803	9.98617	230.323	0.660175	0.0028663										229.475	0.707079	0.00308129
8.4	688.986	68.8082	9.99957	230.127	0.655433	0.00284814										229.264	0.700871	0.00305705
8.424	682.603	68.0959	10.0059	230.034	0.659611	0.00286745										229.165	0.704797	0.0030755
8.448	675.808	67.4247	10.0146	229.906	0.664002	0.00288815										229.028	0.708721	0.00309447
8.472	668.849	66.7671	10.0153	229.895	0.66737	0.00290293										229.017	0.712254	0.00311005
8.496	662.178	66.3151	10.0162	229.882	0.669856	0.00291391										229.003	0.714826	0.00312147
8.52	656.562	65.274	10.016	229.885	0.674929	0.00293595										229.006	0.720256	0.00314515
8.544	649.397	64.8082	10.0163	229.882	0.677496	0.00294715										229.002	0.722975	0.00315707
8.568	642.466	64.0274	10.0198	229.829	0.682041	0.0029676										228.946	0.7275	0.0031776
8.592	635.356	63.5616	10.0258	229.741	0.685452	0.00298359										228.852	0.730582	0.00319238
8.616	628.945	62.9452	10.0355	229.597	0.690121	0.00300579										228.699	0.73464	0.00321225
8.64	624.08	62.3333	10.0484	229.408	0.685855	0.00298967										228.498	0.728877	0.00318986
8.664	617.76	61.68	10.0544	229.319	0.690295	0.00301019										228.404	0.733005	0.00320925
8.688	611.853	60.8	10.0674	229.127	0.696927	0.00304165										228.2	0.738751	0.00323729
8.712	606.293	60.0933	10.0824	228.905	0.703069	0.00307145										227.964	0.74371	0.0032624
8.736	599.92	59.2533	10.0986	228.665	0.710268	0.00310615										227.711	0.749604	0.0032919
8.76	593.667	58.6267	10.1158	228.409	0.716613	0.00313741										227.441	0.754398	0.00331689
8.784	588.2	58.0933	10.1307	228.187	0.72216	0.00316477										227.208	0.758542	0.00333854
8.808	582.947	57.36	10.1452	227.971	0.728886	0.00319727										226.982	0.763909	0.00336551
8.832	576.907	56.56	10.1553	227.822	0.735491	0.00322836										226.825	0.769623	0.00339303
8.856	571.48	56.1733	10.1615	227.729	0.739093	0.00324549										226.728	0.772636	0.00340777
8.88	567.143	55.7013	10.166	227.662	0.733206	0.00322059										226.658	0.765932	0.00337924
8.904	561.922	55.2208	10.1704	227.595	0.737131	0.00323879										226.588	0.769478	0.00339594
8.928	556.844	54.7273	10.1765	227.505	0.741432	0.00325898										226.494	0.773211	0.00341383
8.952	551.104	54.1688	10.1773	227.492	0.745387	0.00327654										226.48	0.777228	0.00343177
8.976	546.247	53.7792	10.175	227.527	0.747753	0.00328644										226.517	0.779991	0.00344341
9	541.078	53.1818	10.1775	227.49	0.752294	0.00330694										226.478	0.784413	0.00346352
9.024	536.532	52.7273	10.1783	227.478	0.755662	0.00332192										226.465	0.787819	0.00347876
9.048	531.675	52.1688	10.1804	227.445	0.760003	0.00334148										226.432	0.792066	0.00349804
9.072	526.052	51.7143	10.1823	227.418	0.76371	0.00335818										226.403	0.79569	0.00351448
9.096	521	51.2078	10.183	227.407	0.767591	0.0033754										226.392	0.799641	0.00353211
9.12	517.139	50.6962	10.1909	227.288	0.762882	0.00335645										226.268	0.793692	0.00350775
9.144	511.481	50.1899	10.2022	227.118	0.7687	0.00338458										226.092	0.798228	0.00353055
9.168	507.266	49.7342	10.2106	226.993	0.773639	0.0034082										225.962	0.802217	0.00355024
9.192	502.785	49.3165	10.2165	226.905	0.777964	0.00342859										225.87	0.805885	0.00356792
9.216	498.127	48.9241	10.2282	226.727	0.783234	0.00345452										225.686	0.809679	0.00358763
9.24	493.684	48.1899	10.2403	226.546	0.791159	0.00349227										225.499	0.816128	0.00361921
9.264	488.861	47.4684	10.2489	226.416	0.798569	0.003527										225.365	0.822493	0.00364961
9.288	484.38	47.1772	10.2575	226.285	0.802766	0.00354758										225.231	0.825515	0.0036652
9.312	479.835	46.7848	10.2658	226.16	0.807742	0.00357154										225.102	0.829367	0.0036844
9.336	475.582	46.1646	10.2764	225.999	0.815062	0.00360649										224.937	0.835215	0.00371311
9.36	472.062	45.8025	10.288	225.823	0.810366	0.0035885										224.756	0.828569	0.00368652
9.384	467.37	45.3951	10.2949	225.718	0.815394	0.00361244										224.65	0.832607	0.00370624
9.408	462.481	44.963	10.3	225.64	0.820368	0.00363574										224.57	0.836849	0.00372645
9.432	458.235	44.5309	10.3083	225.515	0.825999	0.00366273										224.442	0.841229	0.00374809
9.456	453.864	44.0123	10.3189	225.353	0.832959	0.00369624										224.278	0.846532	0.00377448
9.48	449.667	43.6173	10.3266	225.236	0.838347	0.00372208										224.159	0.850687	0.00379502
9.504	445.037	43.1235	10.3349	225.108	0.844872	0.00375318										224.029	0.85585	0.00382026
9.528	440.926	42.5802	10.3455	224.946	0.852415	0.00378942										223.865	0.861599	0.00384875
9.552	436.951	42.1852	10.3595	224.732	0.859474	0.00382444										223.649	0.866185	0.00387297
9.576	433.346	41.7778	10.3753	224.488	0.867187	0.00386296										223.403	0.870984	0.00389871
9.6	429.976	41.3976	10.3907	224.25	0.864075	0.00385318										223.165	0.864924	0.00387572
9.624	425.952	40.9639	10.4111	223.935	0.87337	0.0039001										222.851	0.870235	0.00390501
9.648	421.759	40.506	10.4298	223.645	0.882772	0.00394721										222.562	0.875801	0.00393509
9.672	417.578	40	10.4446	223.414	0.891919	0.00399222										222.333	0.881778	0.00396602
9.696	413.675	39.5301	10.4589	223.191	0.900754	0.0040358										222.113	0.887441	0.00399545
9.72	409.675	39.0843	10.4724	222.981	0.909318	0.00407801										221.906	0.892917	0.00402385
9.744	405.458	38.494	10.4842	222.794	0.919242	0.00412597										221.724	0.89998	0.00405902
9.768	401.639	38.1566	10.4934	222.65	0.925824	0.00415821										221.582	0.904308	0.00408114
9.792	397.53	37.7952	10.5036	222.49	0.933079	0.0041938										221.426	0.909016	0.00410527
9.816	393.88	37.4578	10.5104	222.382	0.939204	0.00422338										221.321	0.913354	0.00412682
9.84	390.247	37.0941	10.5161	222.291	0.934227	0.00420271										221.233	0.907141	0.00410038
9.864	386.906	36.7882	10.5246	222.157	0.940534	0.00423364										221.103	0.911213	0.00412121
9.888	383.412	36.5176	10.5309	222.058	0.945893	0.00425966										221.007	0.914867	0.00413954
9.912	379.6	36.0706	10.5397	221.919	0.954227	0.00429989										220.872	0.92073	0.00416861
9.936	376.424	35.8	10.5547	221.68	0.962367	0.00434125										220.642	0.924752	0.00419118
9.96	372.941	35.4235	10.574	221.371	0.97339	0.0043971										220.346	0.930252	0.00422178
9.984	369.129	34.9059	10.5942	221.047	0.986839	0.00446438										220.038	0.93761	0.00426113
10.008	365.576	34.4824	10.6121	220.758	0.998719	0.00452405										219.763	0.943829	0.00429475
10.032	362.424	34.1176	10.631	220.452	1.0104	0.00458329										219.476	0.949378	0.00432566
10.056	359.329	33.6353	10.6487	220.164	1.02362	0.00464934										219.206	0.95648	0.00436339
10.08	356.368	33.2184	10.6651	219.897	1.02383	0.00465597										218.957	0.951661	0.00434635
10.104	352.885	32.8506	10.6783	219.681	1.03437	0.00470852										218.756	0.957313	0.00437616
10.128	349.897	32.6552	10.6933	219.433	1.04329	0.00475446										218.528	0.960717	0.00439632
10.152	346.678	32.3793	10.7069	219.208	1.05307	0.00480398										218.321	0.965224	0.00442113
10.176	343.609	32.0575	10.7237	218.929	1.06504	0.00486479										218.066	0.970487	0.00445044
10.2	340.759	31.8621	10.7384	218.685	1.07443	0.00491315										217.844	0.973955	0.00447088
10.224	336.874	31.5632	10.7468	218.544	1.08318	0.00495633										217.716	0.978871	0.00449609
10.248	333.448	31.046	10.7579	218.358	1.09667	0.00502238										217.548	0.987027	0.00453705
10.272	330.092	30.7011	10.7773	218.03	1.11143	0.0050976										217.255	0.993027	0.0045708
10.296	326.966	30.2529	10.7984	217.673	1.12919	0.00518757										216.937	1.00068	0.00461279
10.32	324.337	29.9101	10.8251	217.216	1.13554	0.00522768										216.534	0.995553	0.00459767
10.344	321.348	29.6966	10.8509	216.77	1.15281	0.00531811										216.145	0.999828	0.00462572
10.368	318.36	29.3034	10.8838	216.197	1.17803	0.0054489										215.651	1.00709	0.00467001
10.392	315.449	28.8652	10.906	215.806	1.19931	0.00555737										215.319	1.01494	0.00471367
10.416	312.056	28.5281	10.9302	215.375	1.2209	0.00566869										214.957	1.02139	0.00475161
10.44	308.843	28.0449	10.9519	214.986	1.24479	0.0057901										214.633	1.0303	0.0048003
10.464	305.685	27.8427	10.9717	214.628	1.26259	0.00588269										214.338	1.03455	0.00482673
10.488	302.899	27.4494	10.9903	214.288	1.28431	0.00599341										214.061	1.04207	0.0048681
10.512	300.157	27.3258	11.0037	214.042	1.29711	0.00606004										213.862	1.04486	0.00488569
10.536	297.742	27.0225	11.0136	213.858	1.31163	0.0061332										213.714	1.05076	0.00491665
10.56	295.462	26.7473	11.0178	213.78	1.30684	0.00611301										213.651	1.04444	0.00488853
10.584	292.692	26.4615	11.016	213.814	1.31241	0.00613808										213.679	1.04997	0.00491381
10.608	289.824	26.2857	11.0201	213.738	1.32006	0.00617607										213.618	1.05369	0.00493259
10.632	286.648	26.033	11.0237	213.671	1.32933	0.00622138										213.565	1.05892	0.0049583
10.656	283.835	25.7143	11.0367	213.428	1.34771	0.00631456										213.372	1.06557	0.00499397
10.68	281.505	25.6264	11.0455	213.262	1.3575	0.00636539										213.241	1.06776	0.00500731
10.704	279.033	25.3846	11.0511	213.156	1.36861	0.0064207										213.157	1.0729	0.00503338
10.728	276.44	25.0769	11.0522	213.136	1.37771	0.00646399										213.142	1.07935	0.00506401
10.752	274.187	24.7582	11.058	213.025	1.39127	0.00653101										213.055	1.08617	0.00509804
10.776	271.209	24.3736	11.0653	212.888	1.40828	0.00661512										212.948	1.09461	0.00514025
10.8	268.925	24.1935	11.0712	212.775	1.40353	0.00659631										212.861	1.08694	0.00510633
10.824	266.484	23.9892	11.0804	212.599	1.41785	0.00666915										212.725	1.09173	0.00513213
10.848	263.839	23.828	11.0887	212.439	1.43055	0.00673396										212.602	1.09569	0.00515375
10.872	261.032	23.5376	11.0977	212.264	1.44789	0.00682121										212.468	1.1025	0.00518901
10.896	258.065	23.2688	11.1066	212.091	1.46494	0.00690712										212.337	1.10898	0.00522274
10.92	255.731	23.0323	11.1103	212.019	1.47606	0.00696189										212.283	1.11466	0.00525084
10.944	253.194	22.8387	11.1196	211.837	1.49193	0.0070428										212.146	1.11958	0.00527743
10.968	250.634	22.6129	11.1281	211.67	1.50829	0.00712565										212.021	1.12529	0.00530746
10.992	248.419	22.3333	11.1433	211.367	1.5342	0.00725843										211.796	1.13236	0.00534647
11.016	245.667	21.9892	11.1599	211.036	1.56492	0.00741543										211.553	1.1412	0.00539442
11.04	243.453	21.8	11.1747	210.735	1.57284	0.0074636										211.335	1.13423	0.00536696
11.064	240.537	21.4421	11.1868	210.489	1.60075	0.00760492										211.158	1.14359	0.00541581
11.088	238.063	21.2526	11.1994	210.23	1.62437	0.00772662										210.974	1.1489	0.00544568
11.112	235.937	20.9895	11.2161	209.88	1.65731	0.00789645										210.728	1.1561	0.00548622
11.136	233.863	20.7474	11.2265	209.661	1.68178	0.00802144										210.576	1.16281	0.00552205
11.16	231.474	20.5684	11.2284	209.621	1.69198	0.0080716										210.548	1.16795	0.00554721
11.184	229.095	20.3895	11.2356	209.468	1.71034	0.00816515										210.443	1.17322	0.00557501
11.208	226.495	20.1789	11.2428	209.316	1.73036	0.00826672										210.339	1.17945	0.00560738
11.232	224.768	19.9474	11.2516	209.125	1.75425	0.0083885										210.21	1.18618	0.00564283
11.256	222.274	19.7789	11.2485	209.192	1.75688	0.00839838										210.255	1.19132	0.00566606
11.28	220.165	19.6701	11.2473	209.218	1.74184	0.00832549										210.272	1.18241	0.00562323
11.304	217.979	19.3814	11.2444	209.282	1.74968	0.00836042										210.316	1.19092	0.00566253
11.328	215.68	19.0928	11.2371	209.436	1.75108	0.00836091										210.421	1.1996	0.00570092
11.352	213.515	18.8969	11.2324	209.537	1.75276	0.00836493										210.49	1.20574	0.00572822
11.376	211.309	18.8557	11.2246	209.702	1.74332	0.00831334										210.604	1.20737	0.00573289
11.4	209.041	18.567	11.2204	209.791	1.75009	0.00834206										210.666	1.21644	0.00577426
11.424	207.072	18.4536	11.2176	209.848	1.7516	0.00834698										210.706	1.22031	0.00579152
11.448	204.608	18.3402	11.2113	209.982	1.74798	0.00832447										210.799	1.22429	0.00580786
11.472	202.371	18.1134	11.2009	210.198	1.74367	0.00829539										210.951	1.23173	0.00583895
11.496	200.474	17.9278	11.1903	210.418	1.73751	0.00825745										211.107	1.23791	0.0058639
11.52	199.071	17.7879	11.1917	210.388	1.72855	0.00821599										211.086	1.23013	0.00582762
11.544	197.323	17.6768	11.1873	210.478	1.72811	0.00821042										211.15	1.23406	0.00584449
11.568	195.313	17.4747	11.1845	210.535	1.73411	0.00823667										211.191	1.24107	0.00587655
11.592	193.374	17.2929	11.1936	210.348	1.75593	0.00834776										211.057	1.24768	0.00591155
11.616	191.333	17.1111	11.2046	210.122	1.7811	0.00847651										210.897	1.25443	0.00594805
11.64	189.646	16.899	11.2125	209.957	1.80387	0.00859161										210.782	1.26219	0.00598814
11.664	187.98	16.7677	11.2251	209.691	1.83072	0.00873057										210.597	1.26733	0.0060178
11.688	185.828	16.6061	11.2353	209.475	1.85629	0.00886163										210.448	1.27369	0.00605231
11.712	183.97	16.3434	11.2436	209.297	1.88471	0.00900492										210.326	1.28367	0.00610323
11.736	182.051	16.1212	11.2476	209.213	1.90425	0.00910199										210.269	1.29236	0.00614625
11.76	180.644	16.0297	11.248	209.204	1.89149	0.00904134										210.263	1.28326	0.00610313
11.784	178.822	15.7822	11.2465	209.235	1.90339	0.00909694										210.284	1.29299	0.00614877
11.808	177.05	15.703	11.2478	209.208	1.91074	0.0091332										210.266	1.29652	0.00616609
11.832	175.495	15.5743	11.2597	208.95	1.94009	0.00928495										210.091	1.30202	0.00619742
11.856	173.832	15.4851	11.2653	208.829	1.95623	0.00936759										210.011	1.30602	0.00621885
11.88	172.109	15.3861	11.2625	208.889	1.9577	0.00937196										210.051	1.31038	0.00623841
11.904	170.545	15.2178	11.2618	208.905	1.96694	0.00941547										210.061	1.3175	0.00627197
11.928	168.812	15.0396	11.2549	209.054	1.96572	0.00940295										210.161	1.32512	0.00630527
11.952	167.584	14.802	11.2565	209.021	1.9836	0.00948997										210.139	1.33527	0.0063542
11.976	166.287	14.6931	11.257	209.008	1.99201	0.00953076										210.131	1.34023	0.00637809
12	164.893	14.6408	11.2629	208.88	1.98754	0.00951522										210.045	1.32985	0.00633128
12.024	163.34	14.5049	11.2711	208.702	2.01254	0.00964314										209.926	1.33616	0.00636491
12.048	161.835	14.3786	11.2778	208.554	2.03474	0.0097564										209.828	1.34211	0.00639623
12.072	160.388	14.2039	11.2904	208.274	2.0731	0.00995373										209.644	1.35029	0.00644085
12.096	159.155	14.1165	11.2992	208.078	2.09846	0.0100849										209.518	1.35463	0.00646546
12.12	157.631	13.9612	11.3109	207.813	2.1364	0.0102804										209.347	1.36217	0.00650674
12.144	156.107	13.8447	11.3215	207.569	2.17068	0.0104576										209.193	1.36805	0.00653968
12.168	154.864	13.7282	11.3329	207.305	2.20815	0.0106517										209.028	1.37391	0.00657289
12.192	153.573	13.5146	11.3435	207.058	2.25253	0.0108788										208.875	1.3844	0.00662791
12.216	152.087	13.3204	11.3492	206.922	2.28409	0.0110384										208.792	1.39423	0.00667762
12.24	150.981	13.1905	11.3504	206.895	2.27626	0.011002										208.775	1.38754	0.0066461
12.264	149.562	13.1429	11.3492	206.924	2.27756	0.0110068										208.793	1.39037	0.00665909
12.288	148.133	13.0095	11.3501	206.901	2.29189	0.0110773										208.778	1.39745	0.00669346
12.312	146.638	12.8952	11.35	206.904	2.30174	0.0111247										208.78	1.4037	0.00672334
12.336	145.343	12.8	11.3438	207.051	2.2933	0.0110761										208.87	1.40895	0.00674558
12.36	143.829	12.7429	11.3374	207.201	2.28179	0.0110125										208.963	1.4124	0.00675911
12.384	142.524	12.6381	11.3202	207.599	2.24696	0.0108235										209.212	1.41815	0.00677853
12.408	141.457	12.5333	11.3129	207.768	2.23809	0.0107721										209.319	1.42395	0.00680279
12.432	140.076	12.419	11.3049	207.948	2.22931	0.0107205										209.434	1.43045	0.00683008
12.456	138.771	12.2857	11.2908	208.266	2.20847	0.0106041										209.639	1.43797	0.00685924
12.48	137.972	12.1589	11.2794	208.518	2.17371	0.0104245										209.805	1.43149	0.00682296
12.504	136.243	12.1028	11.2709	208.705	2.16138	0.0103562										209.928	1.43517	0.00683651
12.528	135.056	11.9533	11.2585	208.976	2.14887	0.0102828										210.109	1.44376	0.0068715
12.552	133.794	11.8411	11.2431	209.309	2.12844	0.0101689										210.334	1.45039	0.00689565
12.576	132.495	11.8131	11.229	209.609	2.10505	0.0100428										210.54	1.45237	0.00689831
12.6	131.402	11.7009	11.2121	209.965	2.08443	0.00992751										210.788	1.459	0.00692168
12.624	130.14	11.6262	11.1852	210.522	2.04588	0.0097181										211.182	1.46348	0.00692995
12.648	128.794	11.5607	11.1618	210.998	2.01523	0.00955095										211.525	1.46752	0.00693782
12.672	127.477	11.4673	11.1324	211.585	1.98041	0.00935986										211.957	1.4731	0.00694999
12.696	126.215	11.3458	11.0992	212.236	1.94582	0.00916816										212.447	1.48028	0.00696776
12.72	125.358	11.2844	11.0762	212.678	1.90447	0.0089547										212.786	1.47023	0.00690945
12.744	124.101	11.2294	11.0456	213.261	1.87336	0.00878437										213.24	1.47347	0.0069099
12.768	123.018	11.1835	11.0286	213.58	1.85858	0.00870204										213.492	1.47637	0.00691535
12.792	121.835	11.1009	11.0149	213.834	1.85087	0.00865564										213.695	1.48166	0.00693352
12.816	121.073	11.0734	10.9975	214.157	1.83516	0.00856926										213.954	1.48329	0.00693273
12.84	120.202	10.9633	10.9729	214.605	1.81948	0.00847828										214.319	1.48989	0.00695173
12.864	119.119	10.9358	10.9498	215.025	1.80009	0.00837155										214.665	1.49152	0.00694814
12.888	118.046	10.7248	10.93	215.379	1.79865	0.00835109										214.96	1.50488	0.00700074
12.912	116.862	10.633	10.9194	215.569	1.79691	0.00833568										215.119	1.51112	0.00702459
12.936	115.358	10.5596	10.9161	215.627	1.8007	0.008351										215.168	1.51665	0.00704867
12.96	114.414	10.5405	10.919	215.576	1.789	0.0082987										215.125	1.50477	0.00699488
12.984	113.333	10.4414	10.9246	215.476	1.80249	0.00836515										215.041	1.51207	0.00703155
13.008	112.441	10.3784	10.933	215.326	1.81578	0.00843272										214.915	1.51704	0.00705876
13.032	111.378	10.2342	10.9299	215.382	1.82528	0.0084746										214.962	1.5273	0.00710495
13.056	110.577	10.1081	10.917	215.611	1.8245	0.00846197										215.155	1.53606	0.00713933
13.08	109.649	10	10.913	215.683	1.83049	0.00848694										215.215	1.54406	0.0071745
13.104	108.568	9.84685	10.9119	215.701	1.84332	0.00854571										215.231	1.55563	0.00722774
13.128	107.676	9.8018	10.9148	215.65	1.85048	0.00858096										215.187	1.55953	0.00724734
13.152	106.856	9.73874	10.9218	215.526	1.86293	0.00864364										215.083	1.56488	0.00727567
13.176	105.658	9.73874	10.9241	215.485	1.86598	0.00865943										215.049	1.56569	0.00728063
13.2	104.947	9.64602	10.9171	215.609	1.85164	0.00858795										215.152	1.55881	0.00724513
13.224	104.212	9.61062	10.9081	215.769	1.84711	0.00856059										215.287	1.5616	0.00725357
13.248	103.274	9.48673	10.8957	215.988	1.84767	0.00855449										215.474	1.57109	0.00729134
13.272	102.345	9.38053	10.8847	216.182	1.84822	0.00854938										215.639	1.57944	0.00732445
13.296	101.265	9.28319	10.8705	216.431	1.8456	0.00852745										215.852	1.58721	0.0073532
13.32	100.363	9.23894	10.8677	216.479	1.84797	0.00853647										215.894	1.59118	0.0073702
13.344	99.5221	9.15929	10.861	216.596	1.85028	0.00854252										215.994	1.59782	0.00739752
13.368	98.7699	9.0708	10.8553	216.695	1.85429	0.00855715										216.08	1.60525	0.00742893
13.392	97.6814	8.99115	10.847	216.839	1.85573	0.00855808										216.205	1.61218	0.00745673
13.416	96.6726	8.93805	10.8363	217.023	1.8528	0.00853733										216.365	1.61686	0.00747284
13.44	95.9565	8.86957	10.82	217.304	1.83056	0.00842398										216.611	1.60826	0.00742464
13.464	95	8.7913	10.8099	217.477	1.83081	0.0084184										216.764	1.61508	0.00745085
13.488	94.0261	8.72174	10.8054	217.554	1.8348	0.00843378										216.831	1.62148	0.0074781
13.512	93.4	8.65217	10.7907	217.803	1.83077	0.00840565										217.052	1.62729	0.00749723
13.536	92.6348	8.58261	10.7845	217.909	1.83343	0.0084137										217.147	1.63362	0.00752309
13.56	91.8	8.55652	10.7832	217.931	1.83573	0.00842344										217.166	1.63647	0.00753556
13.584	91.4348	8.50435	10.7849	217.903	1.84245	0.0084554										217.141	1.6414	0.00755916
13.608	90.7652	8.3913	10.7908	217.802	1.8589	0.00853484										217.051	1.65225	0.00761227
13.632	89.7391	8.36522	10.797	217.696	1.8673	0.00857754										216.957	1.65567	0.00763133
13.656	88.8957	8.23478	10.7972	217.694	1.88164	0.00864351										216.955	1.6683	0.00768959
13.68	88.0769	8.15385	10.7932	217.762	1.87153	0.0085944										217.016	1.66195	0.0076582
13.704	87.5299	8.07692	10.801	217.628	1.88637	0.00866786										216.897	1.66995	0.00769928
13.728	86.6923	7.97436	10.8068	217.53	1.90285	0.00874753										216.81	1.68068	0.00775184
13.752	86.0513	7.93162	10.807	217.525	1.90832	0.00877287										216.806	1.68535	0.00777354
13.776	85.265	7.89744	10.8166	217.363	1.92064	0.00883609										216.663	1.68975	0.00779896
13.8	84.6154	7.87179	10.8291	217.148	1.93457	0.00890899										216.475	1.69333	0.0078223
13.824	84.0256	7.76923	10.8367	217.016	1.95334	0.00900089										216.359	1.70434	0.00787736
13.848	83.4701	7.71795	10.8459	216.857	1.96786	0.00907443										216.221	1.71037	0.00791028
13.872	82.8547	7.65812	10.8523	216.747	1.98114	0.00914034										216.125	1.71726	0.00794568
13.896	82.3077	7.59829	10.8758	216.337	2.01041	0.00929297										215.772	1.72485	0.00799385
13.92	81.8571	7.48739	10.9166	215.619	2.04702	0.00949372										215.161	1.72375	0.00801143
13.944	81.0504	7.44538	10.9618	214.808	2.10112	0.00978139										214.486	1.73046	0.00806792
13.968	80.521	7.36134	11.0065	213.99	2.16514	0.010118										213.82	1.74135	0.00814404
13.992	79.8992	7.30252	11.0569	213.046	2.23978	0.0105131										213.072	1.74976	0.00821207
14.016	79.3445	7.14286	11.1009	212.202	2.32833	0.0109722										212.421	1.76922	0.00832882
14.04	78.7143	7	11.1465	211.305	2.42702	0.0114859										211.75	1.78732	0.00844073
14.064	77.9664	6.93277	11.1843	210.539	2.51015	0.0119225										211.194	1.79673	0.00850751
14.088	77.2521	6.83193	11.2175	209.851	2.59797	0.01238										210.708	1.81015	0.0085908
14.112	76.5294	6.73109	11.2397	209.381	2.66816	0.0127431										210.383	1.82363	0.00866811
14.136	75.7983	6.70588	11.2652	208.831	2.73774	0.0131099										210.012	1.82787	0.00870368
14.16	75.3058	6.64463	11.2822	208.457	2.77285	0.0133018										209.764	1.82108	0.00868156
14.184	74.6612	6.57851	11.2903	208.277	2.80954	0.0134895										209.646	1.83021	0.00873001
14.208	74.1074	6.58678	11.3008	208.042	2.83936	0.013648										209.494	1.82985	0.00873459
14.232	73.3802	6.56198	11.3042	207.965	2.85577	0.013732										209.444	1.8338	0.00875554
14.256	72.8017	6.4876	11.2983	208.098	2.85383	0.0137138										209.53	1.84394	0.00880036
14.28	72.157	6.38843	11.3	208.06	2.8802	0.0138431										209.506	1.85773	0.00886719
14.304	71.4711	6.30579	11.2993	208.076	2.89651	0.0139205										209.516	1.86959	0.00892338
14.328	70.9835	6.24793	11.2924	208.231	2.88885	0.0138733										209.616	1.87796	0.00895901
14.352	70.3223	6.19835	11.2913	208.254	2.89754	0.0139135										209.631	1.88555	0.00899459
14.376	69.6942	6.16529	11.3012	208.032	2.93564	0.0141115										209.488	1.891	0.00902679
14.4	69.2195	6.11382	11.3088	207.86	2.9474	0.0141797										209.377	1.88342	0.00899533
14.424	68.6911	6.06504	11.312	207.788	2.96925	0.0142898										209.332	1.89099	0.00903346
14.448	68.0976	6.04065	11.3152	207.715	2.98627	0.0143768										209.285	1.8952	0.0090556
14.472	67.439	6	11.3253	207.483	3.0304	0.0146055										209.139	1.90196	0.00909424
14.496	66.8293	5.9187	11.3406	207.125	3.10506	0.0149912										208.916	1.91479	0.00916537
14.52	66.2683	5.86179	11.3583	206.706	3.18732	0.0154196										208.66	1.92415	0.00922143
14.544	65.6748	5.79675	11.3727	206.359	3.26395	0.0158168										208.453	1.93487	0.00928206
14.568	65.2602	5.73984	11.3843	206.073	3.3308	0.0161632										208.284	1.94426	0.00933464
14.592	64.8211	5.65041	11.408	205.478	3.47006	0.0168877										207.943	1.95906	0.00942113
14.616	64.4065	5.5935	11.4311	204.879	3.61333	0.0176365										207.61	1.96884	0.00948337
14.64	64.024	5.568	11.4379	204.7	3.63248	0.0177454										207.513	1.95764	0.00943381
14.664	63.368	5.52	11.4399	204.646	3.66073	0.0178881										207.484	1.96627	0.00947674
14.688	62.768	5.48	11.4405	204.63	3.67788	0.0179733										207.476	1.97362	0.0095125
14.712	62.376	5.408	11.4324	204.846	3.65218	0.0178289										207.593	1.98612	0.00956736
14.736	61.792	5.376	11.4137	205.332	3.55879	0.0173319										207.86	1.99218	0.00958424
14.76	61.192	5.384	11.3953	205.799	3.46382	0.0168311										208.126	1.99147	0.00956862
14.784	60.624	5.352	11.3873	206	3.43599	0.0166795										208.242	1.99763	0.00959283
14.808	60.216	5.312	11.3787	206.212	3.40904	0.0165317										208.366	2.005	0.0096225
14.832	59.56	5.28	11.3623	206.611	3.3483	0.0162059										208.603	2.01132	0.00964186
14.856	59.04	5.24	11.3404	207.131	3.27281	0.0158007										208.92	2.01885	0.00966327
14.88	58.7874	5.19685	11.3231	207.533	3.19584	0.0153992										209.17	2.01066	0.00961254
14.904	58.3071	5.11024	11.3118	207.792	3.18189	0.0153129										209.334	2.02678	0.00968202
14.928	57.7323	5.07087	11.3143	207.735	3.20319	0.0154196										209.298	2.03484	0.00972222
14.952	57.0787	5.06299	11.321	207.582	3.23067	0.0155634										209.201	2.03732	0.00973858
14.976	56.7323	5.02362	11.3296	207.382	3.27479	0.0157911										209.075	2.04525	0.00978236
15	56.252	4.97638	11.3377	207.194	3.32094	0.0160282										208.958	2.05495	0.00983426
15.024	55.7638	4.96063	11.3438	207.051	3.3509	0.016184										208.87	2.05875	0.00985658
15.048	55.4331	4.88189	11.3365	207.222	3.34757	0.0161545										208.976	2.07435	0.00992626
15.072	55.0709	4.82677	11.3306	207.36	3.34314	0.0161224										209.062	2.08569	0.00997641
15.096	54.6378	4.80315	11.3395	207.151	3.38671	0.016349										208.932	2.09117	0.0100088
	54.4031	4.7907	11.3429
	53.9845	4.74419	11.3437
	53.5736	4.72868	11.3407
	53.1783	4.69767	11.3263
	52.8062	4.64341	11.3081
	52.4341	4.62791	11.2935
	51.9147	4.58915	11.2818
	51.3488	4.5814	11.2679
	50.7752	4.53488	11.257
	50.5736	4.51163	11.2531
	50.1679	4.47328	11.2438
	49.7939	4.43511	11.2391
	49.3588	4.39695	11.2325
	48.8626	4.35878	11.2402
	48.5496	4.30534	11.2561
	48.0916	4.26718	11.2756
	47.8702	4.24427	11.2978
	47.5344	4.22901	11.3177
	47.1527	4.17557	11.3435
	46.7863	4.1145	11.3713
	46.5564	4.07519	11.3905
	46.1805	4.03008	11.411
	45.8722	4.00752	11.4396
	45.5188	3.95489	11.47
	45.1955	3.92481	11.4965
	44.7444	3.89474	11.5127
	44.3383	3.85714	11.5275
	44.0226	3.79699	11.5557
	43.6842	3.77444	11.5878
	43.3759	3.74436	11.6048
	43.1185	3.73333	11.6201
	43	3.71111	11.6404
	42.7185	3.62963	11.6507
	42.3926	3.59259	11.6532
	42.1037	3.6	11.6572
	41.7185	3.57037	11.6673
	41.4667	3.54074	11.6747
	41.0148	3.53333	11.6883
	40.7185	3.5037	11.696
	40.363	3.47407	11.6842
	40.1241	3.43066	11.6855
	39.7299	3.41606	11.6898
	39.4088	3.35766	11.692
	39.1095	3.29927	11.6994
	38.7591	3.32117	11.706
	38.4599	3.28467	11.7072
	38.1095	3.24818	11.7103
	37.8613	3.22628	11.721
	37.6277	3.21898	11.7205
	37.3869	3.19708	11.7136
	37.2374	3.20144	11.7272
	36.964	3.15108	11.7476
	36.7626	3.1295	11.7523
	36.4604	3.10791	11.7529
	36.2662	3.07914	11.7586
	35.9712	3.04317	11.7594
	35.7986	3	11.7716
	35.5252	3.01439	11.7862
	35.3094	3.00719	11.8081
	35.0863	2.98561	11.8336
	34.8582	2.97872	11.8406
	34.5461	2.93617	11.8399
	34.2411	2.87943	11.8231
	34.1773	2.85106	11.8174
	33.9078	2.8227	11.8166
	33.6312	2.83688	11.8192
	33.4255	2.82979	11.8211
	33.1631	2.8227	11.8095
	32.922	2.80851	11.7909
	32.7872	2.79433	11.7707
	32.6224	2.76923	11.7588
	32.3007	2.75524	11.7678
	32.0629	2.75524	11.7778
	31.8741	2.72727	11.7903
	31.6783	2.69231	11.8022
	31.4056	2.64336	11.8091
	31.1818	2.60839	11.8123
	31.014	2.6014	11.8234
	30.6713	2.58042	11.85
	30.4196	2.56643	11.8771
