# Supplementary material for: Tropospheric temperature measurements with the pure rotational Raman lidar technique using nonlinear calibration functions
Source: Copernicus journal article supplement (doi:10.5194/amt-10-315-2017), 2017-01-27
Supplement: Supplementary file 49 [file 02.10.2014. Temperature profile retrieved using Eqs. (15) and (20).xlsx]

## Sheet: Лист1
z, km
Altitude	Smoothed signals	Smoothed signals	Smoothed ratio
0.048	573	65.5	8.59143	250.575	3.43311	0.0137009	A2	0.075	282.75	0.143	286.15	0.83	277.15			251.586	3.67431	0.0146046
0.072	743	82	8.45197	252.58	2.46271	0.00975022	8.15441	0.182	283.75	0.188	285.55	1.51	274.35			253.708	2.57615	0.010154
0.096	995.333	113	8.38058	253.607	2.08488	0.00822089		0.199	283.55	0.484	282.75	3.05	266.15	3.048	0.645479	254.775	2.15005	0.008439	0.222412
0.12	1177.67	135	8.307	254.667	1.8937	0.00743599	B2	0.24	283.25	0.737	280.25	5.61	250.65	5.616	1.19514	255.859	1.92059	0.00750643	0.269823
0.144	1215.67	150.333	8.2572	255.385	1.79253	0.00701894	-497.892	0.647	280.35	0.835	279.35	7.21	238.15	7.2	0.874709	256.583	1.79536	0.0069972	1.2255
0.168	1204.67	148.333	8.21704	255.965	1.79676	0.00701957		0.821	277.75	1.517	273.55	9.14	224.15	9.144	2.80314	257.16	1.78015	0.00692234	1.79634
0.192	1167.67	153.333	8.11769	257.401	1.75604	0.00682222	C2	1.186	273.95	1.555	273.25	12	210.65	12	1.5583	258.562	1.68827	0.00652946	0.557064
0.216	1124.33	142.667	8.00646	259.012	1.79727	0.00693893	-0.0160297	1.341	274.55	2.11	268.65					260.082	1.66074	0.00638544
0.24	1085.2	140.6	7.94315	259.932	1.39552	0.00536878		1.5	275.35	2.702	268.65					260.921	1.25672	0.00481648
0.264	1046.4	134	7.84723	261.328	1.41568	0.00541725		1.548	275.15	3.053	266.65					262.152	1.21995	0.00465359
0.288	1008.2	129	7.81317	261.825	1.43823	0.00549312		1.605	274.75	3.943	262.05					262.577	1.2182	0.00463939
0.312	976.8	127.6	7.78997	262.164	1.44473	0.00551079		2.242	269.65	4.143	262.05					262.862	1.20878	0.00459852
0.336	954.6	121.8	7.79515	262.088	1.47744	0.00563719		2.449	270.05	4.257	262.05					262.798	1.23958	0.00471685
0.36	928	114.4	7.78307	262.265	1.51987	0.00579517		2.661	268.55	5.195	255.85					262.946	1.2669	0.00481811
0.384	901.8	117.6	7.76429	262.539	1.50121	0.00571806		2.879	267.05	5.59	253.25					263.174	1.23845	0.00470583
0.408	888.4	115.2	7.73749	262.931	1.51258	0.00575275		3.046	265.85	5.62	252.65					263.495	1.22885	0.00466366
0.432	870	110.6	7.70801	263.363	1.53786	0.00583932		3.192	264.45	6.572	244.15					263.843	1.2276	0.00465276
0.456	842.4	109.8	7.69118	263.61	1.54331	0.00585453		3.397	264.45	7.03	240.05					264.039	1.21919	0.00461746
0.48	834.571	107.714	7.66519	263.991	1.3131	0.00497402		3.502	263.55	7.22	239.65					264.337	1.02021	0.00385951
0.504	819.857	109.143	7.60088	264.937	1.29937	0.00490446		3.763	261.45	8.3	232.65					265.056	0.965866	0.003644
0.528	801.857	106.714	7.59068	265.087	1.31287	0.00495261		3.983	262.45	8.402	232.05					265.167	0.968663	0.00365302
0.552	793	105.857	7.59838	264.974	1.31931	0.00497901		4.168	261.15	9.18	225.45					265.084	0.978909	0.00369283
0.576	785.429	105.143	7.5932	265.05	1.3234	0.00499301		5.002	255.25	10.36	215.85					265.14	0.978237	0.00368951
0.6	784.286	103.857	7.61335	264.753	1.33308	0.00503519		5.497	251.45	10.827	211.45					264.919	0.999823	0.00377407
0.624	774.286	104.571	7.61857	264.677	1.33068	0.00502758		5.6	250.65	11.324	210.05					264.861	1.00171	0.003782
0.648	768.571	101.714	7.63633	264.415	1.34975	0.00510467		5.718	249.65	11.382	209.85					264.664	1.02866	0.00388666
0.672	771.857	99	7.64876	264.233	1.36717	0.00517413		5.763	249.25	11.74	210.45					264.524	1.05073	0.00397217
0.696	777.571	99.5714	7.66158	264.044	1.36468	0.00516838		5.99	248.05	12.161	211.55					264.378	1.05778	0.00400102
0.72	768.333	97.3333	7.6564	264.12	1.21599	0.00460392		6.036	247.65	13.54	215.25					264.437	0.939312	0.00355211
0.744	771	98.7778	7.63705	264.405	1.20576	0.00456026		6.903	240.35	13.753	216.05					264.656	0.919364	0.00347381
0.768	775	100.556	7.63752	264.398	1.19596	0.00452335		7.2	237.85	15.715	214.55					264.65	0.912194	0.00344679
0.792	781.222	102.111	7.62574	264.571	1.18608	0.00448303		8.398	227.85	16.08	214.25					264.782	0.897344	0.003389
0.816	798	104.556	7.60098	264.935	1.16973	0.00441516		9.12	222.85							265.055	0.869563	0.00328069
0.84	819.556	110.556	7.59542	265.017	1.13894	0.0042976		10.149	215.05							265.116	0.843258	0.00318071
0.864	852.111	116.111	7.58929	265.107	1.11142	0.00419236		10.3	214.45							265.182	0.819196	0.00308918
0.888	892.444	120.444	7.60136	264.93	1.09178	0.00412103		11.123	209.25							265.051	0.811843	0.00306297
0.912	955.556	128.667	7.6145	264.736	1.05741	0.00399418		11.179	209.05							264.906	0.793708	0.00299618
0.936	1040	138.222	7.64123	264.343	1.02184	0.00386557		11.589	209.35							264.609	0.781352	0.00295286
0.96	1185.45	153	7.67286	263.879	0.879505	0.00333299		11.68	209.45							264.25	0.686742	0.00259884
0.984	1307.73	167.091	7.72722	263.082	0.845252	0.00321289		11.899	209.05							263.617	0.682567	0.00258924
1.008	1458.45	183.727	7.80198	261.988	0.810956	0.00309539		12.061	210.15							262.714	0.682871	0.00259929
1.032	1631.73	207.818	7.87218	260.964	0.767965	0.00294279		12.469	212.75							261.837	0.669827	0.00255819
1.056	1817.18	228.727	7.94085	259.965	0.736294	0.00283228		12.576	213.45							260.951	0.662412	0.00253845
1.08	2019.73	253.091	7.99554	259.171	0.703457	0.00271426		13.47	214.25							260.228	0.647253	0.00248725
1.104	2254	281.364	8.02276	258.776	0.668793	0.00258445		14.322	217.05							259.863	0.621859	0.00239303
1.128	2522.55	309.091	8.04175	258.5	0.638616	0.00247047		15.201	216.75							259.606	0.598017	0.00230356
1.152	2812.27	343.727	8.04945	258.389	0.605959	0.00234514		16.03	216.45							259.501	0.569034	0.0021928
1.176	3118.09	381.091	8.06217	258.204	0.576201	0.00223157										259.328	0.543569	0.00209607
1.2	3465.31	426.462	8.06852	258.112	0.501542	0.00194311										259.241	0.474203	0.0018292
1.224	3794.08	471.462	8.06644	258.143	0.477163	0.00184845										259.269	0.450822	0.00173882
1.248	4127.69	513.692	8.06082	258.224	0.456915	0.00176945										259.346	0.430831	0.00166122
1.272	4477.38	558.077	8.03633	258.579	0.437361	0.0016914										259.679	0.408739	0.00157401
1.296	4813.38	602.308	8.00463	259.039	0.419796	0.00162059										260.107	0.387632	0.00149028
1.32	5162.62	644.154	7.97032	259.537	0.404529	0.00155866										260.563	0.368456	0.00141408
1.344	5532.23	695.231	7.93733	260.016	0.388317	0.00149343										260.997	0.348824	0.0013365
1.368	5917.23	744.385	7.90261	260.521	0.374068	0.00143584										261.447	0.330909	0.00126568
1.392	6292.23	797.308	7.8627	261.102	0.360234	0.00137967										261.957	0.312779	0.00119401
1.416	6655.62	849.692	7.81939	261.734	0.347698	0.00132844										262.5	0.295451	0.00112553
1.44	6988.73	895.467	7.77674	262.357	0.314136	0.00119736										263.023	0.260946	0.000992104
1.464	7337.4	945.2	7.72794	263.071	0.304496	0.00115747										263.608	0.245995	0.000933183
1.488	7669.73	1000.53	7.67931	263.784	0.294874	0.00111786										264.176	0.231201	0.000875178
1.512	8015.13	1055.13	7.62836	264.532	0.285992	0.00108112										264.753	0.216764	0.000818743
1.536	8346.33	1106	7.57969	265.249	0.278247	0.001049										265.286	0.203629	0.000767583
1.56	8686.87	1154.8	7.5365	265.886	0.271329	0.00102047										265.745	0.192018	0.000722566
1.584	9007.73	1204.6	7.49374	266.518	0.264771	0.000993446										266.184	0.180812	0.000679274
1.608	9319.67	1255.6	7.45458	267.098	0.258581	0.000968112										266.574	0.170506	0.00063962
1.632	9642.33	1305	7.42306	267.565	0.253027	0.000945663										266.877	0.161914	0.000606699
1.656	9957.27	1353.53	7.39608	267.966	0.247946	0.000925288										267.13	0.154428	0.000578099
1.68	10249.9	1393.06	7.3723	268.32	0.229114	0.000853884										267.348	0.139178	0.000520588
1.704	10534.1	1436.29	7.34898	268.667	0.225241	0.000838366										267.556	0.133368	0.000498468
1.728	10808.7	1474.18	7.32743	268.988	0.221932	0.000825062										267.744	0.128205	0.000478832
1.752	11076.6	1513.41	7.31191	269.22	0.218777	0.000812633										267.877	0.124074	0.000463175
1.776	11340.5	1553.59	7.29939	269.407	0.215739	0.000800794										267.982	0.120494	0.000449636
1.8	11591.8	1591.24	7.28651	269.6	0.212971	0.000789952										268.089	0.117044	0.000436588
1.824	11843.9	1630.06	7.27253	269.809	0.210209	0.000779104										268.203	0.113467	0.000423063
1.848	12066.1	1666.41	7.26044	269.989	0.20774	0.000769438										268.299	0.110357	0.000411321
1.872	12279.4	1693.29	7.24654	270.198	0.20583	0.000761776										268.409	0.107297	0.00039975
1.896	12463.6	1718.88	7.23295	270.401	0.204066	0.000754678										268.514	0.104374	0.00038871
1.92	12597.4	1746.05	7.22249	270.558	0.191414	0.000707477										268.594	0.0964443	0.000359071
1.944	12763.7	1771.74	7.21348	270.694	0.189899	0.000701526										268.662	0.0944241	0.000351461
1.968	12898.6	1791.16	7.20491	270.822	0.188739	0.000696911										268.725	0.0926539	0.00034479
1.992	13030.4	1815.05	7.19718	270.938	0.18741	0.000691707										268.782	0.0909249	0.000338285
2.016	13146.2	1833.63	7.18733	271.086	0.186324	0.000687323										268.853	0.0890246	0.000331127
2.04	13264.1	1846.21	7.17884	271.214	0.185537	0.000684096										268.914	0.0874628	0.000325245
2.064	13352.4	1858.21	7.17255	271.309	0.184841	0.000681293										268.958	0.0862554	0.000320702
2.088	13425.9	1872.05	7.16648	271.4	0.184087	0.000678287										269.001	0.0850533	0.000316183
2.112	13469.7	1882.37	7.15994	271.499	0.18351	0.000675916										269.046	0.0838703	0.000311733
2.136	13524.2	1893.26	7.15648	271.551	0.18295	0.000673722										269.07	0.0831289	0.00030895
2.16	13515.3	1888.24	7.1538	271.591	0.174192	0.000641377										269.088	0.0787915	0.00029281
2.184	13544.4	1895.48	7.15064	271.639	0.173833	0.000639942										269.109	0.0782063	0.000290612
2.208	13546.8	1898.05	7.14904	271.663	0.173705	0.000639415										269.12	0.0779339	0.000289588
2.232	13537.6	1898.86	7.14829	271.674	0.17367	0.000639257										269.125	0.0778177	0.000289151
2.256	13535	1895.38	7.15136	271.628	0.173854	0.000640046										269.104	0.0783125	0.000291011
2.28	13516.4	1893.05	7.15745	271.536	0.174048	0.000640978										269.063	0.0792145	0.000294409
2.304	13486.1	1886.24	7.16354	271.444	0.174434	0.000642613										269.021	0.0802022	0.000298126
2.328	13454.2	1877	7.17178	271.32	0.174952	0.000644816										268.963	0.0815383	0.000303158
2.352	13417	1872.95	7.1809	271.183	0.175277	0.000646341										268.899	0.0828986	0.000308289
2.376	13357.1	1857.86	7.19185	271.019	0.176105	0.000649789										268.821	0.0847381	0.000315222
2.4	13271.4	1840.61	7.20453	270.828	0.169205	0.00062477										268.728	0.0830158	0.000308921
2.424	13195.2	1826.43	7.21535	270.665	0.16999	0.000628045										268.648	0.0847592	0.000315503
2.448	13115.4	1812.43	7.22483	270.523	0.170761	0.000631224										268.576	0.08633	0.000321436
2.472	13040.4	1801.78	7.2336	270.392	0.171386	0.000633844										268.509	0.0877407	0.00032677
2.496	12946.2	1785.74	7.24314	270.249	0.172271	0.000637455										268.436	0.0893816	0.000332972
2.52	12865	1767.04	7.25056	270.138	0.173241	0.000641308										268.378	0.0908082	0.00033836
2.544	12755.1	1757.13	7.25733	270.036	0.173857	0.000643829										268.324	0.0919723	0.000342766
2.568	12648.6	1743.65	7.26287	269.953	0.174615	0.000646833										268.28	0.0930606	0.000346879
2.592	12533.1	1725.26	7.26809	269.875	0.175603	0.000650684										268.238	0.0942373	0.000351319
2.616	12423.7	1709.26	7.27497	269.772	0.176518	0.000654321										268.183	0.0955838	0.000356413
2.64	12276	1688.32	7.2824	269.661	0.170457	0.000632117										268.122	0.0931907	0.000347568
2.664	12140.9	1666.6	7.28902	269.562	0.171639	0.000636733										268.068	0.0946296	0.000353006
2.688	12015.2	1649.2	7.29726	269.439	0.172659	0.00064081										268	0.0961795	0.000358879
2.712	11874.9	1628.08	7.3064	269.302	0.173895	0.000645725										267.923	0.0979635	0.00036564
2.736	11733.8	1604.48	7.31615	269.157	0.175284	0.000651232										267.841	0.0999143	0.000373036
2.76	11600.5	1582.28	7.32757	268.986	0.17665	0.000656726										267.743	0.102062	0.000381195
2.784	11458	1558.2	7.33837	268.825	0.178139	0.000662657										267.649	0.104217	0.000389378
2.808	11312.2	1539.12	7.3513	268.633	0.179439	0.000667972										267.536	0.106524	0.000398168
2.832	11159	1517.28	7.36373	268.447	0.180907	0.000673903										267.425	0.10888	0.00040714
2.856	11014.4	1494.16	7.37587	268.267	0.182463	0.000680154										267.316	0.111264	0.000416227
2.88	10872.8	1470.48	7.3875	268.094	0.177124	0.000660681										267.21	0.109343	0.000409202
2.904	10724.4	1451.22	7.39907	267.922	0.178476	0.00066615										267.103	0.111501	0.000417444
2.928	10578.1	1424.26	7.40919	267.771	0.180258	0.000673181										267.008	0.113775	0.000426109
2.952	10440.3	1406.63	7.42082	267.599	0.181571	0.00067852										266.899	0.115934	0.000434375
2.976	10296.6	1386.3	7.43357	267.409	0.183089	0.000684675										266.777	0.118359	0.000443664
3	10153	1364.44	7.44676	267.214	0.184736	0.000691343										266.65	0.120929	0.000453514
3.024	10016.4	1342.93	7.45958	267.024	0.186389	0.000698023										266.525	0.12347	0.000463259
3.048	9875.26	1322.93	7.47499	266.795	0.188032	0.00070478										266.372	0.126308	0.000474179
3.072	9736.26	1302.04	7.48991	266.575	0.189758	0.00071184										266.223	0.129156	0.000485142
3.096	9599.19	1280.78	7.50701	266.322	0.191584	0.000719369										266.05	0.132325	0.000497368
3.12	9481.24	1261.34	7.52657	266.033	0.186562	0.000701275										265.848	0.13097	0.000492648
3.144	9340.55	1239.62	7.54798	265.717	0.188514	0.000709454										265.625	0.134636	0.000506865
3.168	9204.55	1217.62	7.56911	265.405	0.190525	0.000717865										265.4	0.138321	0.000521179
3.192	9076.72	1195.69	7.59172	265.072	0.192599	0.000726594										265.156	0.142213	0.000536337
3.216	8948.07	1175.79	7.61521	264.726	0.194597	0.000735088										264.899	0.146141	0.000551686
3.24	8828.24	1155.14	7.63886	264.378	0.196693	0.000743984										264.635	0.15016	0.000567424
3.264	8710.79	1134.72	7.66236	264.033	0.19882	0.000753011										264.37	0.154186	0.000583223
3.288	8587.03	1116.48	7.68479	263.704	0.200819	0.000761531										264.112	0.158005	0.000598249
3.312	8472.28	1098.38	7.70588	263.394	0.202818	0.000770016										263.867	0.161689	0.000612766
3.336	8351.72	1079.59	7.72287	263.145	0.204855	0.000778488										263.668	0.165	0.000625787
3.36	8244.1	1063.06	7.73931	262.905	0.199941	0.000760507										263.473	0.162609	0.000617176
3.384	8131.87	1045.87	7.75387	262.692	0.201815	0.000768258										263.299	0.165514	0.000628617
3.408	8021	1030.74	7.76579	262.517	0.203502	0.000775196										263.156	0.168023	0.000638492
3.432	7913.13	1015.61	7.77521	262.379	0.205175	0.000781977										263.042	0.170291	0.000647394
3.456	7807.42	1003.77	7.78347	262.259	0.206558	0.00078761										262.941	0.172216	0.000654959
3.48	7694.32	987.581	7.79114	262.147	0.208371	0.000794865										262.848	0.174449	0.00066369
3.504	7588.29	972.516	7.79805	262.046	0.210095	0.000801748										262.763	0.176543	0.000671874
3.528	7481.48	958.226	7.80264	261.979	0.211737	0.000808223										262.706	0.178356	0.000678918
3.552	7372.9	945.871	7.80927	261.882	0.213266	0.00081436										262.625	0.180271	0.000686421
3.576	7267.29	931.194	7.81525	261.795	0.215044	0.000821424										262.551	0.182341	0.000694497
3.6	7176.76	917.697	7.82452	261.659	0.210108	0.000802985										262.436	0.179007	0.000682099
3.624	7082.39	904.394	7.83501	261.506	0.211838	0.000810068										262.305	0.181442	0.000691721
3.648	6981.64	892.152	7.84654	261.338	0.213523	0.000817039										262.161	0.183939	0.000701628
3.672	6884.58	876.485	7.85821	261.168	0.215612	0.00082557										262.014	0.186802	0.000712949
3.696	6788.21	863.939	7.87311	260.951	0.217471	0.00083338										261.825	0.189765	0.000724779
3.72	6694.94	849.606	7.88771	260.738	0.219562	0.000842081										261.639	0.192907	0.000737301
3.744	6602.36	835.061	7.9002	260.556	0.221685	0.000850815										261.478	0.195893	0.000749174
3.768	6515.45	821.667	7.91245	260.378	0.223707	0.000859161										261.32	0.198774	0.000760654
3.792	6420.21	809	7.92397	260.21	0.225687	0.000867325										261.171	0.20156	0.000771756
3.816	6333.27	795.758	7.93295	260.08	0.227714	0.000875555										261.054	0.204169	0.000782092
3.84	6251.94	784.943	7.94155	259.955	0.222803	0.000857083										260.942	0.200506	0.000768393
3.864	6160	774.086	7.94764	259.866	0.224501	0.00086391										260.862	0.202559	0.000776497
3.888	6071.34	762.171	7.95139	259.812	0.226317	0.000871082										260.813	0.204522	0.000784169
3.912	5988.37	753.029	7.95346	259.782	0.227753	0.000876711										260.786	0.205999	0.000789915
3.936	5906.91	742.686	7.95487	259.761	0.229363	0.000882976										260.767	0.207577	0.000796024
3.96	5823.94	732.4	7.95549	259.752	0.230984	0.000889248										260.759	0.209099	0.000801885
3.984	5741.86	722.514	7.95536	259.754	0.232564	0.000895324										260.761	0.210518	0.000807321
4.008	5657.2	711.8	7.95689	259.732	0.234341	0.000902241										260.741	0.212261	0.000814071
4.032	5579.34	701.6	7.95617	259.742	0.236014	0.000908648										260.75	0.213713	0.000819609
4.056	5501.97	691.943	7.95628	259.741	0.23766	0.000914988										260.749	0.215213	0.000825366
4.08	5432.78	682.027	7.95673	259.734	0.232808	0.000896333										260.743	0.21086	0.000808689
4.104	5355.3	672.486	7.95664	259.735	0.234455	0.00090267										260.744	0.212343	0.000814374
4.128	5287.14	663	7.95821	259.713	0.236144	0.00090925										260.723	0.214013	0.000820842
4.152	5212.03	654.946	7.96395	259.629	0.237749	0.000915726										260.648	0.215982	0.000828636
4.176	5140.84	646.351	7.97116	259.524	0.239497	0.000922831										260.552	0.218216	0.000837512
4.2	5069.51	637	7.97678	259.443	0.241371	0.000930342										260.478	0.220426	0.000846238
4.224	4998.05	628.622	7.98297	259.353	0.243131	0.000937453										260.396	0.22259	0.000854814
4.248	4924.11	618.27	7.98933	259.261	0.245285	0.000946093										260.311	0.225133	0.00086486
4.272	4858.49	606.486	7.99731	259.145	0.247766	0.000956092										260.205	0.228129	0.00087673
4.296	4796.84	597.243	8.00726	259.001	0.24988	0.000964786										260.071	0.23097	0.000888102
4.32	4737.69	591.231	8.0202	258.813	0.244961	0.000946478										259.897	0.227549	0.000875534
4.344	4678.33	582.333	8.03196	258.642	0.247072	0.000955265										259.739	0.230528	0.000887537
4.368	4616.08	574.615	8.04528	258.449	0.249049	0.000963629										259.558	0.233518	0.000899675
4.392	4556.69	565.179	8.05919	258.247	0.251411	0.000973526										259.369	0.236921	0.000913452
4.416	4498.9	557.667	8.06854	258.112	0.253322	0.000981441										259.241	0.239515	0.000923912
4.44	4439.31	548.333	8.07763	257.98	0.255647	0.000990954										259.116	0.242484	0.000935813
4.464	4380.46	541.615	8.08983	257.804	0.25755	0.000999017										258.948	0.245318	0.000947364
4.488	4318.38	533.308	8.09798	257.686	0.259741	0.00100797										258.836	0.248089	0.000958482
4.512	4264.74	525.385	8.10577	257.573	0.261858	0.00101664										258.728	0.250765	0.000969223
4.536	4205.62	518.333	8.11186	257.485	0.263798	0.00102452										258.643	0.253133	0.000978695
4.56	4154.27	510.878	8.11885	257.384	0.259303	0.00100745										258.546	0.24939	0.000964586
4.584	4099.34	503.146	8.12319	257.321	0.261372	0.00101574										258.486	0.251736	0.000973889
4.608	4040.54	497.39	8.12924	257.233	0.263081	0.00102273										258.401	0.253877	0.00098249
4.632	3983.66	490.659	8.13433	257.16	0.265022	0.00103057										258.33	0.256166	0.000991621
4.656	3929.83	483.415	8.14038	257.072	0.267142	0.00103917										258.246	0.258711	0.0010018
4.68	3880.63	476.488	8.14835	256.957	0.269264	0.0010479										258.134	0.261419	0.00101272
4.704	3832.37	470.585	8.15564	256.852	0.271146	0.00105565										258.031	0.263841	0.00102251
4.728	3781.41	463.732	8.16324	256.742	0.273332	0.00106462										257.924	0.266587	0.00103359
4.752	3734.41	458.024	8.17689	256.545	0.275408	0.00107353										257.732	0.269718	0.00104651
4.776	3686.56	450.463	8.19086	256.343	0.278045	0.00108466										257.534	0.273424	0.0010617
4.8	3644.09	444.326	8.20687	256.112	0.273782	0.001069										257.306	0.270475	0.00105118
4.824	3599.26	438.302	8.22454	255.857	0.276133	0.00107925										257.053	0.27415	0.00106651
4.848	3549.88	431.279	8.24327	255.586	0.27887	0.0010911										256.784	0.278281	0.00108372
4.872	3506.44	423.814	8.2635	255.295	0.281822	0.00110391										256.492	0.28273	0.00110229
4.896	3459.53	418.186	8.2852	254.982	0.284349	0.00111517										256.177	0.286846	0.00111972
4.92	3417.79	411.512	8.30374	254.714	0.287136	0.00112729										255.907	0.290983	0.00113707
4.944	3372.84	404.488	8.32219	254.448	0.290114	0.00114017										255.637	0.295299	0.00115515
4.968	3330.23	398.837	8.34197	254.163	0.292746	0.0011518										255.346	0.299345	0.00117231
4.992	3288.21	392.535	8.35907	253.917	0.295567	0.00116403										255.094	0.303389	0.00118932
5.016	3246.74	386.884	8.3739	253.704	0.298156	0.00117521										254.874	0.307037	0.00120466
5.04	3208.44	382.511	8.38933	253.482	0.293604	0.00115829										254.645	0.303341	0.00119123
5.064	3169.38	377.111	8.40142	253.308	0.296049	0.00116873										254.465	0.306634	0.00120501
5.088	3131.82	371.533	8.41225	253.152	0.298561	0.00117937										254.304	0.309916	0.00121868
5.112	3090	367.022	8.42359	252.989	0.300774	0.00118889										254.134	0.312919	0.00123131
5.136	3050.69	361.6	8.43271	252.857	0.303285	0.00119943										253.997	0.316094	0.00124448
5.16	3014.16	357.022	8.43868	252.771	0.305408	0.00120824										253.908	0.318673	0.00125507
5.184	2979.13	353.044	8.44634	252.661	0.307385	0.00121659										253.793	0.321204	0.00126561
5.208	2941.96	347.844	8.45753	252.5	0.310011	0.00122777										253.624	0.324627	0.00127995
5.232	2908.29	343.178	8.46724	252.361	0.312408	0.00123794										253.478	0.327719	0.00129289
5.256	2871.71	338.756	8.47821	252.203	0.31481	0.00124824										253.312	0.330892	0.00130626
5.28	2838.89	335.66	8.4893	252.043	0.309869	0.00122943										253.145	0.326335	0.00128912
5.304	2803.55	330.915	8.4998	251.892	0.312412	0.00124026										252.986	0.32961	0.00130288
5.328	2770.89	324.936	8.5147	251.678	0.315681	0.0012543										252.759	0.333896	0.00132101
5.352	2736.85	320.617	8.52746	251.495	0.31823	0.00126535										252.565	0.337297	0.00133548
5.376	2700.57	316.234	8.53849	251.336	0.320811	0.00127642										252.397	0.340634	0.0013496
5.4	2667.55	311.681	8.55196	251.143	0.323592	0.00128848										252.191	0.34431	0.00136527
5.424	2634.21	307.809	8.56977	250.887	0.326268	0.00130046										251.918	0.348094	0.00138177
5.448	2602.13	302.489	8.58638	250.648	0.329648	0.00131518										251.663	0.352554	0.0014009
5.472	2567.51	298.617	8.59841	250.475	0.332235	0.00132642										251.478	0.355927	0.00141534
5.496	2536.34	295.064	8.60955	250.315	0.334654	0.00133693										251.307	0.35907	0.00142881
5.52	2509.65	290.959	8.62132	250.146	0.330437	0.00132098										251.125	0.355109	0.00141407
5.544	2480.02	286.592	8.632	249.992	0.333293	0.00133321										250.96	0.358681	0.00142924
5.568	2449.35	283	8.6469	249.778	0.335968	0.00134506										250.729	0.362248	0.00144478
5.592	2418.73	279.306	8.65807	249.618	0.338604	0.00135649										250.556	0.365596	0.00145914
5.616	2390.51	276.082	8.66941	249.455	0.341021	0.00136706										250.38	0.36871	0.0014726
5.64	2363.9	272.673	8.68072	249.292	0.34357	0.00137818										250.204	0.371961	0.00148663
5.664	2336.69	269.327	8.69124	249.141	0.346104	0.00138919										250.041	0.375155	0.00150038
5.688	2312.37	265.122	8.7022	248.984	0.349185	0.00140244										249.87	0.378958	0.00151662
5.712	2287.24	262.143	8.71209	248.842	0.35156	0.00141279										249.716	0.381946	0.00152952
5.736	2260.45	259.143	8.72624	248.638	0.354178	0.00142447										249.495	0.385364	0.00154458
5.76	2236.84	256.51	8.74274	248.401	0.34962	0.00140748										249.236	0.381041	0.00152884
5.784	2211.84	253.039	8.75984	248.156	0.352675	0.00142118										248.968	0.385007	0.00154641
5.808	2185.43	249.078	8.77746	247.902	0.35614	0.00143661										248.692	0.389423	0.00156589
5.832	2158.63	246.314	8.78934	247.732	0.35866	0.00144778										248.505	0.392591	0.00157981
5.856	2132.65	241.922	8.80216	247.547	0.362345	0.00146374										248.303	0.397059	0.00159909
5.88	2109.86	238.667	8.81496	247.364	0.365314	0.00147683										248.102	0.400733	0.0016152
5.904	2085.14	235.412	8.82717	247.188	0.368334	0.0014901										247.909	0.404436	0.00163139
5.928	2059.92	232.235	8.83967	247.008	0.371377	0.0015035										247.712	0.408163	0.00164773
5.952	2034.86	229.863	8.84707	246.902	0.37366	0.00151339										247.595	0.410895	0.00165955
5.976	2012.98	227.039	8.85634	246.769	0.376369	0.00152519										247.448	0.414149	0.00167368
6	1993.13	224.868	8.86	246.716	0.371148	0.00150435										247.39	0.408508	0.00165127
6.024	1968.57	222.321	8.862	246.687	0.373378	0.00151357										247.358	0.41102	0.00166164
6.048	1946.42	219.226	8.86184	246.69	0.375945	0.00152396										247.361	0.413841	0.00167303
6.072	1922.81	217.132	8.86272	246.677	0.377844	0.00153174										247.347	0.415956	0.00168167
6.096	1901.94	214.528	8.86781	246.604	0.380344	0.00154233										247.266	0.418853	0.00169393
6.12	1878.58	212.132	8.87181	246.546	0.382694	0.00155222										247.203	0.421554	0.0017053
6.144	1858.23	209.679	8.8758	246.489	0.385099	0.00156234										247.14	0.424315	0.0017169
6.168	1835.79	207.302	8.88265	246.39	0.38764	0.00157327										247.031	0.427304	0.00172976
6.192	1814.79	204.377	8.89	246.285	0.390701	0.00158638										246.915	0.430878	0.00174505
6.216	1794.98	201.491	8.90511	246.067	0.394156	0.00160182										246.675	0.435086	0.0017638
6.24	1776.55	199.382	8.92274	245.814	0.389808	0.00158579										246.395	0.430715	0.00174807
6.264	1755.58	197.091	8.942	245.537	0.393012	0.00160063										246.088	0.434693	0.00176641
6.288	1735.65	194.364	8.9601	245.276	0.396606	0.00161698										245.8	0.439049	0.0017862
6.312	1716.45	191.582	8.97806	245.017	0.400311	0.00163381										245.514	0.443501	0.00180642
6.336	1699.36	188.364	8.99393	244.789	0.404386	0.00165198										245.261	0.448301	0.00182785
6.36	1679.98	185.436	9.00903	244.572	0.408261	0.00166929										245.02	0.452848	0.00184821
6.384	1660.04	183.073	9.02666	244.318	0.411796	0.00168549										244.738	0.457036	0.00186745
6.408	1641.75	181.182	9.05053	243.974	0.415225	0.00170192										244.356	0.461157	0.00188724
6.432	1623	179.273	9.07385	243.637	0.41871	0.00171858										243.982	0.465286	0.00190705
6.456	1605.55	177.327	9.09642	243.312	0.42224	0.00173539										243.62	0.469408	0.0019268
6.48	1590.75	175.298	9.11539	243.038	0.418153	0.00172053										243.316	0.464993	0.00191107
6.504	1572.63	172.737	9.13114	242.811	0.422051	0.00173819										243.063	0.469409	0.00193122
6.528	1557.3	169.825	9.14817	242.565	0.426467	0.00175816										242.79	0.474382	0.00195388
6.552	1538.98	167.526	9.16801	242.278	0.430484	0.00177682										242.471	0.478888	0.00197503
6.576	1522.33	165.333	9.18689	242.005	0.434382	0.00179493										242.167	0.483226	0.00199542
6.6	1504.23	162.965	9.20633	241.724	0.438627	0.00181458										241.854	0.487914	0.00201739
6.624	1487.14	161.07	9.2271	241.423	0.442445	0.00183265										241.52	0.492083	0.00203744
6.648	1471.21	158.965	9.24594	241.151	0.446466	0.0018514										241.217	0.496449	0.0020581
6.672	1455.91	156.895	9.2575	240.983	0.450061	0.0018676										241.03	0.500364	0.00207593
6.696	1439.67	155.456	9.26697	240.846	0.452776	0.00187994										240.878	0.503305	0.00208946
6.72	1425.54	153.814	9.27475	240.733	0.447873	0.00186046										240.753	0.497785	0.00206762
6.744	1410.75	151.644	9.28109	240.641	0.451381	0.00187574										240.65	0.501622	0.00208444
6.768	1394.36	149.746	9.28985	240.514	0.454769	0.00189082										240.509	0.505296	0.00210094
6.792	1378.19	148.237	9.29854	240.388	0.457668	0.00190387										240.369	0.508418	0.00211516
6.816	1363.37	146.746	9.30417	240.307	0.460367	0.00191575										240.279	0.511348	0.00212815
6.84	1348.78	145.136	9.31432	240.159	0.46357	0.00193026										240.115	0.514775	0.00214387
6.864	1333.69	143.407	9.3255	239.997	0.467077	0.00194618										239.935	0.518512	0.00216105
6.888	1321.44	141.644	9.33483	239.861	0.470525	0.00196165										239.784	0.522199	0.00217778
6.912	1306.22	139.695	9.34359	239.734	0.474334	0.00197858										239.643	0.526286	0.00219612
6.936	1290.69	138.169	9.35567	239.559	0.477792	0.00199447										239.448	0.529914	0.00221306
6.96	1279.44	136.508	9.37148	239.329	0.473742	0.00197946										239.194	0.525131	0.00219542
6.984	1265.48	134.754	9.38603	239.117	0.477774	0.00199808										238.959	0.529308	0.00221506
7.008	1251.41	133.049	9.40294	238.871	0.481971	0.0020177										238.686	0.533591	0.00223553
7.032	1238.28	131.623	9.4169	238.668	0.485559	0.00203446										238.461	0.537238	0.00225294
7.056	1224.98	129.902	9.43057	238.468	0.489691	0.00205349										238.241	0.541471	0.00227279
7.08	1211.31	127.984	9.44745	238.222	0.494491	0.00207575										237.969	0.54633	0.0022958
7.104	1198.41	126.77	9.46206	238.009	0.497959	0.00209219										237.733	0.549749	0.00231246
7.128	1184.82	124.902	9.47603	237.805	0.502635	0.00211364										237.508	0.554494	0.00233463
7.152	1172.15	123.607	9.48756	237.637	0.506143	0.0021299										237.323	0.558004	0.00235125
7.176	1159.43	122.033	9.50029	237.451	0.510329	0.0021492										237.118	0.562202	0.00237098
7.2	1149.29	120.635	9.51228	237.275	0.505916	0.00213219										236.924	0.556938	0.0023507
7.224	1137.81	119.349	9.5213	237.143	0.509315	0.00214771										236.779	0.560366	0.00236662
7.248	1124.14	117.778	9.53366	236.962	0.513642	0.00216761										236.58	0.56468	0.00238684
7.272	1113.17	116.778	9.54504	236.796	0.516768	0.00218234										236.397	0.567691	0.00240143
7.296	1101.63	115.381	9.55994	236.577	0.521042	0.00220242										236.157	0.571805	0.00242129
7.32	1090.52	114.048	9.57536	236.351	0.525297	0.00222253										235.909	0.575845	0.00244096
7.344	1078.13	112.73	9.59012	236.134	0.52957	0.00224266										235.672	0.579902	0.00246063
7.368	1065.79	111.143	9.60866	235.862	0.534826	0.00226754										235.374	0.584831	0.00248469
7.392	1055.1	109.778	9.62369	235.641	0.539363	0.00228892										235.132	0.589092	0.00250537
7.416	1044.3	108.254	9.64195	235.372	0.544631	0.00231392										234.839	0.59396	0.00252922
7.44	1034.6	106.985	9.66068	235.096	0.540917	0.00230083										234.538	0.588973	0.0025112
7.464	1023.34	105.615	9.67984	234.814	0.546051	0.00232546										234.231	0.593561	0.00253409
7.488	1012.25	103.954	9.69923	234.527	0.55201	0.00235371										233.92	0.598978	0.00256062
7.512	1001.62	103.154	9.71638	234.274	0.555781	0.00237236										233.645	0.602097	0.00257698
7.536	991.6	101.877	9.73565	233.988	0.560974	0.00239744										233.336	0.606586	0.00259962
7.56	980.631	100.538	9.75203	233.746	0.566183	0.00242222										233.074	0.611215	0.00262241
7.584	970.662	99.3231	9.76664	233.529	0.570982	0.00244501										232.84	0.615472	0.00264332
7.608	961.462	98.3385	9.78117	233.313	0.57523	0.00246548										232.608	0.619104	0.00266158
7.632	951.631	97.3231	9.79126	233.163	0.57921	0.00248414										232.446	0.622715	0.00267896
7.656	942.723	95.9692	9.80421	232.971	0.584445	0.00250866										232.239	0.627457	0.00270177
7.68	934.582	95.1045	9.81398	232.826	0.579225	0.00248781										232.084	0.62118	0.00267654
7.704	924.582	94.0448	9.82087	232.723	0.583158	0.0025058										231.974	0.624914	0.0026939
7.728	915.97	93	9.83071	232.576	0.587371	0.0025255										231.816	0.628726	0.00271217
7.752	907.09	92.1045	9.84321	232.39	0.591501	0.0025453										231.617	0.632235	0.00272965
7.776	897.448	91.0896	9.85713	232.182	0.596222	0.0025679										231.395	0.636238	0.00274957
7.8	886.985	90.1343	9.86284	232.097	0.600006	0.00258515										231.304	0.63984	0.00276623
7.824	877.478	89.2687	9.86945	231.998	0.603638	0.00260191										231.199	0.643204	0.00278203
7.848	868.94	87.9403	9.87721	231.882	0.608866	0.00262576										231.075	0.648164	0.00280499
7.872	860.194	86.7612	9.88533	231.761	0.613774	0.00264831										230.946	0.652738	0.00282636
7.896	851.119	85.7015	9.89624	231.597	0.618707	0.00267148										230.773	0.657093	0.00284736
7.92	843.609	85.3333	9.9044	231.475	0.612005	0.00264393										230.643	0.649309	0.00281521
7.944	833.71	84.2174	9.91195	231.362	0.61684	0.00266613										230.523	0.653812	0.00283621
7.968	824.957	83.1884	9.9193	231.252	0.621414	0.00268718										230.406	0.658038	0.00285599
7.992	816.246	82.1304	9.92229	231.207	0.625677	0.00270614										230.359	0.662297	0.00287507
8.016	807.594	81.0145	9.92243	231.205	0.629901	0.00272443										230.356	0.666756	0.00289446
8.04	798.681	80.3333	9.92094	231.227	0.632473	0.00273529										230.38	0.669607	0.00290653
8.064	790.594	79.6667	9.92015	231.239	0.635077	0.00274641										230.393	0.672433	0.00291864
8.088	781.638	78.8696	9.91778	231.274	0.638045	0.00275882										230.43	0.675782	0.0029327
8.112	774.435	78.1159	9.91686	231.288	0.640999	0.00277143										230.445	0.678991	0.00294644
8.136	767.13	77.3623	9.91438	231.326	0.64382	0.00278318										230.484	0.682197	0.00295984
8.16	760.225	76.6761	9.91279	231.349	0.637344	0.0027549										230.51	0.675472	0.00293034
8.184	752.211	76.1549	9.91242	231.355	0.63959	0.00276454										230.515	0.677884	0.00294073
8.208	743.845	75.338	9.91828	231.267	0.643737	0.00278352										230.422	0.681766	0.00295877
8.232	736.014	74.2958	9.92478	231.169	0.648895	0.00280701										230.319	0.686653	0.00298131
8.256	728.817	73.5352	9.93388	231.033	0.653301	0.00282774										230.175	0.690495	0.00299987
8.28	721.662	72.5211	9.9427	230.9	0.658785	0.00285312										230.034	0.695481	0.00302338
8.304	713.859	71.831	9.95265	230.751	0.663182	0.00287402										229.877	0.699193	0.0030416
8.328	707.901	70.8732	9.9659	230.551	0.669116	0.00290225										229.667	0.704185	0.00306612
8.352	701.831	70.3099	9.97901	230.354	0.673436	0.00292349										229.459	0.707454	0.00308314
8.376	694.775	69.3803	9.98617	230.246	0.678733	0.00294786										229.345	0.712307	0.00310583
8.4	688.986	68.8082	9.99957	230.043	0.673827	0.00292913										229.133	0.705825	0.00308041
8.424	682.603	68.0959	10.0059	229.948	0.678106	0.00294895										229.034	0.70967	0.00309854
8.448	675.808	67.4247	10.0146	229.816	0.682594	0.00297018										228.896	0.713469	0.00311701
8.472	668.849	66.7671	10.0153	229.806	0.686054	0.00298537										228.885	0.717013	0.00313264
8.496	662.178	66.3151	10.0162	229.792	0.688607	0.00299665										228.87	0.719587	0.00314408
8.52	656.562	65.274	10.016	229.795	0.693822	0.00301931										228.873	0.725057	0.00316794
8.544	649.397	64.8082	10.0163	229.791	0.69646	0.00303084										228.87	0.72779	0.00317993
8.568	642.466	64.0274	10.0198	229.737	0.70112	0.00305183										228.813	0.732281	0.00320034
8.592	635.356	63.5616	10.0258	229.646	0.704604	0.00306821										228.718	0.735275	0.00321476
8.616	628.945	62.9452	10.0355	229.499	0.709364	0.00309092										228.565	0.739183	0.00323402
8.64	624.08	62.3333	10.0484	229.305	0.704921	0.00307416										228.363	0.733152	0.00321047
8.664	617.76	61.68	10.0544	229.213	0.709453	0.00309517										228.267	0.737194	0.00322952
8.688	611.853	60.8	10.0674	229.016	0.716197	0.00312728										228.063	0.742734	0.00325671
8.712	606.293	60.0933	10.0824	228.787	0.722414	0.00315758										227.826	0.747439	0.00328075
8.736	599.92	59.2533	10.0986	228.541	0.729695	0.00319283										227.571	0.753059	0.00330911
8.76	593.667	58.6267	10.1158	228.278	0.736072	0.00322446										227.3	0.757545	0.0033328
8.784	588.2	58.0933	10.1307	228.05	0.741633	0.00325206										227.066	0.76142	0.0033533
8.808	582.947	57.36	10.1452	227.829	0.748394	0.0032849										226.839	0.766526	0.00337916
8.832	576.907	56.56	10.1553	227.675	0.755067	0.00331643										226.681	0.772062	0.00340594
8.856	571.48	56.1733	10.1615	227.58	0.758694	0.00333375										226.584	0.774963	0.00342019
8.88	567.143	55.7013	10.166	227.511	0.752598	0.00330796										226.514	0.76815	0.00339118
8.904	561.922	55.2208	10.1704	227.442	0.756573	0.00332644										226.444	0.771617	0.00340755
8.928	556.844	54.7273	10.1765	227.35	0.760912	0.00334688										226.349	0.775241	0.00342498
8.952	551.104	54.1688	10.1773	227.336	0.76496	0.00336488										226.336	0.779252	0.0034429
8.976	546.247	53.7792	10.175	227.372	0.767418	0.00337516										226.373	0.782069	0.00345479
9	541.078	53.1818	10.1775	227.334	0.772047	0.00339609										226.334	0.786452	0.00347475
9.024	536.532	52.7273	10.1783	227.322	0.775493	0.00341143										226.321	0.78985	0.00348996
9.048	531.675	52.1688	10.1804	227.289	0.779919	0.00343141										226.287	0.794065	0.0035091
9.072	526.052	51.7143	10.1823	227.26	0.783699	0.00344846										226.259	0.79766	0.00352544
9.096	521	51.2078	10.183	227.25	0.787672	0.00346611										226.247	0.801606	0.00354305
9.12	517.139	50.6962	10.1909	227.127	0.782731	0.00344622										226.123	0.795481	0.00351791
9.144	511.481	50.1899	10.2022	226.953	0.788537	0.00347445										225.946	0.799793	0.00353975
9.168	507.266	49.7342	10.2106	226.825	0.793476	0.00349819										225.816	0.803617	0.00355872
9.192	502.785	49.3165	10.2165	226.734	0.797819	0.00351874										225.724	0.807169	0.0035759
9.216	498.127	48.9241	10.2282	226.552	0.803028	0.00354457										225.54	0.810721	0.00359457
9.24	493.684	48.1899	10.2403	226.366	0.810942	0.00358243										225.353	0.816923	0.00362508
9.264	488.861	47.4684	10.2489	226.233	0.818377	0.00361741										225.219	0.82311	0.00365471
9.288	484.38	47.1772	10.2575	226.099	0.822511	0.00363784										225.084	0.825948	0.0036695
9.312	479.835	46.7848	10.2658	225.971	0.827444	0.00366172										224.956	0.829623	0.00368793
9.336	475.582	46.1646	10.2764	225.806	0.834718	0.00369662										224.79	0.83524	0.00371564
9.36	472.062	45.8025	10.288	225.625	0.829654	0.00367713										224.61	0.828341	0.00368791
9.384	467.37	45.3951	10.2949	225.519	0.834645	0.00370101										224.503	0.832228	0.00370697
9.408	462.481	44.963	10.3	225.439	0.839617	0.00372437										224.424	0.836355	0.00372668
9.432	458.235	44.5309	10.3083	225.31	0.845179	0.00375118										224.296	0.84055	0.0037475
9.456	453.864	44.0123	10.3189	225.145	0.852034	0.00378438										224.132	0.845612	0.00377283
9.48	449.667	43.6173	10.3266	225.025	0.857343	0.00380999										224.013	0.84959	0.0037926
9.504	445.037	43.1235	10.3349	224.894	0.863789	0.00384086										223.884	0.854557	0.00381697
9.528	440.926	42.5802	10.3455	224.728	0.8712	0.00387668										223.72	0.860057	0.00384435
9.552	436.951	42.1852	10.3595	224.51	0.877997	0.00391073										223.504	0.864313	0.00386711
9.576	433.346	41.7778	10.3753	224.26	0.885374	0.00394797										223.259	0.868734	0.00389115
9.6	429.976	41.3976	10.3907	224.018	0.881684	0.00393578										223.021	0.862335	0.00386661
9.624	425.952	40.9639	10.4111	223.697	0.890446	0.00398059										222.708	0.867159	0.0038937
9.648	421.759	40.506	10.4298	223.401	0.899317	0.00402558										222.42	0.872266	0.00392171
9.672	417.578	40	10.4446	223.166	0.908033	0.00406887										222.193	0.87787	0.00395094
9.696	413.675	39.5301	10.4589	222.939	0.916416	0.00411062										221.973	0.883167	0.00397871
9.72	409.675	39.0843	10.4724	222.725	0.924522	0.00415096										221.768	0.888296	0.00400553
9.744	405.458	38.494	10.4842	222.535	0.934051	0.00419731										221.586	0.895035	0.00403922
9.768	401.639	38.1566	10.4934	222.389	0.940287	0.00422813										221.445	0.899116	0.00406021
9.792	397.53	37.7952	10.5036	222.226	0.94714	0.00426205										221.29	0.903548	0.00408309
9.816	393.88	37.4578	10.5104	222.117	0.952998	0.00429052										221.186	0.907692	0.00410375
9.84	390.247	37.0941	10.5161	222.025	0.947643	0.00426819										221.098	0.901377	0.00407682
9.864	386.906	36.7882	10.5246	221.889	0.953578	0.00429755										220.969	0.905215	0.00409657
9.888	383.412	36.5176	10.5309	221.788	0.95866	0.00432241										220.874	0.908691	0.00411407
9.912	379.6	36.0706	10.5397	221.647	0.966599	0.00436099										220.74	0.914296	0.00414196
9.936	376.424	35.8	10.5547	221.405	0.973942	0.00439892										220.512	0.917915	0.00416266
9.96	372.941	35.4235	10.574	221.092	0.983863	0.00445001										220.218	0.922889	0.0041908
9.984	369.129	34.9059	10.5942	220.766	0.996082	0.00451194										219.912	0.929677	0.00422749
10.008	365.576	34.4824	10.6121	220.474	1.00676	0.00456638										219.64	0.935384	0.00425872
10.032	362.424	34.1176	10.631	220.166	1.01708	0.0046196										219.355	0.940399	0.00428711
10.056	359.329	33.6353	10.6487	219.876	1.02894	0.00467961										219.088	0.946975	0.00432236
10.08	356.368	33.2184	10.6651	219.608	1.02774	0.0046799										218.841	0.941782	0.0043035
10.104	352.885	32.8506	10.6783	219.391	1.03713	0.00472732										218.643	0.947033	0.00433142
10.128	349.897	32.6552	10.6933	219.143	1.04465	0.00476698										218.416	0.950008	0.00434953
10.152	346.678	32.3793	10.7069	218.917	1.0531	0.00481047										218.212	0.954108	0.00437239
10.176	343.609	32.0575	10.7237	218.638	1.06332	0.00486337										217.96	0.958868	0.00439929
10.2	340.759	31.8621	10.7384	218.396	1.0711	0.00490439										217.741	0.961908	0.00441767
10.224	336.874	31.5632	10.7468	218.255	1.07885	0.0049431										217.615	0.96654	0.00444152
10.248	333.448	31.046	10.7579	218.069	1.09099	0.00500295										217.449	0.974296	0.00448057
10.272	330.092	30.7011	10.7773	217.744	1.10326	0.00506677										217.159	0.979695	0.00451141
10.296	326.966	30.2529	10.7984	217.39	1.11809	0.00514324										216.846	0.986677	0.00455014
10.32	324.337	29.9101	10.8251	216.938	1.12057	0.00516538										216.449	0.980897	0.00453177
10.344	321.348	29.6966	10.8509	216.499	1.13362	0.00523616										216.066	0.98441	0.00455606
10.368	318.36	29.3034	10.8838	215.936	1.15283	0.00533875										215.58	0.990667	0.00459536
10.392	315.449	28.8652	10.906	215.555	1.16953	0.00542568										215.253	0.997778	0.00463537
10.416	312.056	28.5281	10.9302	215.135	1.1857	0.00551142										214.897	1.00345	0.00466944
10.44	308.843	28.0449	10.9519	214.758	1.20418	0.00560715										214.579	1.0116	0.00471435
10.464	305.685	27.8427	10.9717	214.412	1.21679	0.00567501										214.289	1.01522	0.00473762
10.488	302.899	27.4494	10.9903	214.085	1.23308	0.00575975										214.017	1.02207	0.00477566
10.512	300.157	27.3258	11.0037	213.85	1.24185	0.0058071										213.823	1.02444	0.00479108
10.536	297.742	27.0225	11.0136	213.673	1.25302	0.00586419										213.677	1.02994	0.00482005
10.56	295.462	26.7473	11.0178	213.599	1.24726	0.00583928										213.616	1.02363	0.00479191
10.584	292.692	26.4615	11.016	213.631	1.25309	0.00586568										213.643	1.0291	0.00481694
10.608	289.824	26.2857	11.0201	213.559	1.25925	0.0058965										213.584	1.03263	0.00483478
10.632	286.648	26.033	11.0237	213.495	1.26705	0.0059348										213.531	1.03765	0.00485948
10.656	283.835	25.7143	11.0367	213.264	1.28068	0.00600516										213.342	1.0438	0.00489261
10.68	281.505	25.6264	11.0455	213.106	1.28724	0.00604039										213.214	1.04569	0.00490443
10.704	279.033	25.3846	11.0511	213.005	1.29598	0.00608426										213.132	1.05056	0.00492916
10.728	276.44	25.0769	11.0522	212.986	1.30425	0.00612365										213.117	1.05685	0.00495901
10.752	274.187	24.7582	11.058	212.882	1.31517	0.00617793										213.032	1.06335	0.00499149
10.776	271.209	24.3736	11.0653	212.752	1.32878	0.00624569										212.927	1.0714	0.00503176
10.8	268.925	24.1935	11.0712	212.646	1.32225	0.00621811										212.842	1.06372	0.00499771
10.824	266.484	23.9892	11.0804	212.48	1.33247	0.00627104										212.708	1.06814	0.00502163
10.848	263.839	23.828	11.0887	212.33	1.34134	0.00631724										212.588	1.07178	0.00504157
10.872	261.032	23.5376	11.0977	212.166	1.35413	0.00638244										212.457	1.07817	0.00507474
10.896	258.065	23.2688	11.1066	212.005	1.36655	0.00644587										212.329	1.08424	0.00510641
10.92	255.731	23.0323	11.1103	211.938	1.37543	0.00648978										212.276	1.08969	0.00513334
10.944	253.194	22.8387	11.1196	211.768	1.38632	0.00654638										212.142	1.09422	0.00515795
10.968	250.634	22.6129	11.1281	211.614	1.39784	0.00660562										212.02	1.09954	0.00518603
10.992	248.419	22.3333	11.1433	211.333	1.41485	0.00669489										211.801	1.10599	0.00522185
11.016	245.667	21.9892	11.1599	211.029	1.4351	0.0068005										211.563	1.11412	0.00526615
11.04	243.453	21.8	11.1747	210.754	1.43472	0.00680758										211.35	1.10686	0.00523711
11.064	240.537	21.4421	11.1868	210.529	1.45359	0.00690447										211.178	1.11564	0.00528293
11.088	238.063	21.2526	11.1994	210.295	1.46782	0.00697981										210.998	1.12043	0.00531014
11.112	235.937	20.9895	11.2161	209.98	1.4873	0.00708306										210.759	1.12694	0.00534707
11.136	233.863	20.7474	11.2265	209.784	1.5025	0.00716213										210.61	1.13316	0.00538037
11.16	231.474	20.5684	11.2284	209.748	1.51035	0.00720078										210.584	1.13812	0.00540459
11.184	229.095	20.3895	11.2356	209.612	1.52182	0.00726017										210.481	1.14303	0.00543054
11.208	226.495	20.1789	11.2428	209.476	1.53458	0.00732581										210.379	1.14887	0.00546095
11.232	224.768	19.9474	11.2516	209.308	1.54926	0.00740184										210.254	1.15515	0.00549407
11.256	222.274	19.7789	11.2485	209.367	1.55388	0.00742182										210.298	1.16025	0.00551718
11.28	220.165	19.6701	11.2473	209.39	1.54147	0.00736171										210.315	1.15161	0.00547567
11.304	217.979	19.3814	11.2444	209.446	1.55057	0.00740319										210.357	1.15999	0.0055144
11.328	215.68	19.0928	11.2371	209.583	1.55701	0.00742909										210.46	1.16867	0.00555296
11.352	213.515	18.8969	11.2324	209.673	1.56184	0.00744893										210.527	1.17481	0.00558031
11.376	211.309	18.8557	11.2246	209.82	1.5588	0.00742921										210.638	1.17665	0.00558611
11.4	209.041	18.567	11.2204	209.9	1.56772	0.00746888										210.698	1.18562	0.00562712
11.424	207.072	18.4536	11.2176	209.951	1.5709	0.00748223										210.737	1.18948	0.00564438
11.448	204.608	18.3402	11.2113	210.071	1.57186	0.00748252										210.828	1.19357	0.00566135
11.472	202.371	18.1134	11.2009	210.266	1.57465	0.00748885										210.976	1.20116	0.00569336
11.496	200.474	17.9278	11.1903	210.465	1.57568	0.00748669										211.128	1.20754	0.00571945
11.52	199.071	17.7879	11.1917	210.438	1.56669	0.00744489										211.108	1.1999	0.00568383
11.544	197.323	17.6768	11.1873	210.519	1.56892	0.00745264										211.17	1.20388	0.005701
11.568	195.313	17.4747	11.1845	210.571	1.57605	0.00748465										211.21	1.21081	0.00573274
11.592	193.374	17.2929	11.1936	210.402	1.5903	0.00755839										211.08	1.21695	0.00576536
11.616	191.333	17.1111	11.2046	210.197	1.60608	0.00764081										210.924	1.22318	0.00579913
11.64	189.646	16.899	11.2125	210.049	1.62131	0.00771875										210.811	1.23048	0.00583687
11.664	187.98	16.7677	11.2251	209.81	1.63657	0.00780024										210.631	1.23506	0.00586364
11.688	185.828	16.6061	11.2353	209.618	1.65192	0.00788062										210.485	1.24092	0.00589552
11.712	183.97	16.3434	11.2436	209.46	1.6708	0.00797671										210.367	1.25036	0.0059437
11.736	182.051	16.1212	11.2476	209.385	1.68499	0.00804733										210.311	1.25869	0.00598491
11.76	180.644	16.0297	11.248	209.378	1.6734	0.00799225										210.306	1.24982	0.00594286
11.784	178.822	15.7822	11.2465	209.404	1.68505	0.00804688										210.326	1.25933	0.00598755
11.808	177.05	15.703	11.2478	209.381	1.69056	0.0080741										210.308	1.26273	0.00600419
11.832	175.495	15.5743	11.2597	209.153	1.70661	0.00815961										210.139	1.26768	0.00603261
11.856	173.832	15.4851	11.2653	209.047	1.71603	0.00820883										210.06	1.27139	0.0060525
11.88	172.109	15.3861	11.2625	209.099	1.71969	0.00822425										210.099	1.27572	0.00607203
11.904	170.545	15.2178	11.2618	209.114	1.72846	0.00826562										210.109	1.28268	0.00610482
11.928	168.812	15.0396	11.2549	209.245	1.73324	0.00828332										210.207	1.29034	0.00613845
11.952	167.584	14.802	11.2565	209.215	1.74768	0.00835352										210.185	1.30016	0.00618581
11.976	166.287	14.6931	11.257	209.205	1.75461	0.00838707										210.177	1.30498	0.00620896
12	164.893	14.6408	11.2629	209.092	1.74555	0.00834823										210.093	1.29466	0.00616234
12.024	163.34	14.5049	11.2711	208.936	1.76017	0.00842447										209.977	1.30052	0.00619362
12.048	161.835	14.3786	11.2778	208.807	1.77332	0.00849266										209.882	1.30607	0.00622289
12.072	160.388	14.2039	11.2904	208.563	1.79435	0.00860341										209.703	1.31358	0.006264
12.096	159.155	14.1165	11.2992	208.394	1.80732	0.00867261										209.58	1.31749	0.00628635
12.12	157.631	13.9612	11.3109	208.167	1.82728	0.00877797										209.415	1.32441	0.00632434
12.144	156.107	13.8447	11.3215	207.959	1.84438	0.00886899										209.264	1.32975	0.0063544
12.168	154.864	13.7282	11.3329	207.735	1.86238	0.00896517										209.104	1.33504	0.00638457
12.192	153.573	13.5146	11.3435	207.527	1.8862	0.00908894										208.955	1.34484	0.00643604
12.216	152.087	13.3204	11.3492	207.414	1.90492	0.00918413										208.874	1.35418	0.00648324
12.24	150.981	13.1905	11.3504	207.391	1.89684	0.00914618										208.858	1.34764	0.00645243
12.264	149.562	13.1429	11.3492	207.416	1.89958	0.00915831										208.875	1.35043	0.00646526
12.288	148.133	13.0095	11.3501	207.396	1.91017	0.00921028										208.862	1.35728	0.00649845
12.312	146.638	12.8952	11.35	207.399	1.91858	0.00925069										208.864	1.36335	0.00652748
12.336	145.343	12.8	11.3438	207.521	1.91994	0.00925176										208.951	1.36868	0.00655025
12.36	143.829	12.7429	11.3374	207.647	1.91869	0.00924017										209.041	1.37227	0.0065646
12.384	142.524	12.6381	11.3202	207.984	1.91076	0.00918702										209.283	1.37849	0.00658674
12.408	141.457	12.5333	11.3129	208.128	1.91194	0.00918635										209.387	1.3844	0.00661171
12.432	140.076	12.419	11.3049	208.283	1.91357	0.00918736										209.499	1.39102	0.00663976
12.456	138.771	12.2857	11.2908	208.556	1.91116	0.00916376										209.699	1.39887	0.00667084
12.48	137.972	12.1589	11.2794	208.775	1.8928	0.0090662										209.859	1.39299	0.00663774
12.504	136.243	12.1028	11.2709	208.938	1.89049	0.00904806										209.979	1.3969	0.00665255
12.528	135.056	11.9533	11.2585	209.176	1.89139	0.00904209										210.156	1.40573	0.006689
12.552	133.794	11.8411	11.2431	209.47	1.88736	0.00901014										210.375	1.41278	0.00671552
12.576	132.495	11.8131	11.229	209.737	1.8786	0.00895694										210.575	1.41524	0.00672084
12.6	131.402	11.7009	11.2121	210.056	1.87381	0.00892049										210.817	1.42236	0.00674691
12.624	130.14	11.6262	11.1852	210.56	1.85896	0.00882866										211.201	1.42777	0.00676024
12.648	128.794	11.5607	11.1618	210.994	1.84683	0.008753										211.536	1.43263	0.00677249
12.672	127.477	11.4673	11.1324	211.535	1.83288	0.0086647										211.958	1.43923	0.00679014
12.696	126.215	11.3458	11.0992	212.14	1.81908	0.00857489										212.437	1.44756	0.00681404
12.72	125.358	11.2844	11.0762	212.555	1.79177	0.00842971										212.768	1.43863	0.00676149
12.744	124.101	11.2294	11.0456	213.105	1.77638	0.00833572										213.213	1.44301	0.00676791
12.768	123.018	11.1835	11.0286	213.408	1.76951	0.00829166										213.46	1.44652	0.00677657
12.792	121.835	11.1009	11.0149	213.65	1.76764	0.00827354										213.658	1.45225	0.00679705
12.816	121.073	11.0734	10.9975	213.959	1.75931	0.00822265										213.913	1.45454	0.00679969
12.84	120.202	10.9633	10.9729	214.39	1.75305	0.0081769										214.271	1.462	0.00682313
12.864	119.119	10.9358	10.9498	214.795	1.74206	0.00811032										214.61	1.46453	0.00682415
12.888	118.046	10.7248	10.93	215.139	1.74686	0.00811968										214.9	1.47845	0.00687972
12.912	116.862	10.633	10.9194	215.323	1.74838	0.00811978										215.056	1.48502	0.00690527
12.936	115.358	10.5596	10.9161	215.38	1.75303	0.00813924										215.104	1.49058	0.00692958
12.96	114.414	10.5405	10.919	215.331	1.74081	0.00808434										215.062	1.4788	0.00687613
12.984	113.333	10.4414	10.9246	215.234	1.75226	0.00814119										214.98	1.48574	0.00691107
13.008	112.441	10.3784	10.933	215.088	1.76259	0.00819473										214.856	1.49027	0.00693614
13.032	111.378	10.2342	10.9299	215.142	1.77278	0.00824004										214.903	1.50048	0.00698216
13.056	110.577	10.1081	10.917	215.365	1.77594	0.00824618										215.091	1.50963	0.00701854
13.08	109.649	10	10.913	215.435	1.78298	0.00827621										215.151	1.51766	0.00705393
13.104	108.568	9.84685	10.9119	215.452	1.79579	0.00833496										215.166	1.52907	0.00710649
13.128	107.676	9.8018	10.9148	215.402	1.80189	0.00836521										215.123	1.53279	0.00712516
13.152	106.856	9.73874	10.9218	215.282	1.81189	0.00841632										215.021	1.53774	0.00715159
13.176	105.658	9.73874	10.9241	215.242	1.81412	0.00842829										214.987	1.53845	0.00715599
13.2	104.947	9.64602	10.9171	215.362	1.80231	0.00836874										215.089	1.53198	0.00712251
13.224	104.212	9.61062	10.9081	215.518	1.80061	0.00835478										215.222	1.5351	0.00713266
13.248	103.274	9.48673	10.8957	215.732	1.80479	0.00836585										215.405	1.54496	0.00717235
13.272	102.345	9.38053	10.8847	215.922	1.80844	0.00837546										215.567	1.55364	0.00720719
13.296	101.265	9.28319	10.8705	216.166	1.80977	0.00837216										215.777	1.56189	0.00723843
13.32	100.363	9.23894	10.8677	216.213	1.81284	0.0083845										215.818	1.56592	0.00725574
13.344	99.5221	9.15929	10.861	216.328	1.81688	0.00839873										215.917	1.57275	0.00728403
13.368	98.7699	9.0708	10.8553	216.425	1.82232	0.00842008										216.002	1.5803	0.00731615
13.392	97.6814	8.99115	10.847	216.566	1.82585	0.00843092										216.125	1.58749	0.00734527
13.416	96.6726	8.93805	10.8363	216.747	1.82564	0.00842288										216.282	1.59257	0.00736337
13.44	95.9565	8.86957	10.82	217.025	1.80764	0.00832919										216.525	1.58481	0.00731929
13.464	95	8.7913	10.8099	217.196	1.81023	0.00833452										216.675	1.59197	0.00734725
13.488	94.0261	8.72174	10.8054	217.272	1.81518	0.00835445										216.742	1.59848	0.00737505
13.512	93.4	8.65217	10.7907	217.518	1.81445	0.00834157										216.959	1.60485	0.007397
13.536	92.6348	8.58261	10.7845	217.624	1.81843	0.00835582										217.053	1.61137	0.00742384
13.56	91.8	8.55652	10.7832	217.645	1.82098	0.00836674										217.072	1.61424	0.00743642
13.584	91.4348	8.50435	10.7849	217.617	1.82729	0.00839682										217.047	1.61903	0.00745936
13.608	90.7652	8.3913	10.7908	217.517	1.84231	0.00846972										216.959	1.62947	0.0075105
13.632	89.7391	8.36522	10.797	217.413	1.84924	0.00850566										216.866	1.63256	0.00752797
13.656	88.8957	8.23478	10.7972	217.41	1.86341	0.00857093										216.864	1.645	0.0075854
13.68	88.0769	8.15385	10.7932	217.478	1.8543	0.00852639										216.923	1.63892	0.0075553
13.704	87.5299	8.07692	10.801	217.345	1.86721	0.008591										216.806	1.64646	0.00759413
13.728	86.6923	7.97436	10.8068	217.248	1.88217	0.00866372										216.721	1.65677	0.00764472
13.752	86.0513	7.93162	10.807	217.244	1.88753	0.00868856										216.717	1.66137	0.00766607
13.776	85.265	7.89744	10.8166	217.083	1.89742	0.00874055										216.576	1.66526	0.00768905
13.8	84.6154	7.87179	10.8291	216.871	1.90807	0.0087982										216.39	1.66822	0.00770931
13.824	84.0256	7.76923	10.8367	216.741	1.92461	0.00887978										216.277	1.67871	0.00776188
13.848	83.4701	7.71795	10.8459	216.585	1.93647	0.00894093										216.14	1.68422	0.00779227
13.872	82.8547	7.65812	10.8523	216.476	1.94781	0.00899779										216.046	1.69072	0.00782572
13.896	82.3077	7.59829	10.8758	216.074	1.9698	0.00911635										215.698	1.69708	0.00786787
13.92	81.8571	7.48739	10.9166	215.372	1.99268	0.00925227										215.097	1.6941	0.00787597
13.944	81.0504	7.44538	10.9618	214.586	2.02881	0.00945454										214.435	1.69858	0.00792122
13.968	80.521	7.36134	11.0065	213.799	2.07162	0.00968955										213.781	1.70718	0.00798567
13.992	79.8992	7.30252	11.0569	212.902	2.11786	0.00994758										213.048	1.71305	0.00804069
14.016	79.3445	7.14286	11.1009	212.108	2.17557	0.0102569										212.412	1.73002	0.00814465
14.04	78.7143	7	11.1465	211.276	2.23591	0.0105829										211.756	1.74555	0.00824323
14.064	77.9664	6.93277	11.1843	210.575	2.28152	0.0108347										211.213	1.75293	0.00829936
14.088	77.2521	6.83193	11.2175	209.954	2.33008	0.0110981										210.739	1.76443	0.00837258
14.112	76.5294	6.73109	11.2397	209.534	2.36962	0.011309										210.423	1.77649	0.00844249
14.136	75.7983	6.70588	11.2652	209.048	2.40165	0.0114885										210.061	1.7794	0.00847089
14.16	75.3058	6.64463	11.2822	208.722	2.41093	0.0115509										209.82	1.77197	0.00844521
14.184	74.6612	6.57851	11.2903	208.566	2.43196	0.0116604										209.705	1.78047	0.00849034
14.208	74.1074	6.58678	11.3008	208.363	2.44316	0.0117255										209.557	1.77961	0.00849223
14.232	73.3802	6.56198	11.3042	208.296	2.45233	0.0117733										209.509	1.78329	0.00851176
14.256	72.8017	6.4876	11.2983	208.411	2.45915	0.0117995										209.593	1.79344	0.00855679
14.28	72.157	6.38843	11.3	208.379	2.47946	0.0118988										209.569	1.80677	0.00862135
14.304	71.4711	6.30579	11.2993	208.392	2.4945	0.0119702										209.579	1.81834	0.00867616
14.328	70.9835	6.24793	11.2924	208.526	2.49773	0.011978										209.676	1.82681	0.00871254
14.352	70.3223	6.19835	11.2913	208.546	2.50667	0.0120198										209.691	1.83425	0.0087474
14.376	69.6942	6.16529	11.3012	208.354	2.52534	0.0121204										209.551	1.83906	0.00877621
14.4	69.2195	6.11382	11.3088	208.207	2.52408	0.0121229										209.444	1.83131	0.0087437
14.424	68.6911	6.06504	11.312	208.146	2.53795	0.0121932										209.399	1.83852	0.00877997
14.448	68.0976	6.04065	11.3152	208.083	2.54745	0.0122425										209.354	1.84245	0.00880066
14.472	67.439	6	11.3253	207.886	2.56874	0.0123565										209.212	1.84852	0.00883564
14.496	66.8293	5.9187	11.3406	207.584	2.60523	0.0125503										208.995	1.86022	0.00890078
14.52	66.2683	5.86179	11.3583	207.234	2.64071	0.0127426										208.747	1.86842	0.00895065
14.544	65.6748	5.79675	11.3727	206.949	2.67457	0.0129238										208.546	1.87811	0.00900576
14.568	65.2602	5.73984	11.3843	206.715	2.70353	0.0130785										208.382	1.88663	0.00905373
14.592	64.8211	5.65041	11.408	206.237	2.75794	0.0133727										208.051	1.89978	0.00913136
14.616	64.4065	5.5935	11.4311	205.766	2.80634	0.0136385										207.728	1.9081	0.00918555
14.64	64.024	5.568	11.4379	205.628	2.80072	0.0136204										207.634	1.8969	0.00913576
14.664	63.368	5.52	11.4399	205.586	2.81621	0.0136984										207.606	1.90516	0.00917679
14.688	62.768	5.48	11.4405	205.574	2.82761	0.0137547										207.598	1.91224	0.00921128
14.712	62.376	5.408	11.4324	205.741	2.83284	0.013769										207.711	1.92477	0.00926658
14.736	61.792	5.376	11.4137	206.121	2.81309	0.0136478										207.971	1.93161	0.00928791
14.76	61.192	5.384	11.3953	206.494	2.78499	0.013487										208.228	1.93188	0.00927771
14.784	60.624	5.352	11.3873	206.656	2.78196	0.0134618										208.341	1.93827	0.00930335
14.808	60.216	5.312	11.3787	206.828	2.77997	0.013441										208.461	1.94587	0.00933445
14.832	59.56	5.28	11.3623	207.155	2.76582	0.0133514										208.691	1.95286	0.00935766
14.856	59.04	5.24	11.3404	207.589	2.74646	0.0132303										208.999	1.96133	0.00938438
14.88	58.7874	5.19685	11.3231	207.928	2.71274	0.0130465										209.242	1.95428	0.00933979
14.904	58.3071	5.11024	11.3118	208.149	2.71999	0.0130675										209.402	1.97055	0.00941037
14.928	57.7323	5.07087	11.3143	208.1	2.734	0.0131379										209.366	1.97825	0.00944876
14.952	57.0787	5.06299	11.321	207.969	2.74598	0.0132037										209.272	1.98031	0.00946283
14.976	56.7323	5.02362	11.3296	207.8	2.76802	0.0133206										209.15	1.98755	0.00950299
15	56.252	4.97638	11.3377	207.641	2.79196	0.0134461										209.037	1.99655	0.00955118
15.024	55.7638	4.96063	11.3438	207.522	2.80538	0.0135185										208.951	1.9999	0.00957116
15.048	55.4331	4.88189	11.3365	207.665	2.81666	0.0135634										209.054	2.01546	0.00964087
15.072	55.0709	4.82677	11.3306	207.781	2.82403	0.0135913										209.137	2.02679	0.00969123
15.096	54.6378	4.80315	11.3395	207.605	2.84369	0.0136976										209.011	2.03163	0.00972022
	54.4031	4.7907	11.3429
	53.9845	4.74419	11.3437
	53.5736	4.72868	11.3407
	53.1783	4.69767	11.3263
	52.8062	4.64341	11.3081
	52.4341	4.62791	11.2935
	51.9147	4.58915	11.2818
	51.3488	4.5814	11.2679
	50.7752	4.53488	11.257
	50.5736	4.51163	11.2531
	50.1679	4.47328	11.2438
	49.7939	4.43511	11.2391
	49.3588	4.39695	11.2325
	48.8626	4.35878	11.2402
	48.5496	4.30534	11.2561
	48.0916	4.26718	11.2756
	47.8702	4.24427	11.2978
	47.5344	4.22901	11.3177
	47.1527	4.17557	11.3435
	46.7863	4.1145	11.3713
	46.5564	4.07519	11.3905
	46.1805	4.03008	11.411
	45.8722	4.00752	11.4396
	45.5188	3.95489	11.47
	45.1955	3.92481	11.4965
	44.7444	3.89474	11.5127
	44.3383	3.85714	11.5275
	44.0226	3.79699	11.5557
	43.6842	3.77444	11.5878
	43.3759	3.74436	11.6048
	43.1185	3.73333	11.6201
	43	3.71111	11.6404
	42.7185	3.62963	11.6507
	42.3926	3.59259	11.6532
	42.1037	3.6	11.6572
	41.7185	3.57037	11.6673
	41.4667	3.54074	11.6747
	41.0148	3.53333	11.6883
	40.7185	3.5037	11.696
	40.363	3.47407	11.6842
	40.1241	3.43066	11.6855
	39.7299	3.41606	11.6898
	39.4088	3.35766	11.692
	39.1095	3.29927	11.6994
	38.7591	3.32117	11.706
	38.4599	3.28467	11.7072
	38.1095	3.24818	11.7103
	37.8613	3.22628	11.721
	37.6277	3.21898	11.7205
	37.3869	3.19708	11.7136
	37.2374	3.20144	11.7272
	36.964	3.15108	11.7476
	36.7626	3.1295	11.7523
	36.4604	3.10791	11.7529
	36.2662	3.07914	11.7586
	35.9712	3.04317	11.7594
	35.7986	3	11.7716
	35.5252	3.01439	11.7862
	35.3094	3.00719	11.8081
	35.0863	2.98561	11.8336
	34.8582	2.97872	11.8406
	34.5461	2.93617	11.8399
	34.2411	2.87943	11.8231
	34.1773	2.85106	11.8174
	33.9078	2.8227	11.8166
	33.6312	2.83688	11.8192
	33.4255	2.82979	11.8211
	33.1631	2.8227	11.8095
	32.922	2.80851	11.7909
	32.7872	2.79433	11.7707
	32.6224	2.76923	11.7588
	32.3007	2.75524	11.7678
	32.0629	2.75524	11.7778
	31.8741	2.72727	11.7903
	31.6783	2.69231	11.8022
	31.4056	2.64336	11.8091
	31.1818	2.60839	11.8123
	31.014	2.6014	11.8234
	30.6713	2.58042	11.85
	30.4196	2.56643	11.8771
